# Supplementary material
Source: PubMed Central journal article supplement (PMC3717557)

**Allyl *m*-Trifluoromethyldiazirine Mephobarbital: An Unusually Potent  
Enantioselective and Photoreactive Barbiturate General Anesthetic**

**Supporting Information**

Pavel Y. Savechenkov<sup>§</sup>

Xi Zhang<sup>‡</sup>

David C. Chiara<sup>†</sup>

Deirdre S. Stewart<sup>‡</sup>

Rile Ge<sup>‡</sup>

Xiaojuan Zhou<sup>‡</sup>

Douglas E. Raines<sup>‡</sup>

Jonathan B. Cohen<sup>†</sup>

Stuart A. Forman<sup>‡</sup>

Keith W. Miller<sup>‡#</sup>

Karol S. Bruzik<sup>\*§</sup>

<sup>‡</sup>Department of Anesthesia, Critical Care and Pain Medicine, Massachusetts General Hospital, 32 Fruit Street, Boston, Massachusetts 02114, <sup>#</sup>Department of Biological Chemistry and <sup>#</sup>Molecular Pharmacology, and <sup>†</sup>Department of Neurobiology, 220 Longwood Avenue, Harvard Medical School, Boston, Massachusetts 02115, and <sup>§</sup>Department of Medicinal Chemistry and Pharmacognosy, University of Illinois at Chicago, 833 S. Wood Street (M/C 781), Chicago, IL 60612-7231

Supporting information available: (1) Chiral chromatography of ( $\pm$ )-**14**, (2) HPLC of the mixture after hydrogenation of compound **15**, (3) determination of pK<sub>a</sub> value of **14**, (4) NMR data for all new synthesized compounds.

**Figure 1s.** HPLC separation of enantiomers of compound **14**. Conditions: Daicell Chiralpack AD<sup>®</sup> column, 20x200 mm eluted with isocratic 15% ethanol in hexane as an eluent at 6.5 mL/min flow rate.

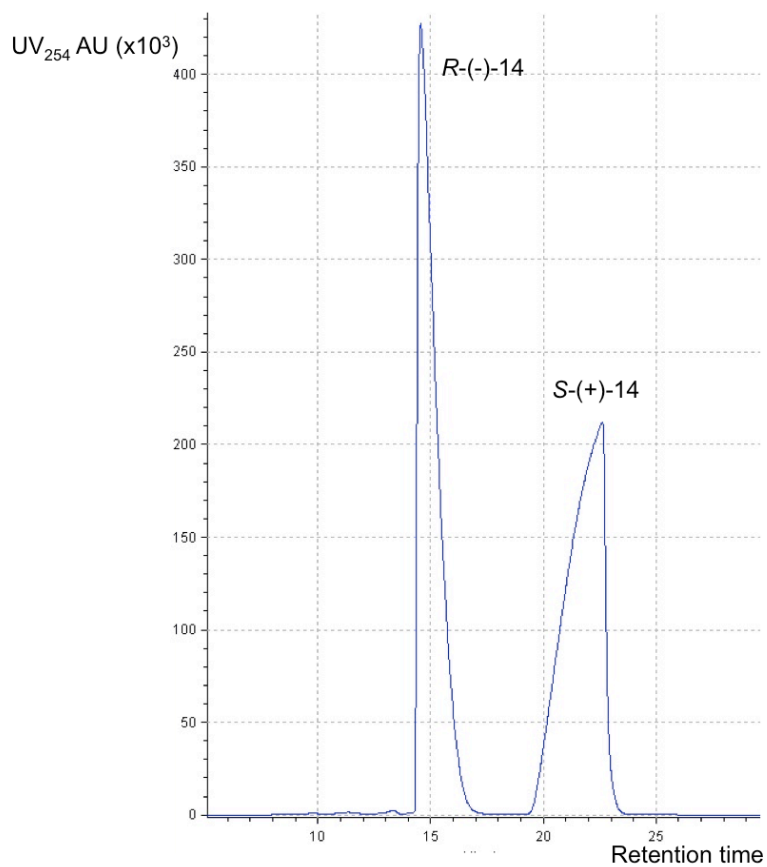

**Figure 2s.** Separation of compounds **14** and **15** by reverse phase HPLC. HPLC method: Luna 5  $\mu\text{m}$  C18 100 $\text{\AA}$  column, 150 x 3.00 mm from Phenomenex. During the first 2 minutes isocratic 0.05 M TFA was used as an eluent; starting at 2 min the gradient of 0.05 M TFA/MeOH (0-100%) was used to reach 100% at 17 min, and elution was continued with isocratic MeOH. Flow rate: 1 mL/min. Detection – UV array detector at 254 nm. (A) starting propargyl barbiturate **15**; (B) product allyl barbiturate **14**; (C) the mixture of **14** and **15**.

(A)

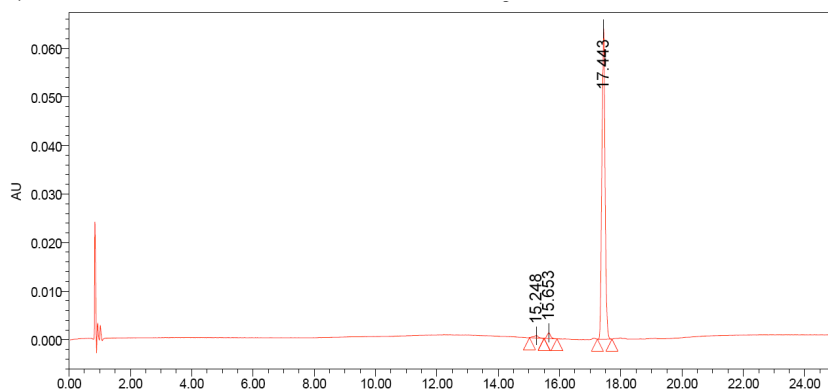

(B)

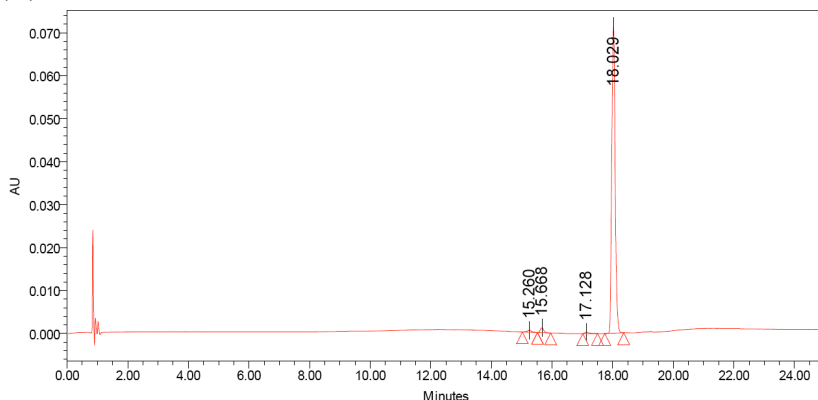

(C)

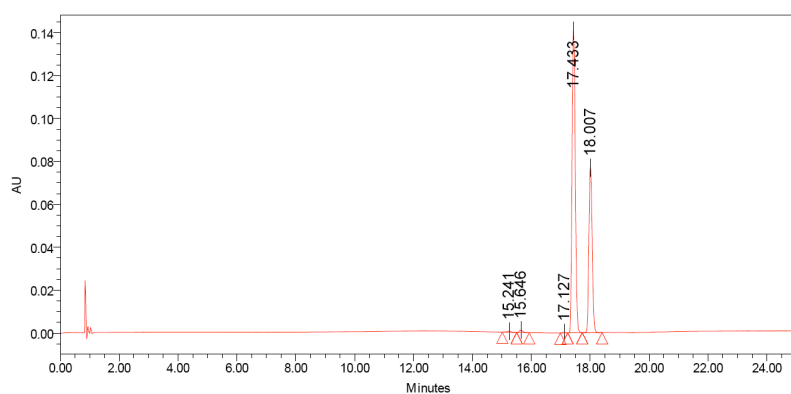

**Figure 3s.** Determination of  $pK_a$  of barbiturate ( $\pm$ )-14.

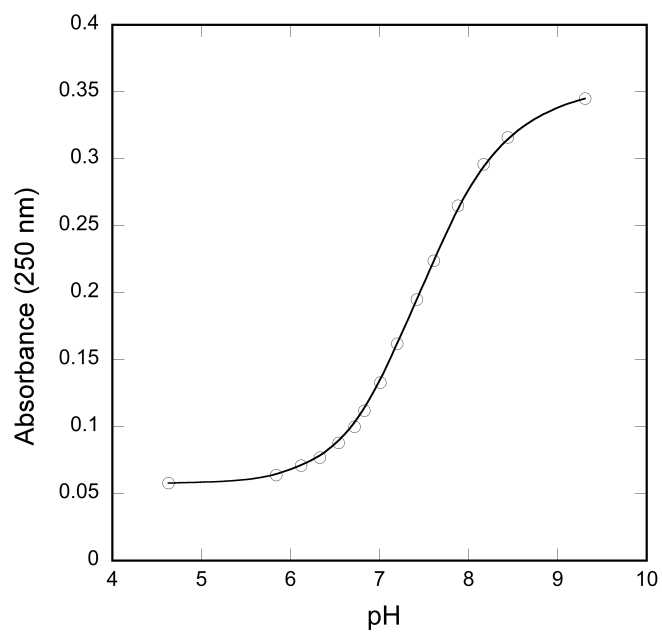

Figure 4s. NMR Data for Synthetic Intermediates and Products.

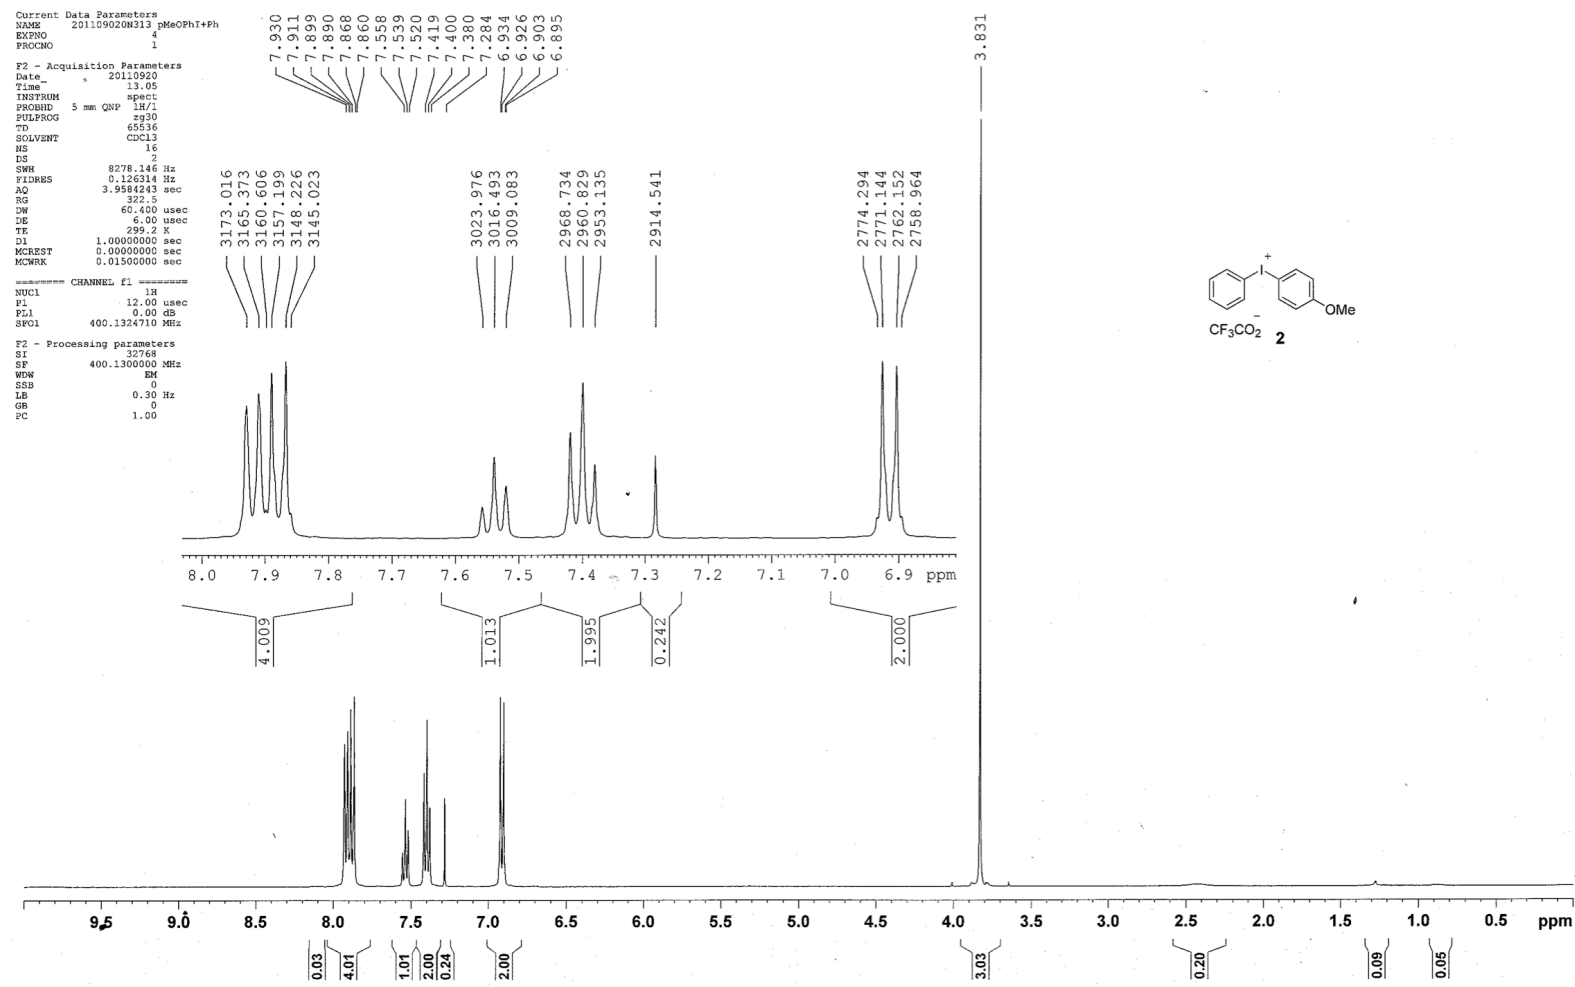

Current Data Parameters  
 NAME 201109020N313 pMeOPhI+Ph  
 EXPNO 3  
 PROCNO 1

## F2 - Acquisition Parameters

Date\_ 20110920  
 Time 12.57  
 INSTRUM spect  
 PROBRD 5 mm QNP 1H/1  
 PULPROG zgpg30  
 TD 65536  
 SOLVENT CDCl3  
 NS 1024  
 DS 4  
 SWH 23980.814 Hz  
 FIDRES 0.365918 Hz  
 AQ 1.3664756 sec  
 RG 1024  
 LW 20.850 usec  
 DE 6.00 usec  
 TE 299.2 K  
 D1 2.0000000 sec  
 d11 0.0300000 sec  
 DELTA 1.8999999 sec  
 MZREST 0.0000000 sec  
 MCXRC 0.0100000 sec

----- CHANNEL f1 -----  
 NUC1 13C  
 P1 10.00 usec  
 PL1 -3.00 dB  
 SFO1 100.6228298 MHz

----- CHANNEL f2 -----  
 CPDPRG2 waltz16  
 NU2 1H  
 PCPD2 80.00 usec  
 PL2 0.00 dB  
 PL12 17.00 dB  
 PL13 17.00 dB  
 SFO2 400.1318005 MHz

F2 - Processing parameters  
 SI 32768  
 SF 100.6127690 MHz  
 NH 2048  
 SSB 0  
 LB 1.00 Hz  
 GB 0  
 PC 1.40

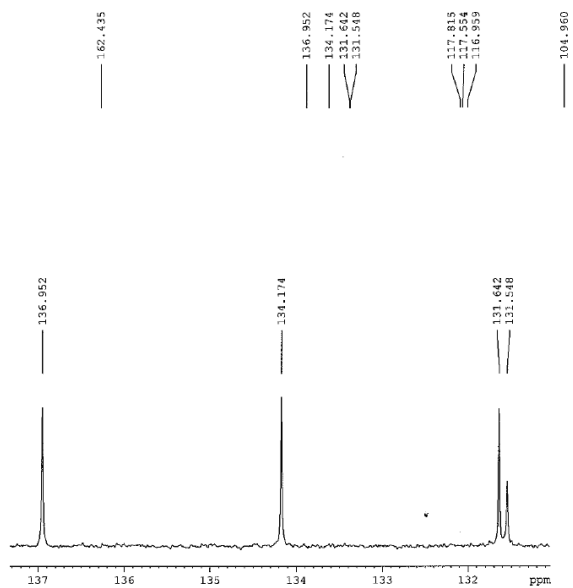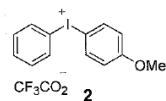

77.355  
77.243  
77.000  
76.758  
55.622

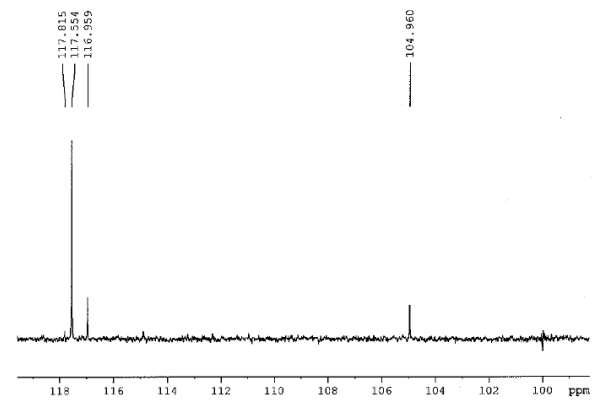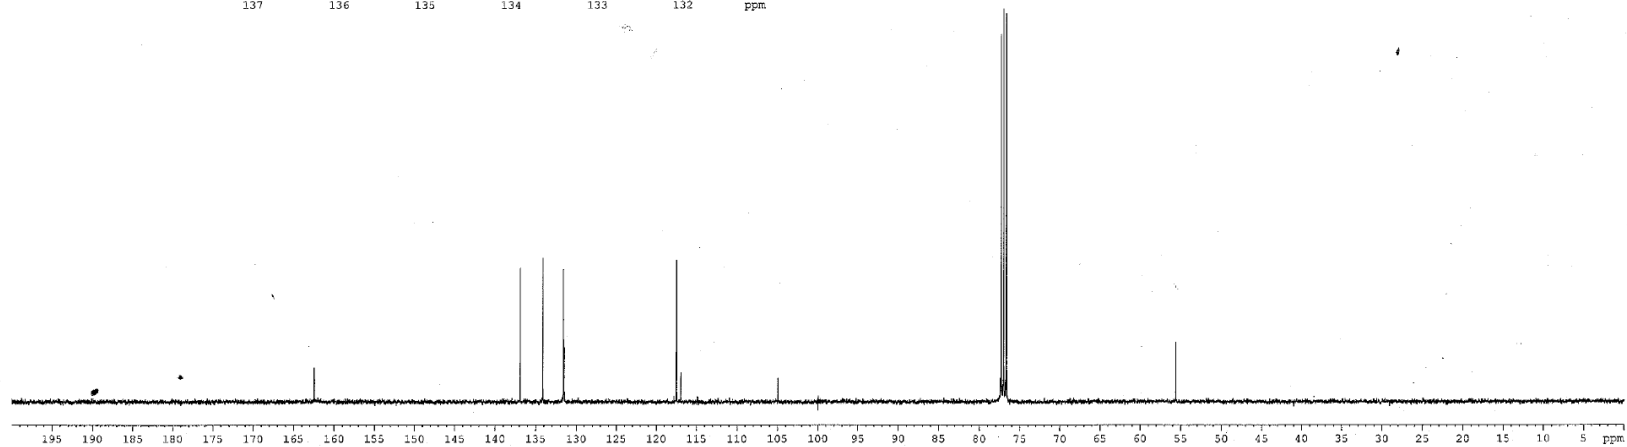

Current Data Parameters  
NAME 20110902CN313 pMeOPhI+Ph  
EXPNO 2  
PROCNO 1

F2 - Acquisition Parameters  
Date\_ 20110920  
Time 11.53  
INSTRUM spect  
PROBRD 5 mm QNP 1H/1  
PULPROG zgpg30  
TD 661496  
SOLVENT CDCl3  
NS 16  
DS 4  
SWH 75187.969 Hz  
FIDRES 0.125002 Hz  
AQ 3.9999983 sec  
RG 1024  
DW 6.650 usec  
DE 6.00 usec  
TE 298.2 K  
D1 1.0000000 sec

----- CHANNEL f1 -----  
NUC1 19F  
P1 12.50 usec  
PL1 -6.00 dB  
SFO1 376.4607044 MHz

F2 - Processing parameters  
SI 65536  
SF 376.4983540 MHz  
WDW EM  
SSB 0  
LB 0.30 Hz  
GB 0  
PC 1.00

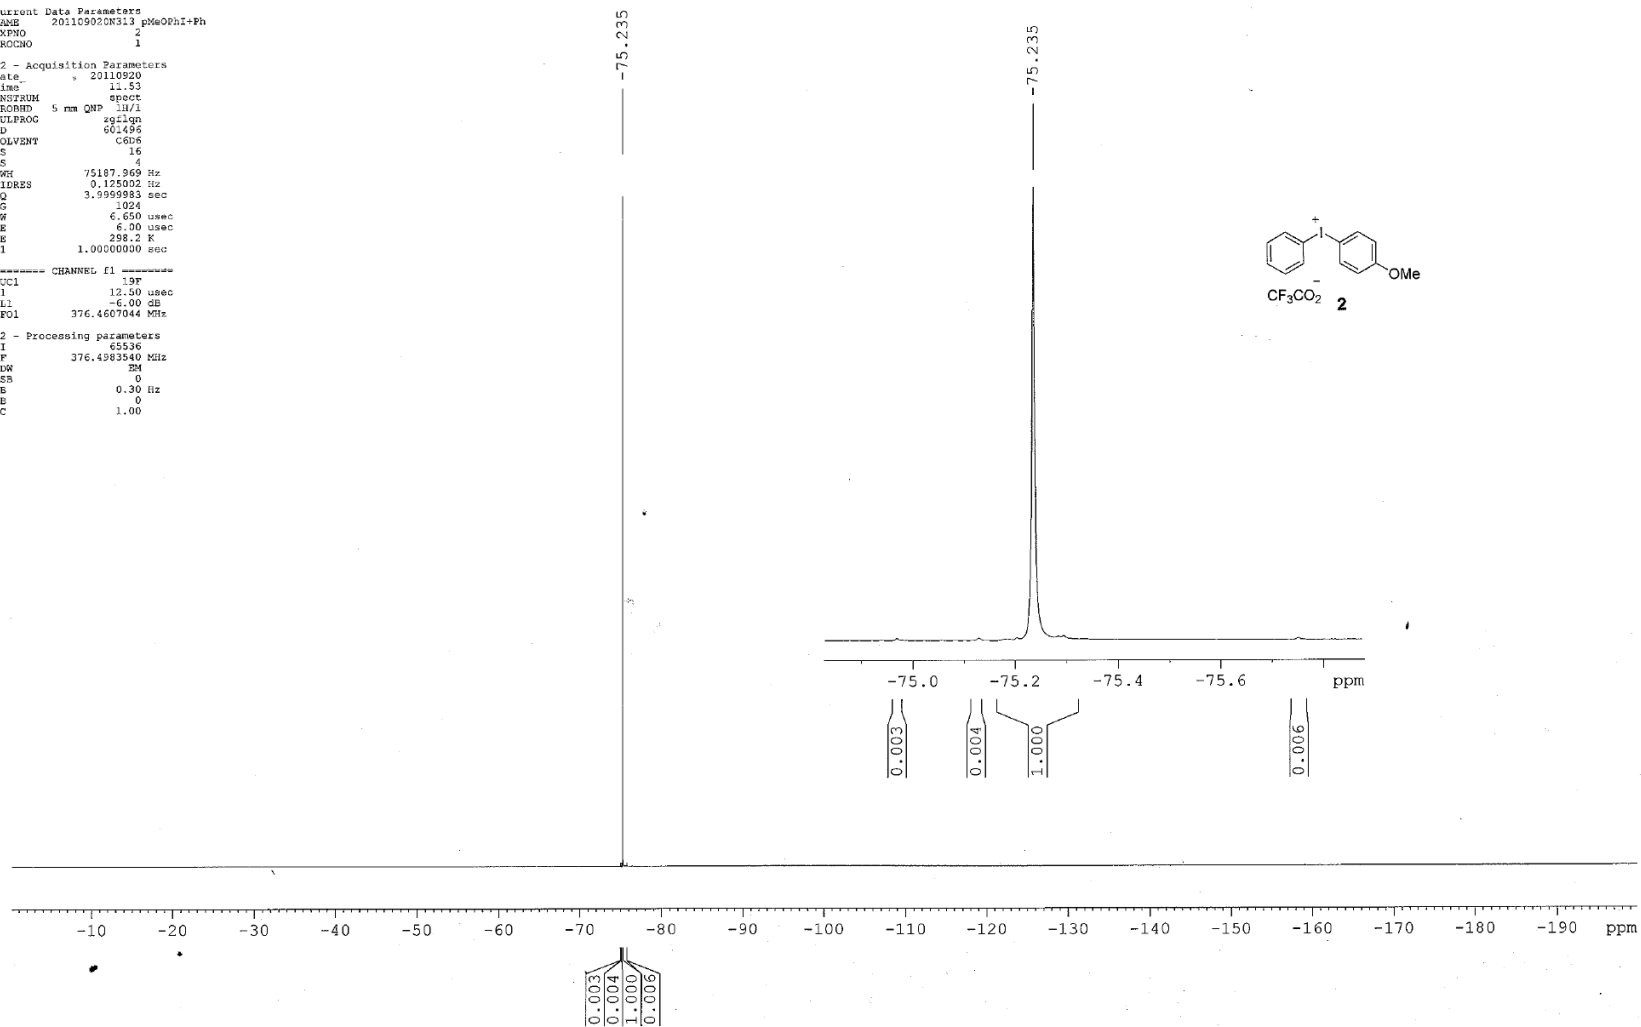

Current Data Parameters  
 NAME 20111014N329 AllBarbH  
 EXPNO 1  
 PROCNO 1

F2 - Acquisition Parameters  
 Date\_ 20111014  
 Time\_ 10.45  
 INSTRUM spect  
 PROBED 5 mm QNP 1H/1  
 PULPROG zg30  
 TD 65536  
 SOLVENT CDC13  
 NS 16  
 DS 2  
 SWH 8278.146 Hz  
 FIDRES 0.126314 Hz  
 AQ 3.9584243 sec  
 RG 287.0  
 DN 60.400 usec  
 DE 6.90 usec  
 TE 300.2 K  
 DL 1.0000000 sec  
 MCREST 0.0000000 sec  
 MCWRK 0.0150000 sec

===== CHANNEL f1 =====  
 NUC1 13  
 P1 12.00 usec  
 PL1 0.00 dB  
 SFO1 400.1324710 MHz

F2 - Processing parameters  
 SI 32768  
 SF 400.1300000 MHz  
 WM EM  
 SSB 0  
 LB 0.30 Hz  
 GB 0  
 PC 1.00

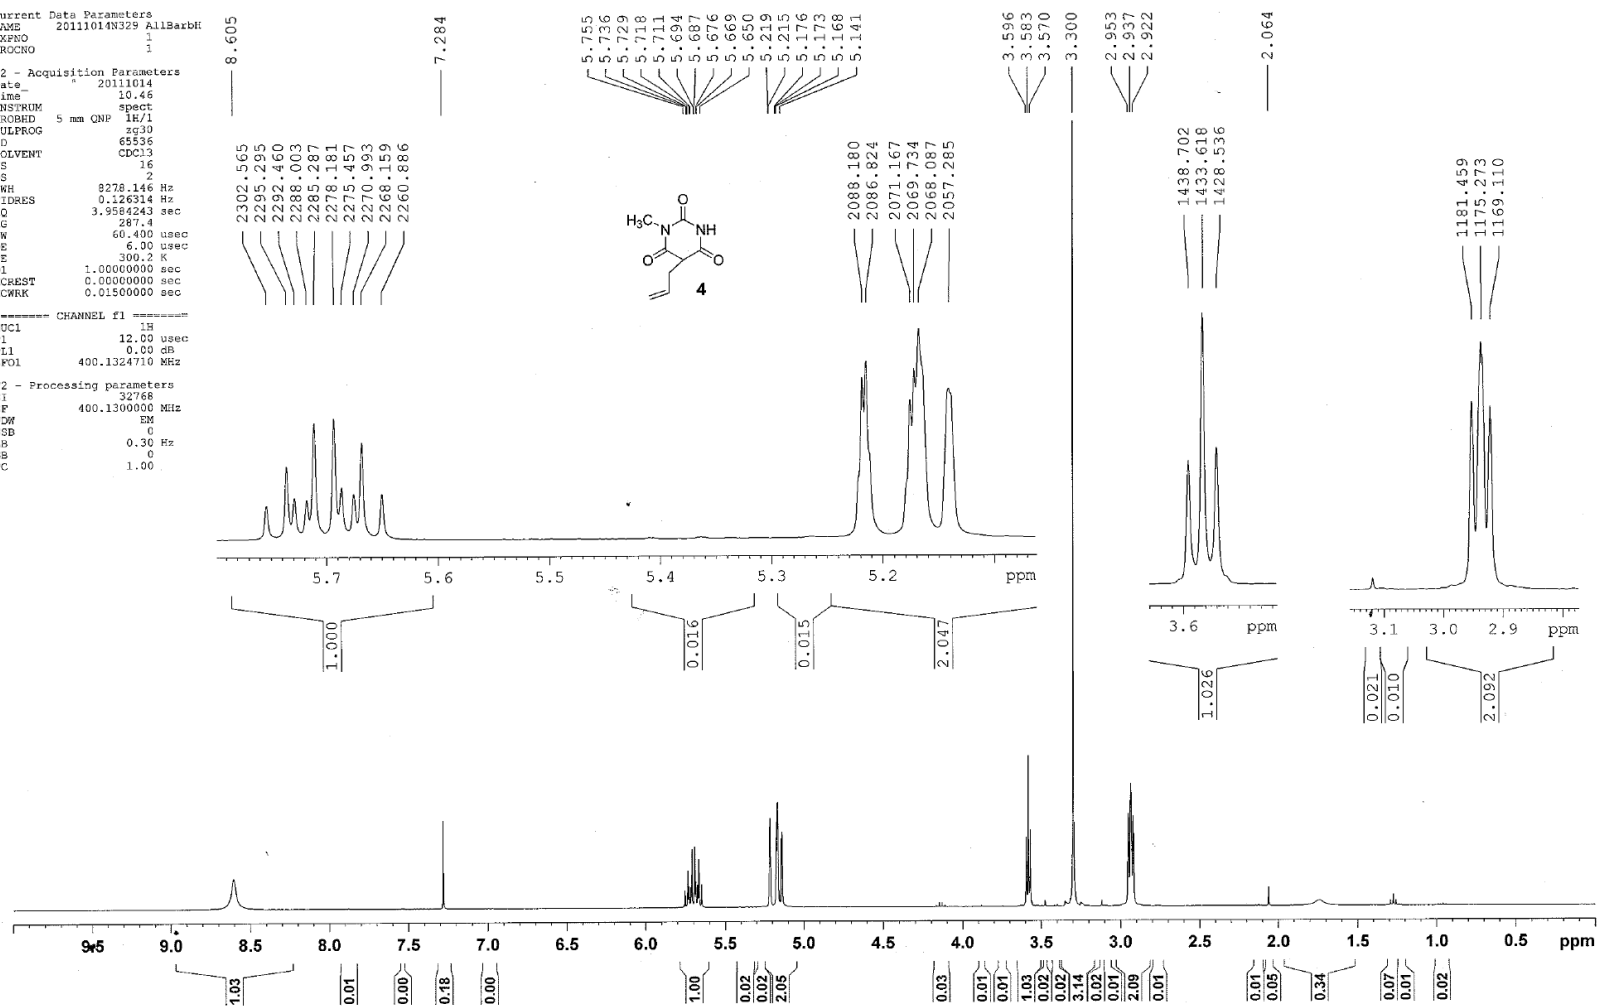



Current Data Parameters  
 NAME 201103110237 AllBarb.maj  
 EXPNO 7  
 PROCNO 1

F2 - Acquisition Parameters  
 Date 20110311  
 Time 15.34  
 INSTRUM spect  
 PROBHD 5 mm PABBO BB-  
 PULPROG zgpg30  
 TD 62836  
 SOLVENT CDCl3  
 NS 719  
 DS 4  
 SWH 23980.814 Hz  
 FIDRES 0.369918 Hz  
 AQ 1.3664758 sec  
 RG 912.7  
 SW 20.953 usec  
 DE 6.00 usec  
 TE 297.4 K  
 C1 2.0000000 sec  
 c11 0.0300000 sec  
 DELTA 1.8999999 sec  
 MCMST 0.0000000 sec  
 MCMRK 0.0150000 sec

----- CHANNEL f1 -----  
 NUC1 13C  
 P1 9.50 usec  
 PL1 -2.00 dB  
 SFO1 100.628888 MHz

----- CHANNEL f2 -----  
 CPDPRG2 waltz16  
 NUC2 1H  
 FPRO2 60.00 usec  
 PL2 -2.00 dB  
 PL12 14.30 dB  
 PL13 14.30 dB  
 SFO2 400.1716007 MHz

F2 - Processing parameters  
 SI 32768  
 SF 100.6282270 MHz  
 MFM FM  
 SSR 0  
 LB 1.00 Hz  
 GB 0  
 PC 1.40

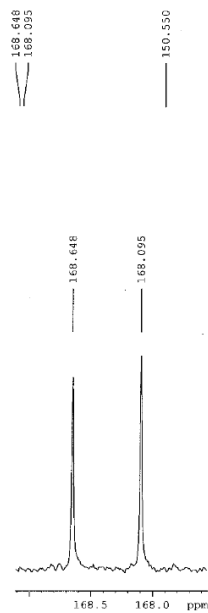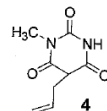

77.371  
77.054  
76.736

60.453

48.771

34.185

27.965  
27.771

21.047

14.180

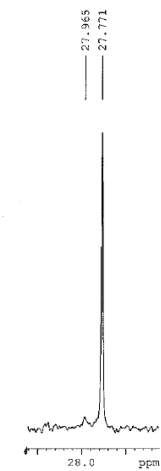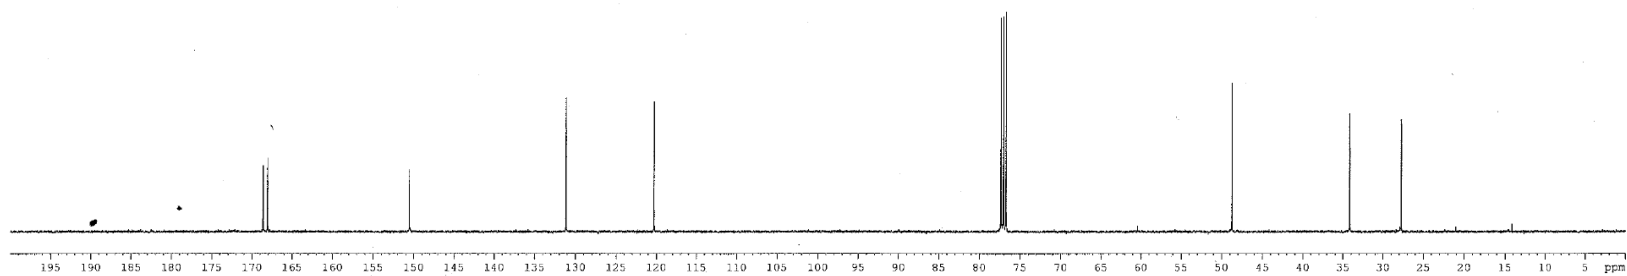

Current Data Parameters  
 NAME 201118N347e248 fmBarball  
 EXFNO 1  
 PROCNO 1

F2 - Acquisition Parameters  
 Date \* 20111118  
 Time 14.41  
 INSTRUM spect  
 FPROG 5 mm QNP 1H/1  
 PULPROG zgpg30  
 TD 65536  
 SOLVENT CDCl3  
 NS 1024  
 DS 4

SWH 23980.814 Hz  
 FIDRES 0.365918 Hz  
 AQ 1.3664756 sec  
 RG 1448.2  
 DW 20.850 usec  
 DE 6.00 usec  
 TE 299.2 K  
 DL 2.0000000 sec  
 d11 0.3300000 sec  
 DELTA 1.89999998 sec  
 MCREST 0.0000000 sec  
 MCHXK 0.01500000 sec

==== CHANNEL f1 =====  
 NUC1 13C  
 P1 10.00 usec  
 PL1 -3.00 dB  
 SFO1 100.6228209 MHz

==== CHANNEL f2 =====  
 CPDPRG2 waltz16  
 NUC2 1H  
 FCPDZ 80.00 usec  
 PL2 0.00 dB  
 PL12 17.00 dB  
 PL13 17.00 dB  
 SFO2 400.1316005 MHz

F2 - Processing parameters  
 SI 32768  
 SF 100.6127690 MHz  
 WDW EM  
 SSB 0  
 LB 1.00 Hz  
 GB 0  
 PC 1.40

170.442  
 169.663

150.055

136.956

131.376

129.260

128.779

126.188

121.346

77.394  
 77.278  
 77.076  
 76.758

61.074

40.622

28.250

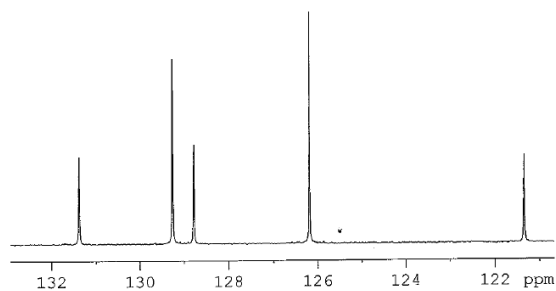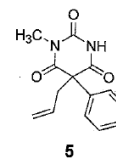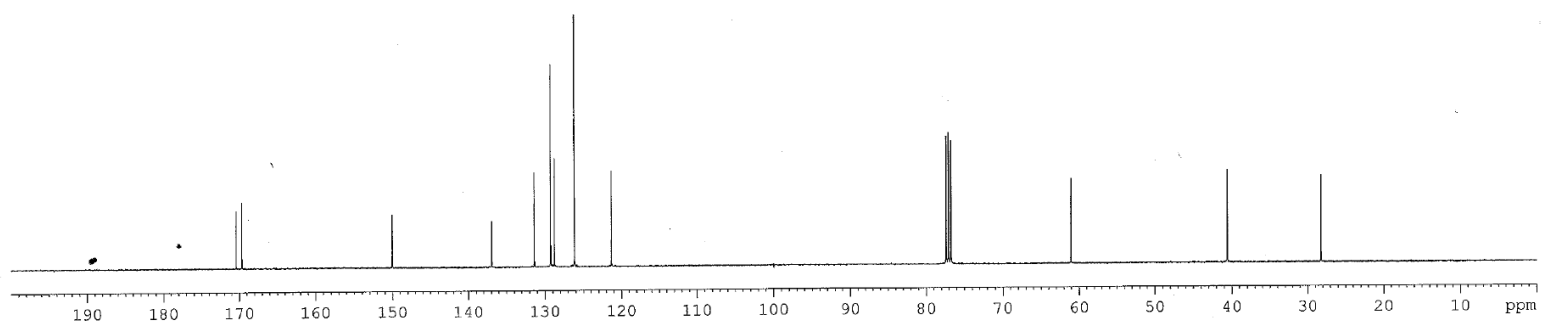

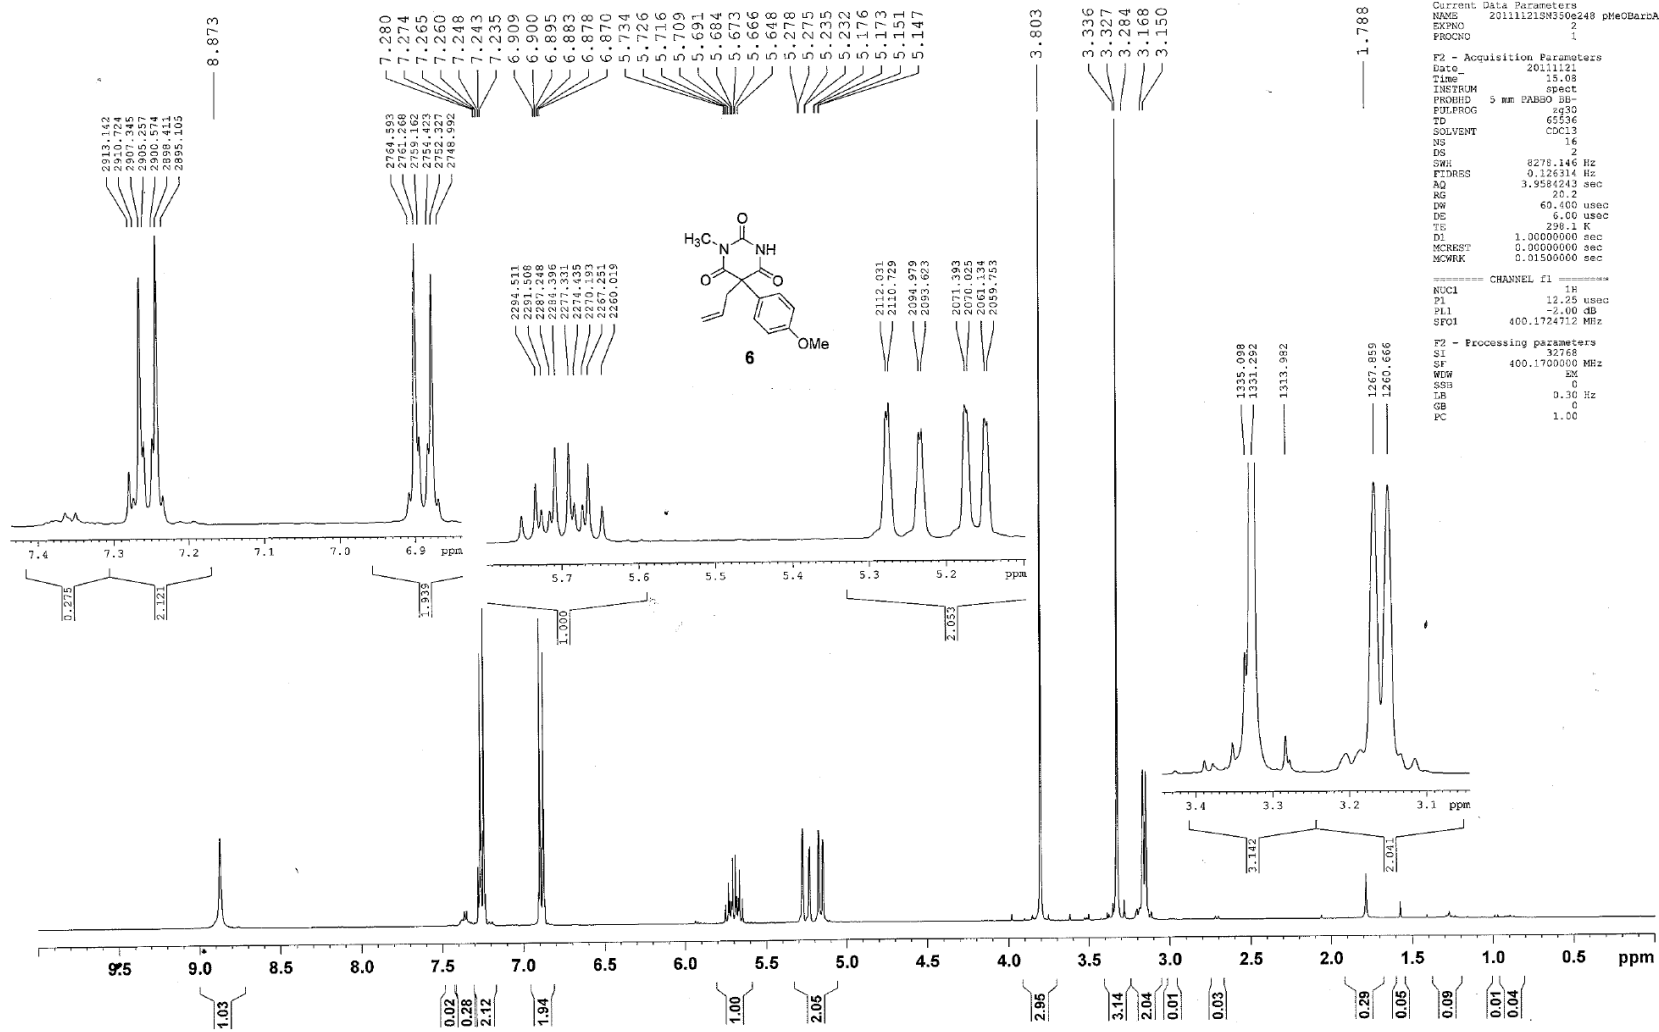

Current Data Parameters  
 NAME 2011121818356248 pMeOGrh11  
 EXPNO 3  
 PROCNO 1

F2 - Acquisition Parameters  
 Date\_ 20111211  
 Time 16.13  
 INSTRUM spect  
 PROBRD 5 mm F4BBO BB-  
 PULPROG zgpg30  
 TD 65536  
 FID 65536  
 SOLVENT CDCl3  
 NS 952  
 DS 4

SF 23980.814 Hz  
 FIDRES 0.365918 Hz  
 AQ 1.3666756 sec  
 RS 912.3  
 DM 20.880 usec  
 DE 6.00 usec  
 TE 298.6 K  
 D1 2.0000000 sec  
 d11 0.0300000 sec  
 DELTA 1.6999998 sec  
 ACQRES 0.0000000 sec  
 MCNRES 0.0100000 sec

----- CHANNEL f1 -----  
 NUC1 13C  
 P1 9.50 usec  
 PL1 2.00 dB  
 SFO1 100.628888 MHz

----- CHANNEL f2 -----  
 CPDPRG2 waltz16  
 NUC2 1H  
 PCPD2 80.90 usec  
 PL2 -2.00 dB  
 PL12 16.30 dB  
 PL13 16.00 dB  
 SFO2 400.1716007 MHz

F2 - Processing parameters  
 SI 32768  
 SF 100.6228270 MHz  
 NDM 0  
 SSB 0  
 LB 3.00 Hz  
 GB 0  
 PC 1.40

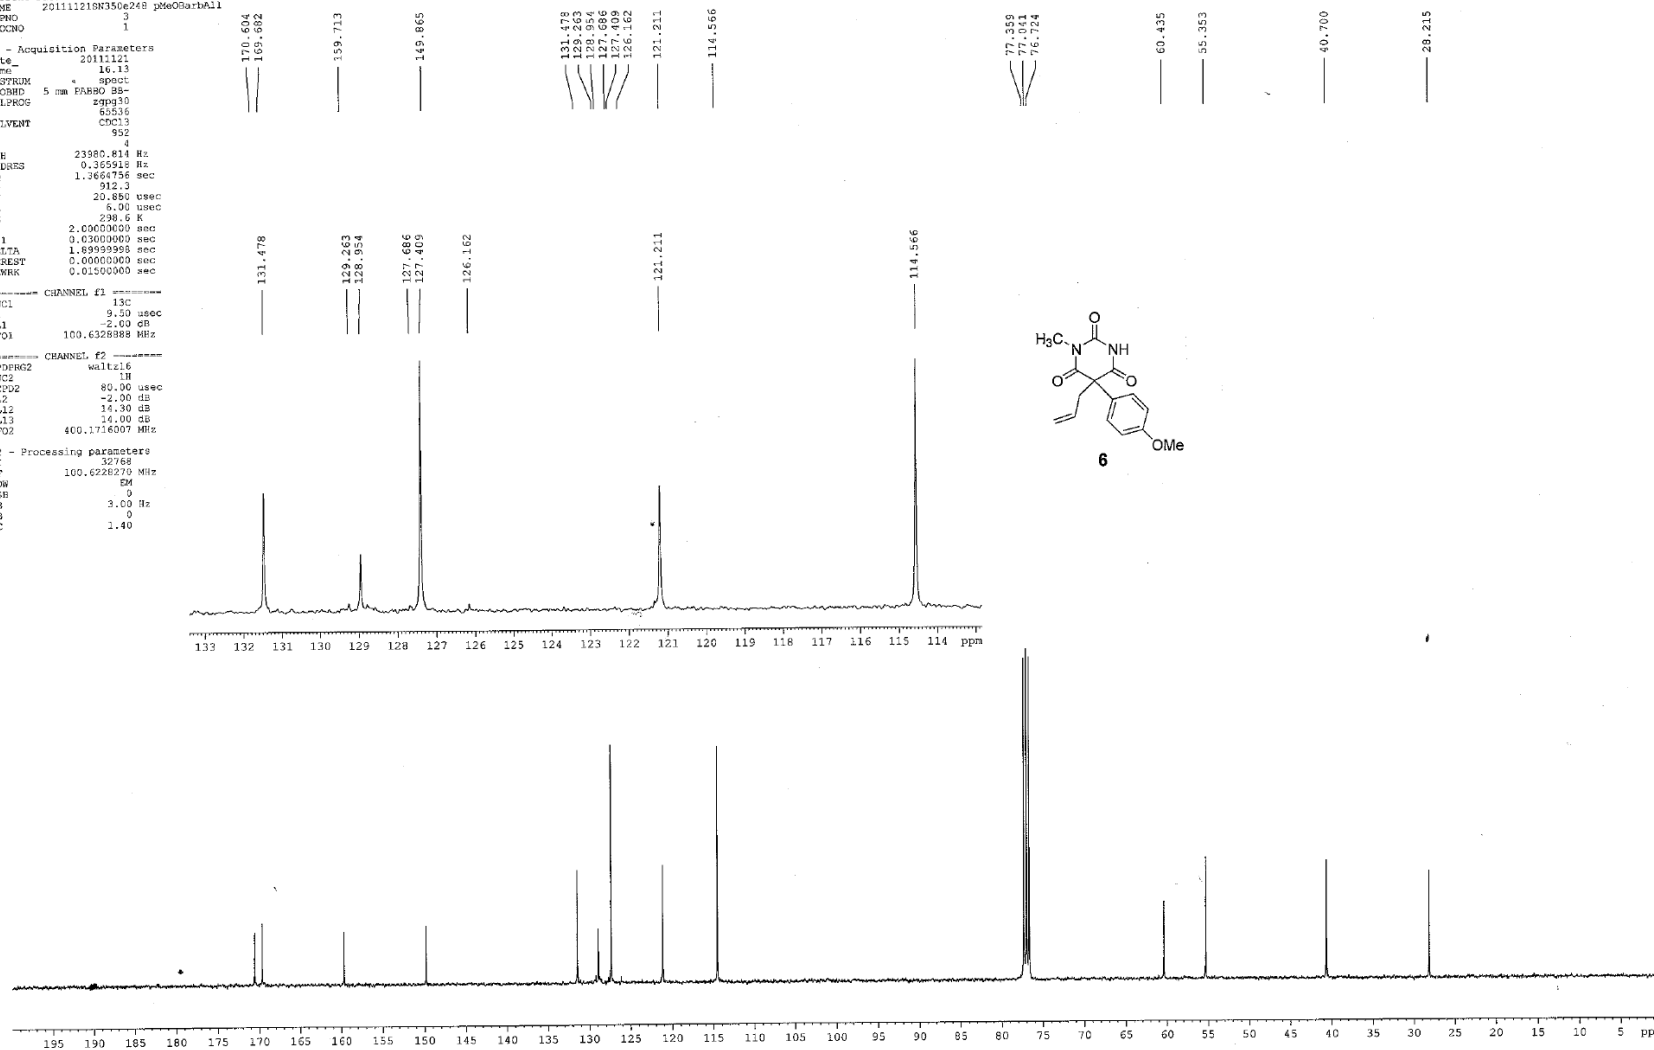

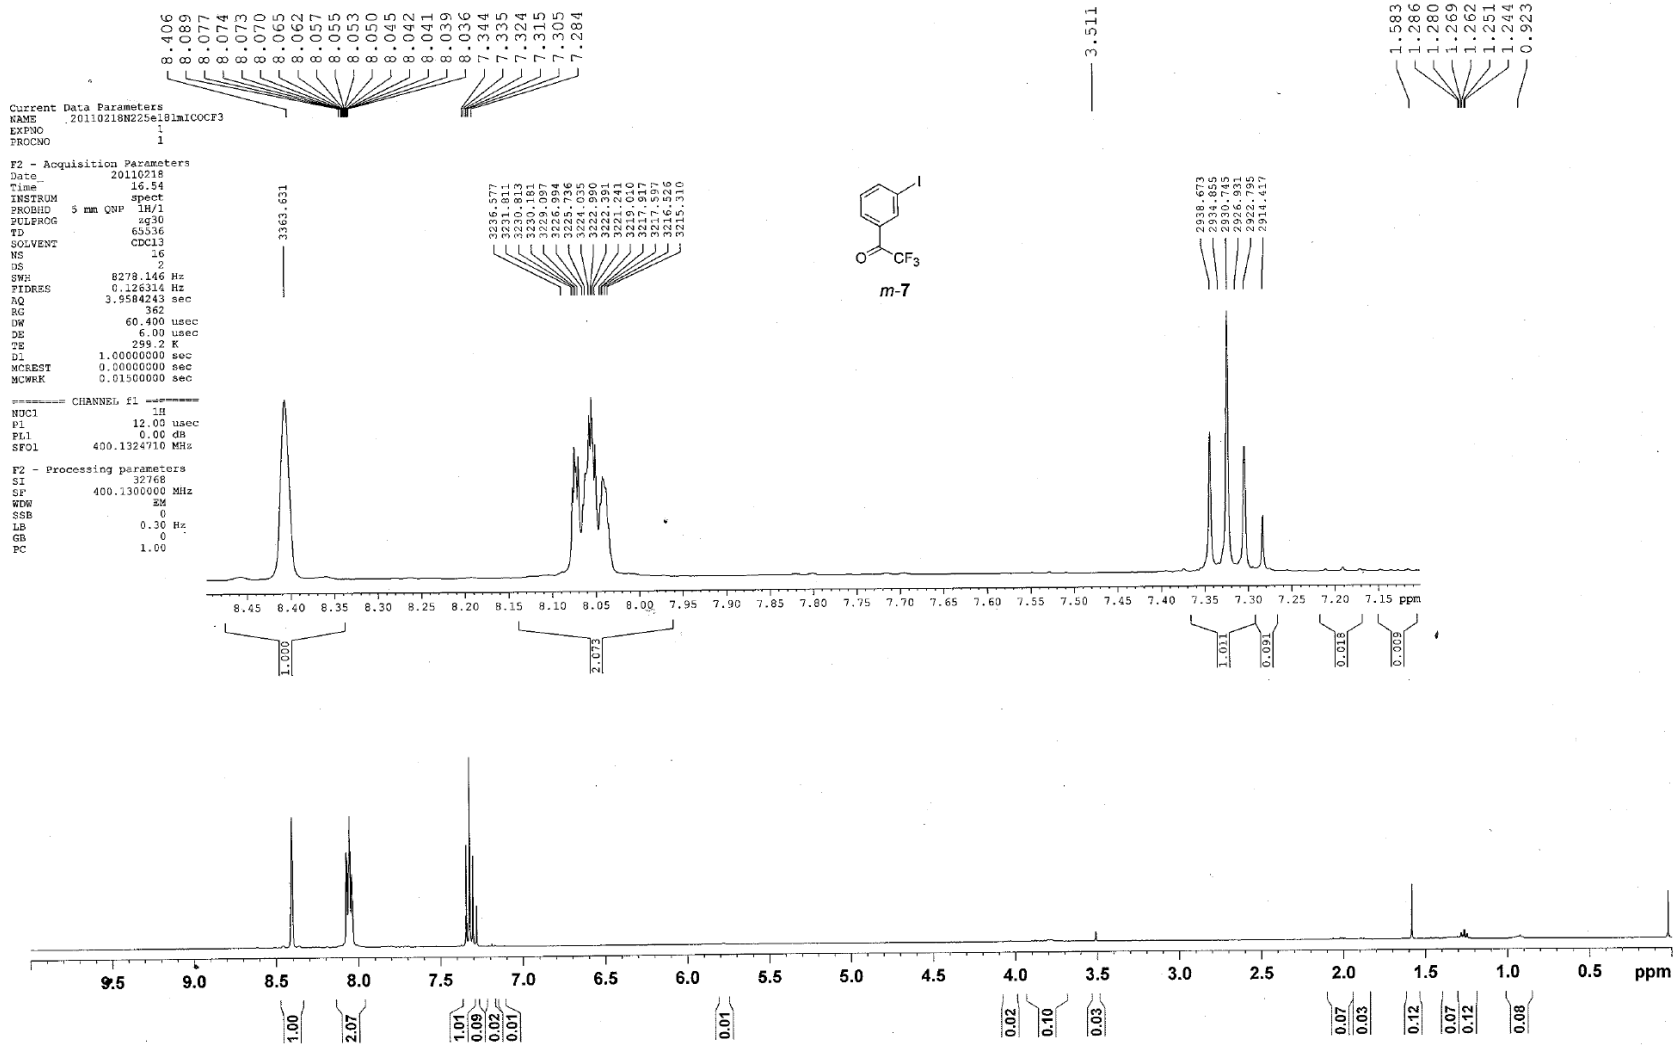

Current Data Parameters  
 NAME 20110218M256181m7COCF3  
 EXPNO 3  
 PROCNO 1

F2 - Acquisition Parameters  
 Date\_ 20110218  
 Time 17.29  
 INSTRUM spect  
 PROBRD 5 mm QNP 1H/1  
 PULPROG zgpg30  
 VD 8536  
 SOLVENT CDC13  
 NS 941  
 DS 4  
 SMH 23980.814 Hz  
 FIDRES 0.365918 Hz  
 AQ 1.3664756 sec  
 RG 645.1  
 DW 20.850 usec  
 DE 6.00 usec  
 TK 299.2 K  
 D1 2.00000000 sec  
 d11 0.03000000 sec  
 DELTA 1.89999999 sec  
 MCHSPT 0.00000000 sec  
 MCWRR 0.01500000 sec

----- CHANNEL f1 -----  
 NUC1 13C  
 P1 10.00 usec  
 PL1 -3.00 dB  
 SFO1 100.6228298 MHz

----- CHANNEL f2 -----  
 CPDPRG2 waltz16  
 NUC2 1H  
 PCPD2 80.00 usec  
 PL2 0.00 dB  
 PL12 17.00 dB  
 PL13 17.00 dB  
 SFO2 400.1316005 MHz

F2 - Processing parameters  
 S1 82768  
 SF 100.6127690 MHz  
 MDW EM  
 SSB 0  
 LB 1.00 Hz  
 GB 0  
 PC 1.40

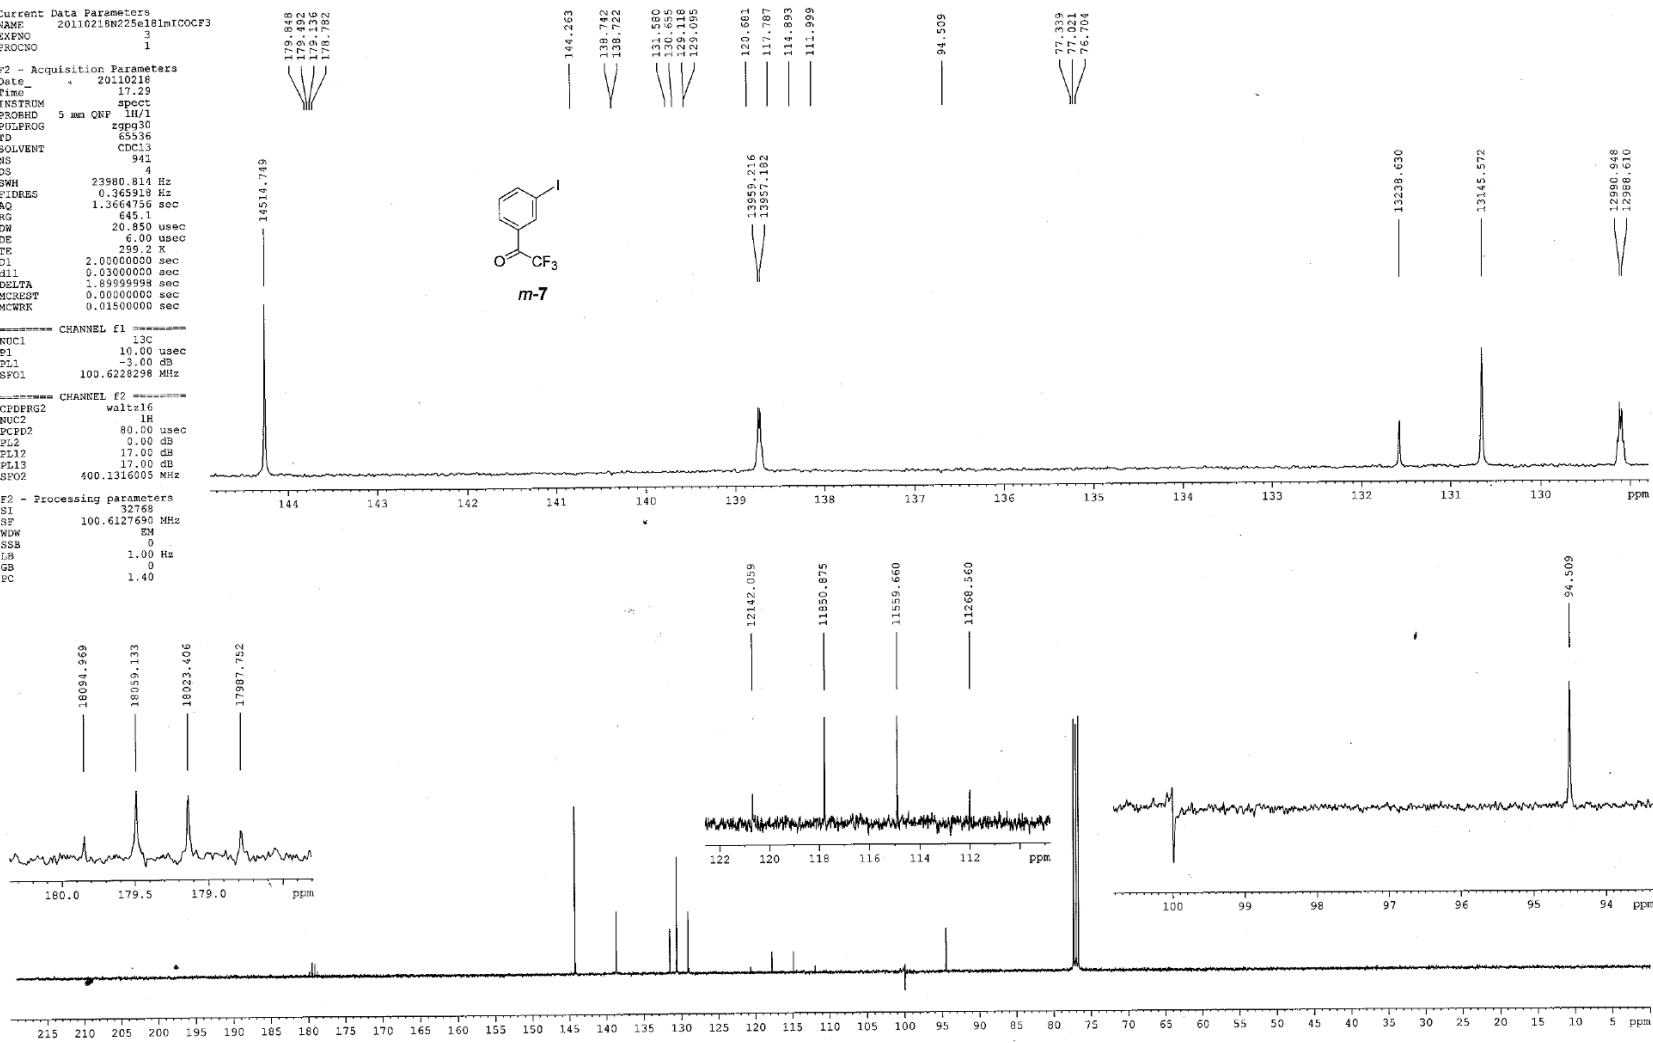

F19

Current Data Parameters  
NAME 20110218M25s191m100CF3  
EXTNO 2  
PROCNO 1

F2 - Acquisition Parameters  
Date 20110218  
Time 17.00  
INSTRUM spect  
PROBHD 5 mm QNP 1H/1  
PULPROG zgpg30  
TD 601496  
SOLVENT CDCl3  
NS 16  
DS 4  
SWH 75187.969 Hz  
FIDRES 0.125002 Hz  
AQ 3.9999983 sec  
RG 574.7  
DW 6.530 usec  
DE 6.00 usec  
TE 299.2 K  
D1 1.0000000 sec

===== CHANNEL f1 =====  
NUC1 13C  
P1 12.50 usec  
PL1 -6.00 dB  
SFO1 376.4607044 MHz

F2 - Processing parameters  
SI 65536  
SF 376.4983540 MHz  
WDW EM  
SSB 0  
LB 0.30 Hz  
GB 0  
PC 1.00

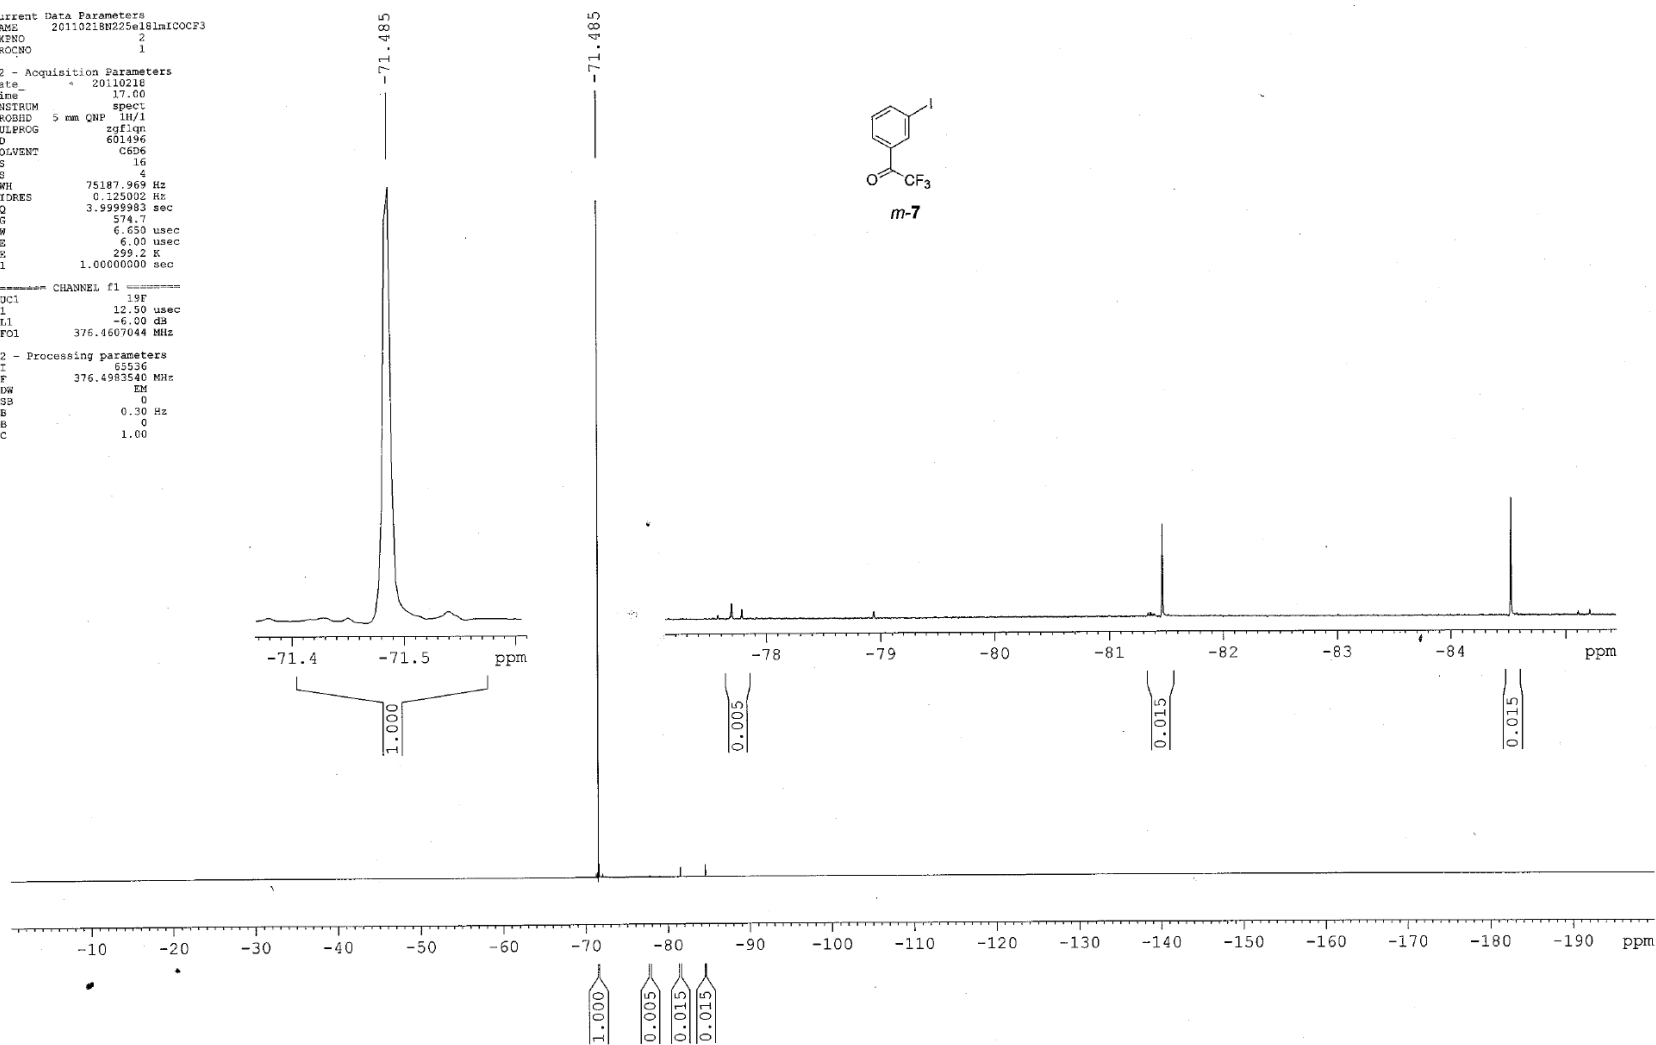

Current Data Parameters  
 NAME 201109019N311 p1PhCOCF3  
 EXFNO 1  
 PROCNO 1

F2 - Acquisition Parameters  
 Date\_ 20110919  
 Time\_ 15.51  
 INSTRUM spect  
 PROBEID 5 mm QNP 1H/1  
 PULPROG zg30  
 CD 65536  
 SOLVENT CDCl3  
 NS 16  
 DS 2  
 SWH 8278.146 Hz  
 FIDRES 0.126314 Hz  
 AQ 3.858443 sec  
 RG 228.1  
 DW 60.400 usec  
 DE 6.00 usec  
 TE 298.2 K  
 DL 1.00000000 sec  
 MCNRET 0.00000000 sec  
 MCNRR 0.01500000 sec

CHANNEL f1 =====  
 NUC1 1H  
 P1 12.00 usec  
 PL1 0.00 dB  
 SFO1 400.1324710 MHz

F2 - Processing parameters  
 SI 32768  
 SF 400.1300000 MHz  
 WDW EM  
 SSB 0  
 LB 0.30 Hz  
 GB 0  
 PC 1.00

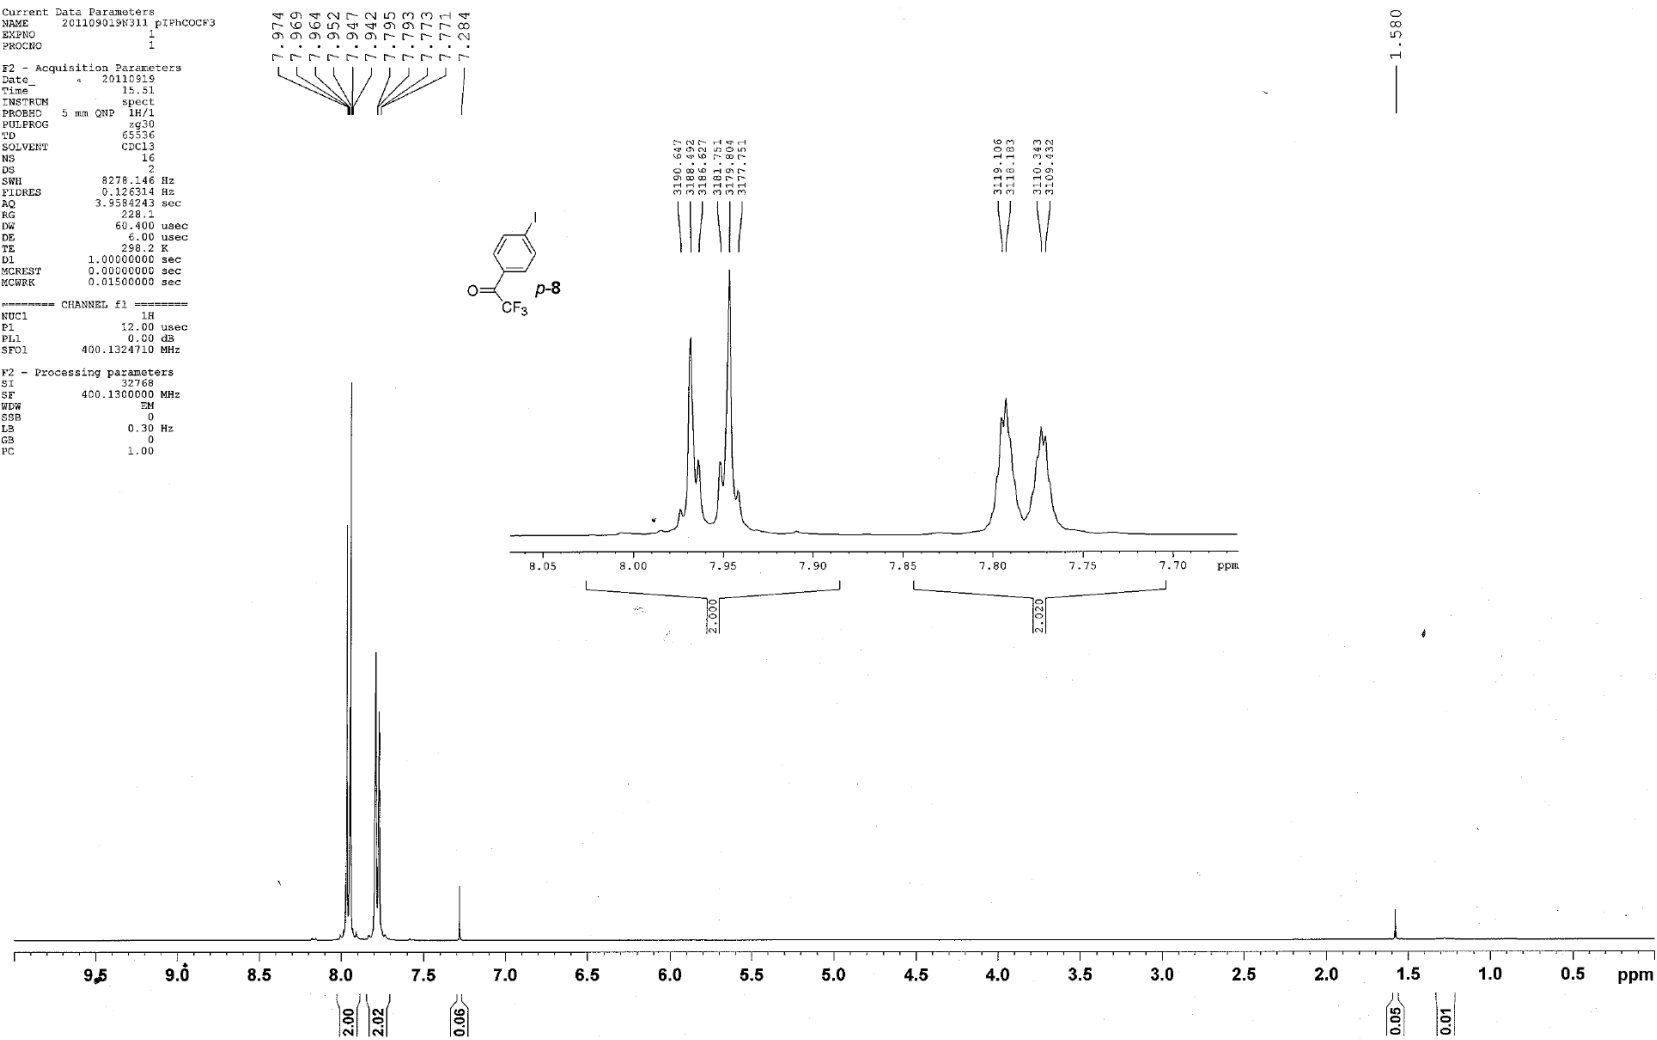



Current Data Parameters  
 NAME 201109019N311 pIPhCOCF3  
 EXPNO 3  
 PROCNO 1

F2 - Acquisition Parameters  
 Date\_ 20110919  
 Time 16.58  
 INSTRUM spect  
 PROBHD 5 mm QNP 1H/1  
 PULPROG zgpg30  
 TD 65536  
 SOLVENT cdcl3  
 NS 1024  
 DS 4  
 SWH 23980.814 Hz  
 FIDRES 0.365918 Hz  
 AQ 1.3664756 sec  
 RG 724.1  
 DW 20.850 usec  
 DE 6.00 usec  
 TE 299.2 K  
 D1 2.0000000 sec  
 d11 0.0300000 sec  
 DELTA 1.8999999 sec  
 MCREST 0.0000000 sec  
 MCWRK 0.0150000 sec

CHANNEL F1  
 NUC1 13C  
 P1 10.00 usec  
 PL1 -3.00 dB  
 SFO1 100.6228298 MHz

CHANNEL F2  
 CPDPRG2 waltz16  
 NUC2 1H  
 PCPD2 80.00 usec  
 PL2 0.00 dB  
 PL12 17.00 dB  
 PL13 17.00 dB  
 SFO2 400.1315003 MHz

F2 - Processing parameters  
 SI 32768  
 SF 100.6127690 MHz  
 WDW EM  
 SSB 0  
 LB 1.00 Hz  
 GB 0  
 PC 1.40

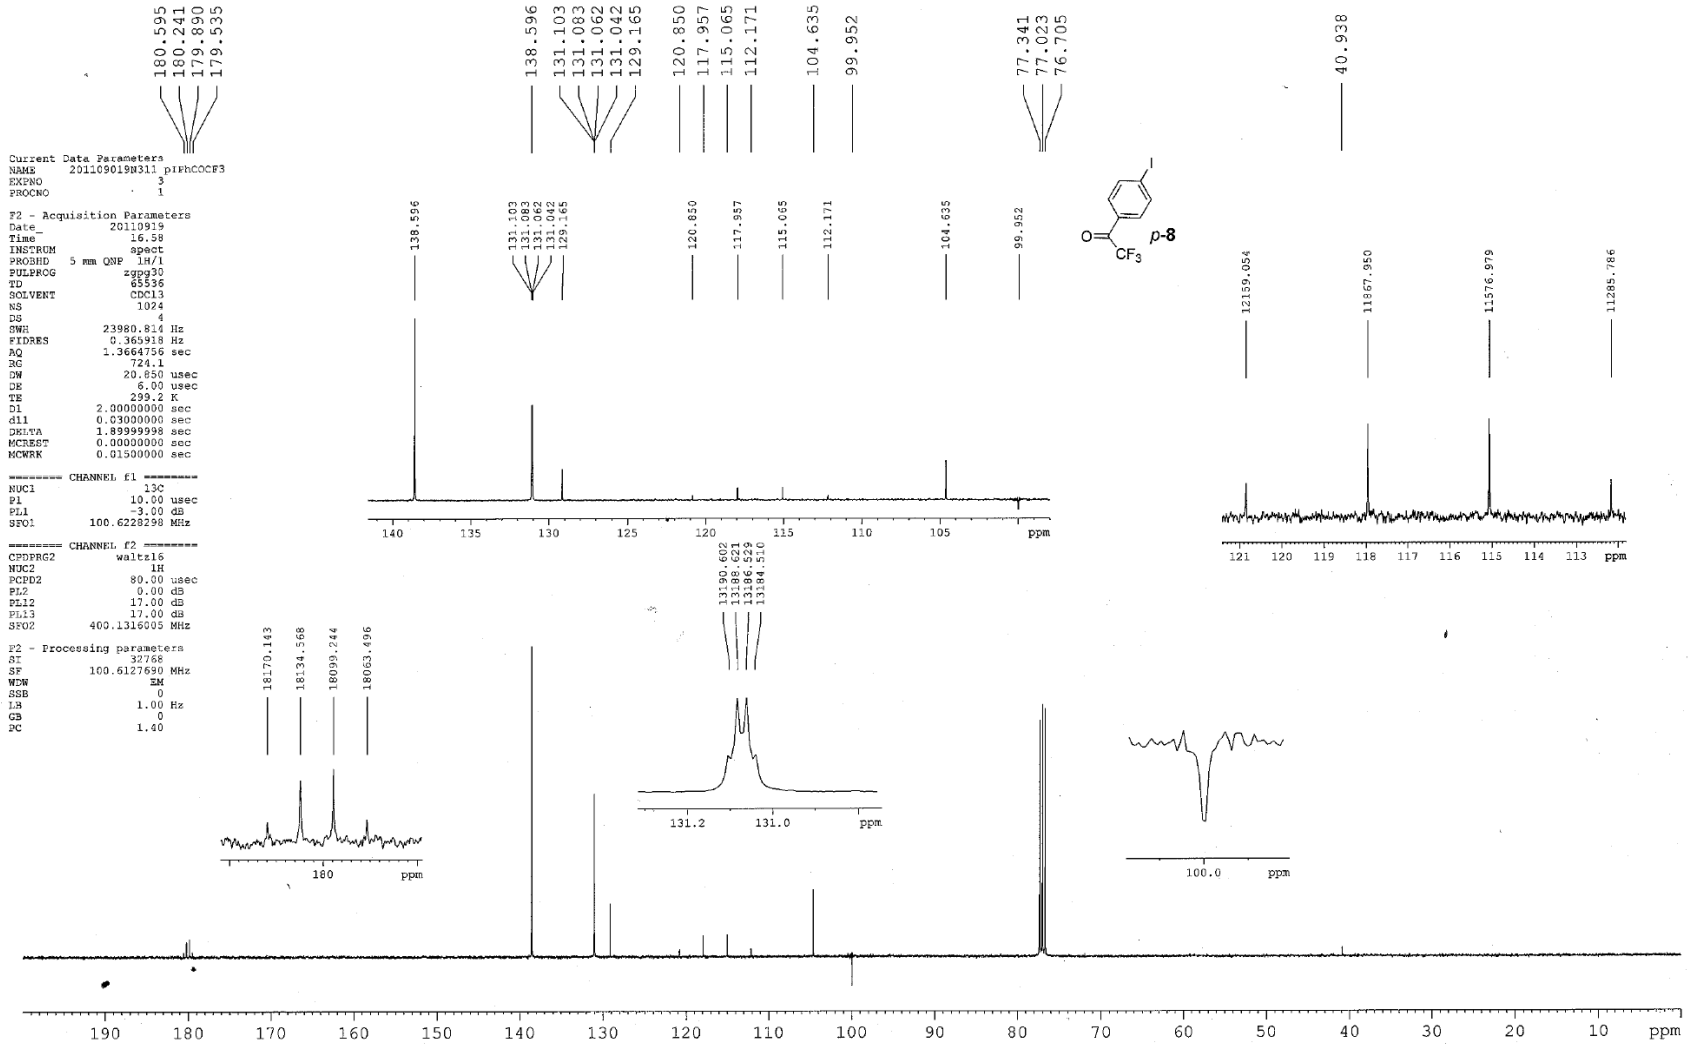

Current Data Parameters  
NAME 201109019K311 p1PhCOCF3  
EXPNO 2  
PROCNO 1

F2 - Acquisition Parameters  
Date\_ 20110919  
Time 15.55  
INSTRUM spect  
PROBHD 5 mm QNP 1H/1  
PULPROG zgpg30  
TD 451120  
SOLVENT C6D6  
NS 16  
DS 4  
SWH 75187.969 Hz  
FIDRES 0.166670 Hz  
AQ 2.9999981 sec  
RG 512  
DW 6.650 usec  
DE 6.00 usec  
TE 298.2 K  
D1 1.0000000 sec

===== CHANNEL f1 =====  
NUC1 19F  
P1 12.50 usec  
PL1 -6.00 dB  
SFO1 376.4607044 MHz

F2 - Processing parameters  
SI 65536  
SF 376.4983540 MHz  
WDW EM  
SSB 0  
LB 0.30 Hz  
GB 0  
PC 1.00

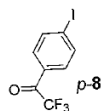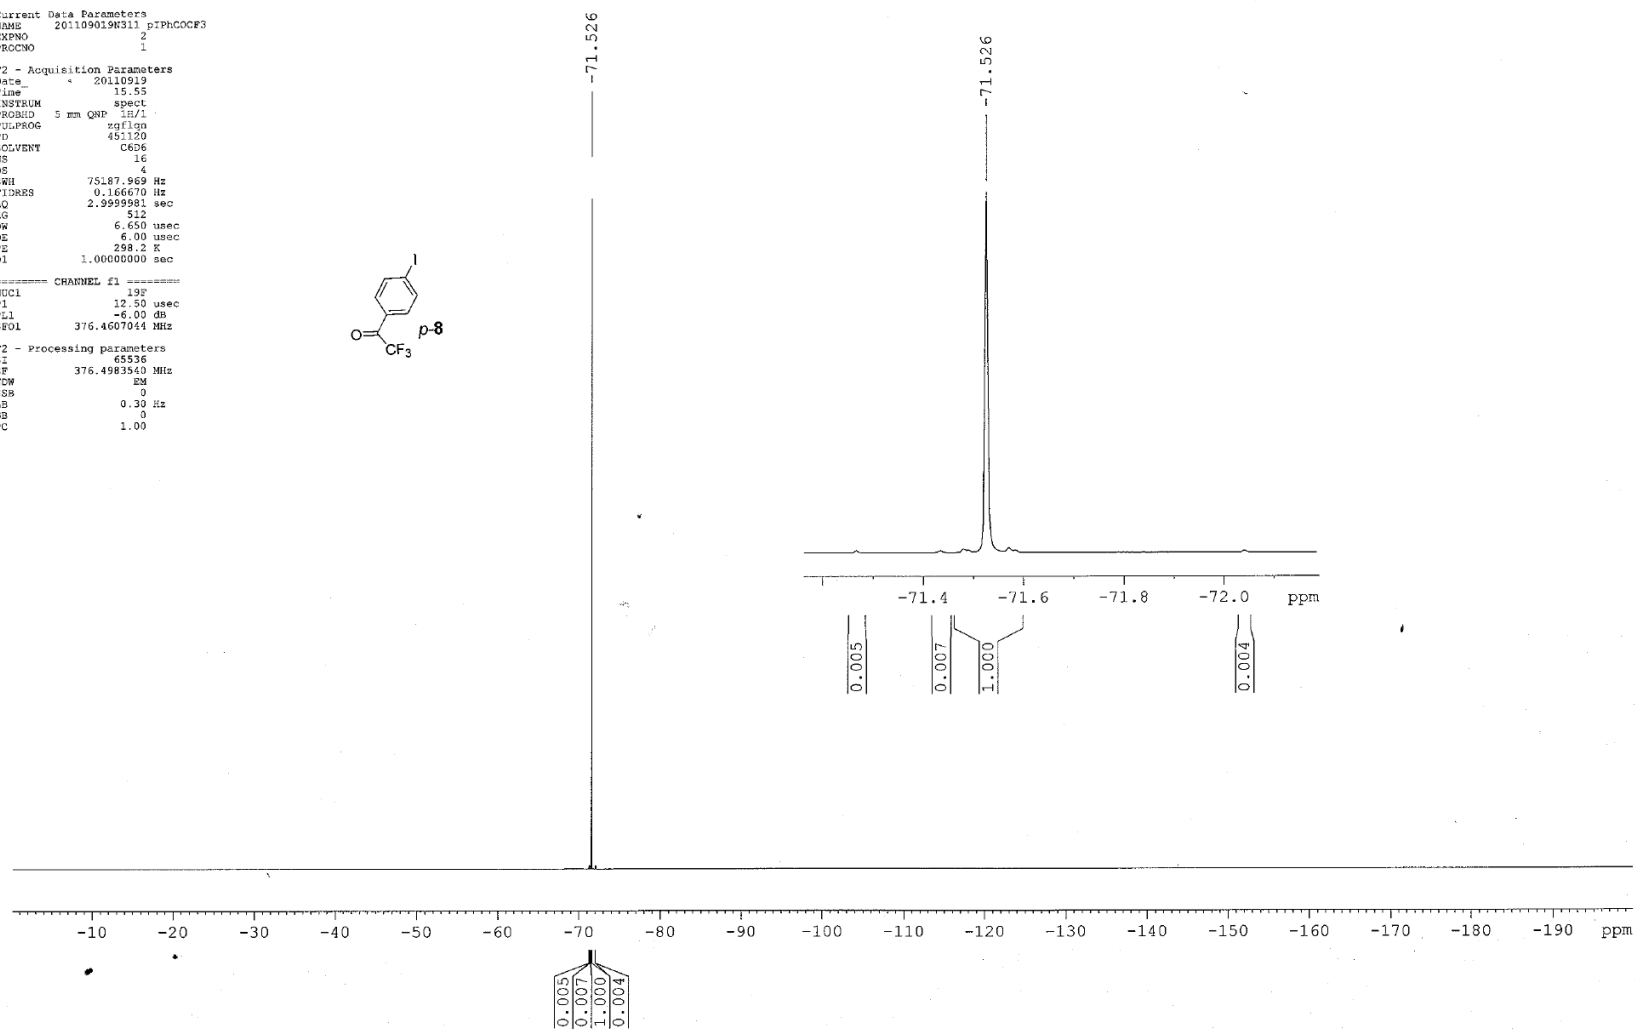

Current Data Parameters  
 NRME 20110907N308 mDPHI  
 EXPNO 1  
 PROCNO 1

F2 - Acquisition Parameters  
 Date\_ 20110907  
 Time\_ 11.19  
 INSTRUM spect  
 PROBHD 5 mm QNP 1H/1  
 PULPROG zg30  
 TD 65536  
 SOLVENT CDCl3  
 NS 16  
 DS 2  
 SWH 8278.146 Hz  
 FIDRES 0.125314 Hz  
 AQ 3.9584243 sec  
 RG 228.1  
 DW 60.400 usec  
 DE 6.00 usec  
 TE 298.2 K  
 D1 1.00000000 sec  
 MCREST 0.00000000 sec  
 MCWRRK 0.01500000 sec

===== CHANNEL f1 =====  
 NUC1 1H  
 P1 12.00 usec  
 PL1 0.00 dB  
 SFO1 400.1324710 MHz

F2 - Processing parameters  
 SI 32768  
 SF 400.1300000 MHz  
 WDW EM  
 SSB 0  
 LB 0.30 Hz  
 GB 0  
 PC 1.00

7.794  
7.775  
7.723  
7.517  
7.284  
7.250  
7.249  
7.229  
7.205  
7.173  
7.154  
7.134  
7.104

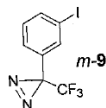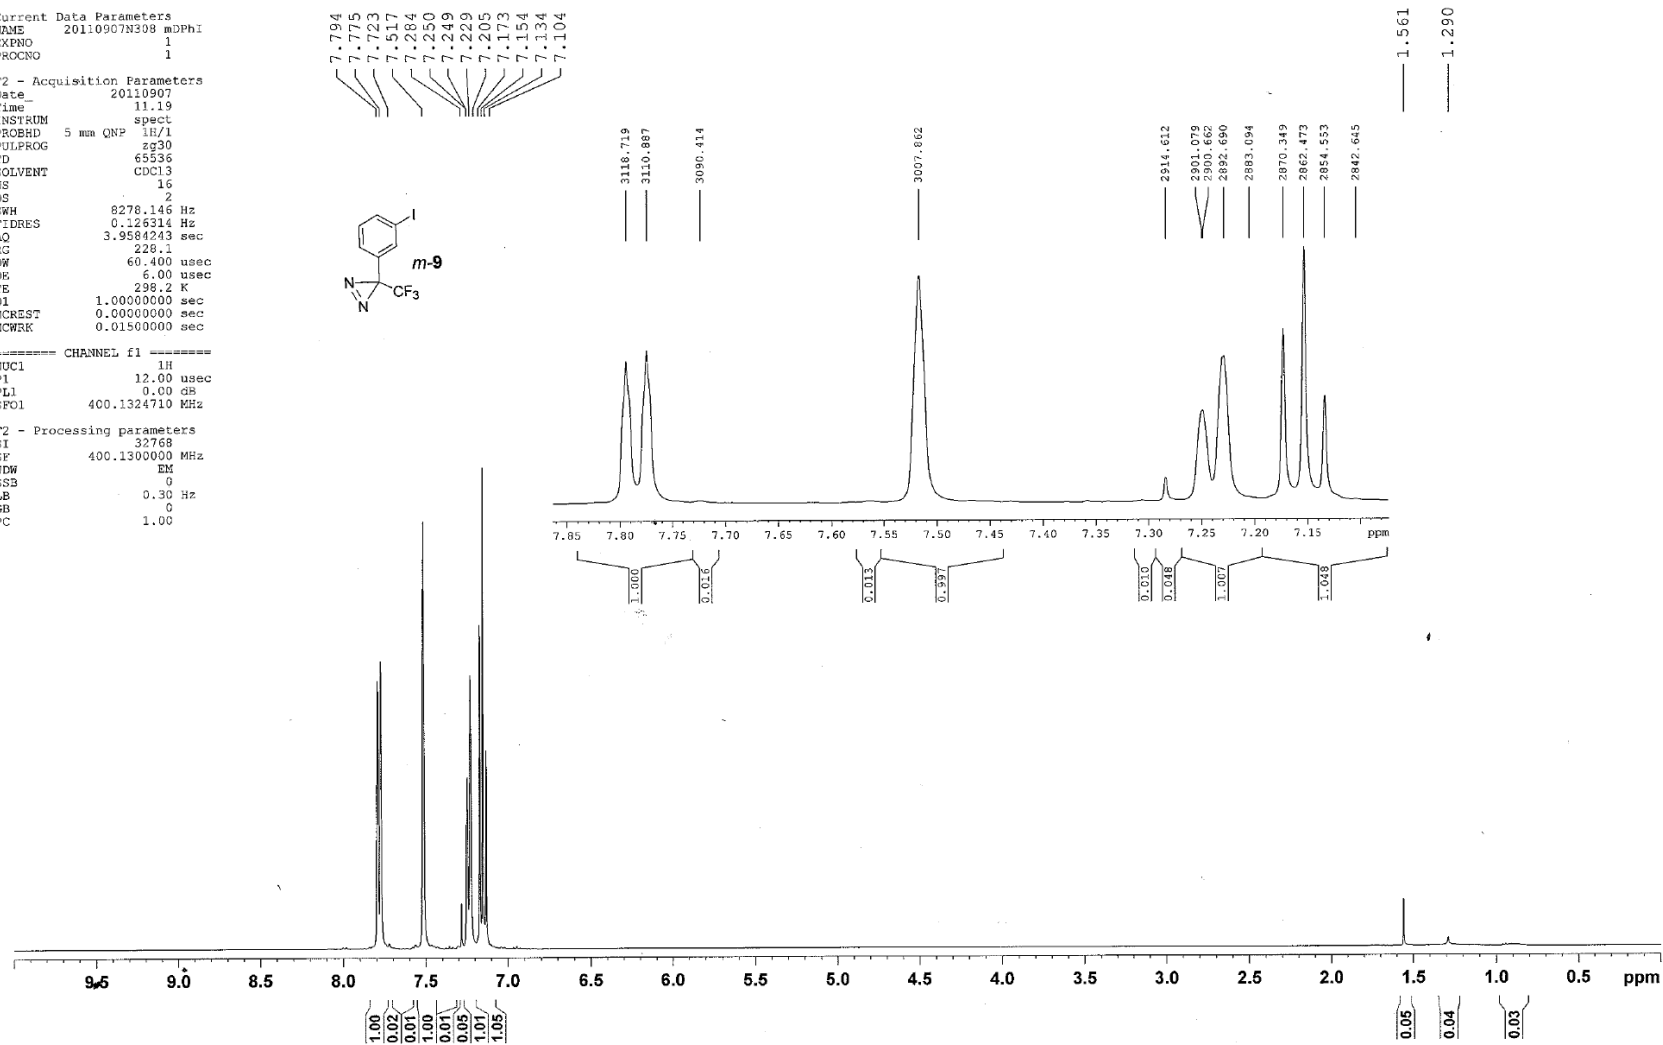

Current Data Parameters  
 NAME 20110907N308 mDPHI  
 EXPNO 3  
 PROCNO 1

F2 - Acquisition Parameters  
 Date 20110907  
 Time 13.00  
 INSTRUM spect  
 PROBHD 5 mm QNP 1H/1  
 PULPROG zgpg30  
 TD 65536  
 SOLVENT CDC13  
 NS 1563  
 DS 4  
 SWH 23980.814 Hz  
 FIDRES 0.365918 Hz  
 AQ 1.3664756 sec  
 RG 724.1  
 DW 20.850 usec  
 DE 6.00 usec  
 TE 299.2 K  
 D1 2.00000000 sec  
 d11 0.03000000 sec  
 DELTA 1.89999998 sec  
 MCREST 0.00000000 sec  
 MCWRK 0.01500000 sec

===== CHANNEL f1 =====  
 NUC1 13C  
 P1 10.00 usec  
 PL1 -3.00 dB  
 SFO1 100.6228298 MHz

===== CHANNEL f2 =====  
 CPDPRG2 waltz16  
 NUC2 1H  
 PCPD2 80.00 usec  
 PL2 0.00 dB  
 PL12 17.00 dB  
 PL13 17.00 dB  
 SFO2 400.1316005 MHz

F2 - Processing parameters  
 SI 32768  
 SF 100.6127690 MHz  
 WFI 0  
 SSB 0  
 LB 1.00 Hz  
 GB 0  
 FC 1.40

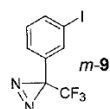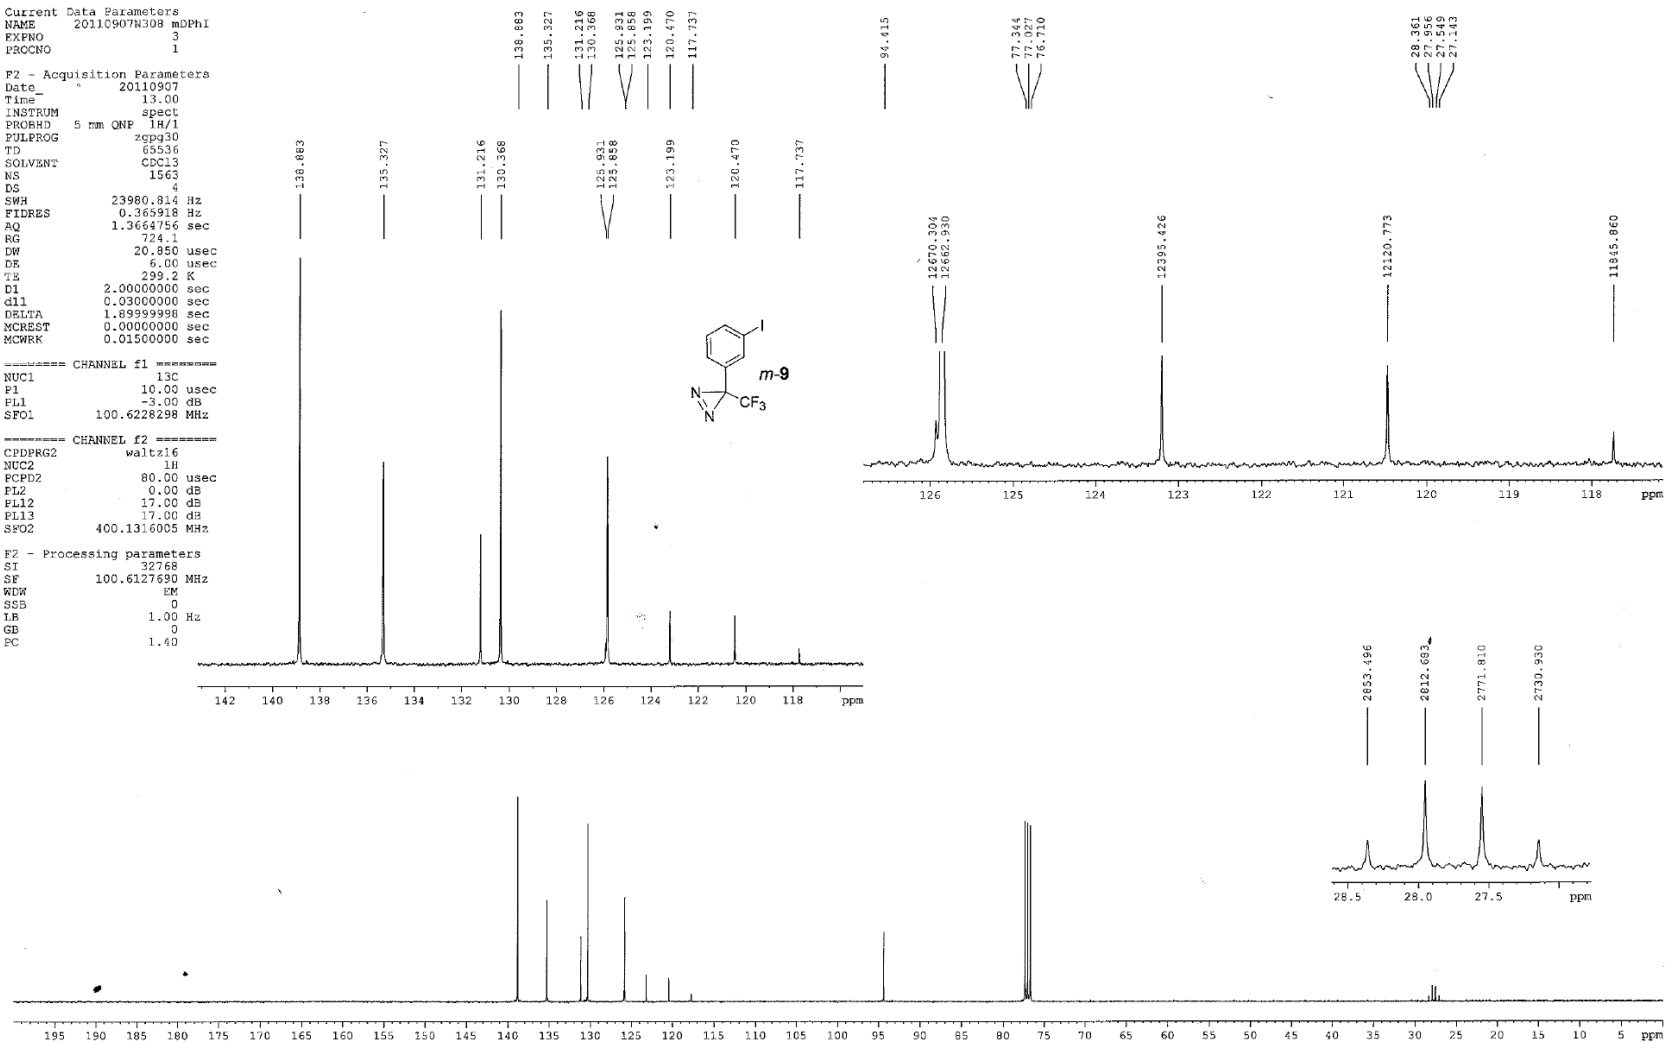

Current Data Parameters  
NAME 20110907N308 mDPHI  
EXPNO 2  
PROCNO 1

F2 - Acquisition Parameters  
Date\_ 20110907  
Time 11.25  
INSTRUM spect  
PROBHD 5 mm QNP 1H/1  
PULPROG zgpg30  
TD 300744  
SOLVENT C6D6  
NS 16  
DS 4  
SWH 75187.969 Hz  
FIDRES 0.250007 Hz  
AQ 1.9999976 sec  
RG 406.4  
DW 6.650 usec  
DE 6.00 usec  
TE 298.2 K  
D1 1.0000000 sec

----- CHANNEL f1 -----  
NUC1 19F  
P1 12.50 usec  
PL1 -6.00 dB  
SFO1 376.4607044 MHz

F2 - Processing parameters  
SI 65536  
SF 376.4983540 MHz  
WDW EM  
SSB 0  
LB 0.30 Hz  
GB 0  
EC 1.00

F19

-65.168

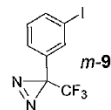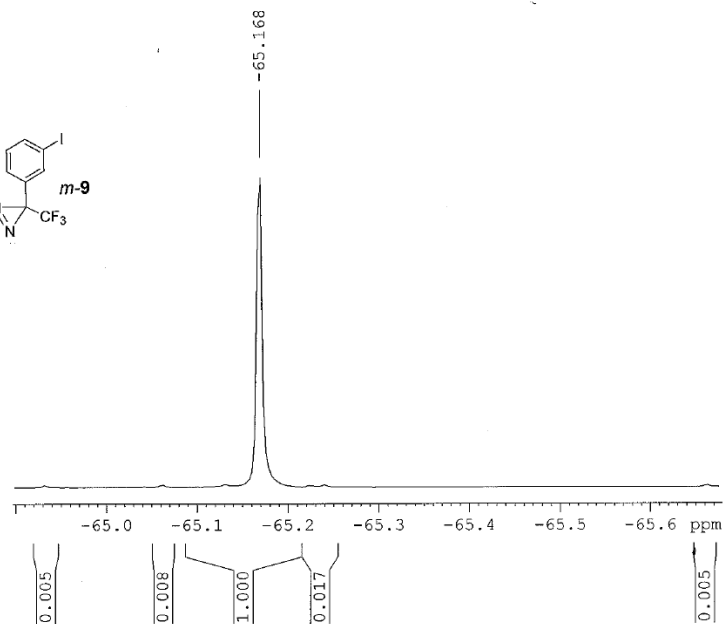

-10 -20 -30 -40 -50 -60 -70 -80 -90 -100 -110 -120 -130 -140 -150 -160 -170 -180 -190 ppm

0.005  
0.008  
1.000  
0.017  
0.005

```

Current Data Parameters
NAME 201101250214 p1phCMZCF3
EXPNO 1
PROCNO 1

F2 - Acquisition Parameters
Date_ 20110125
Time 10.31
INSTRUM spect
PROBHD 5 mm PABBO S2-
PULPROG zg30
TD 65536
SOLVENT CDCl3
NS 8
DS 2
SWH 8278.146 Hz
FIDRES 0.126314 Hz
AQ 3.9584243 sec
RG 32
DN 60.400 usec
DE 6.00 usec
TE 297.5 K
D1 1.00000000 sec
MCREST 0.00000000 sec
MCNKK 0.01500000 sec

***** CHANNEL f1 *****
NUC1 1H
P1 12.25 usec
PL1 -2.00 dB
SFO1 400.1724712 MHz

F2 - Processing parameters
SI 32768
SP 400.1700000 MHz
WDW EM
SSB 0
LB 0.30 Hz
GB 0
PC 1.00
    
```

7.775  
7.769  
7.764  
7.753  
7.747  
7.742  
7.280  
6.957  
6.955  
6.935  
6.934

3111.396  
3107.072  
3102.347  
3100.331  
3098.016

2913.263

2783.917  
2783.369  
2775.303  
2774.685

1.559  
0.909

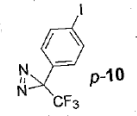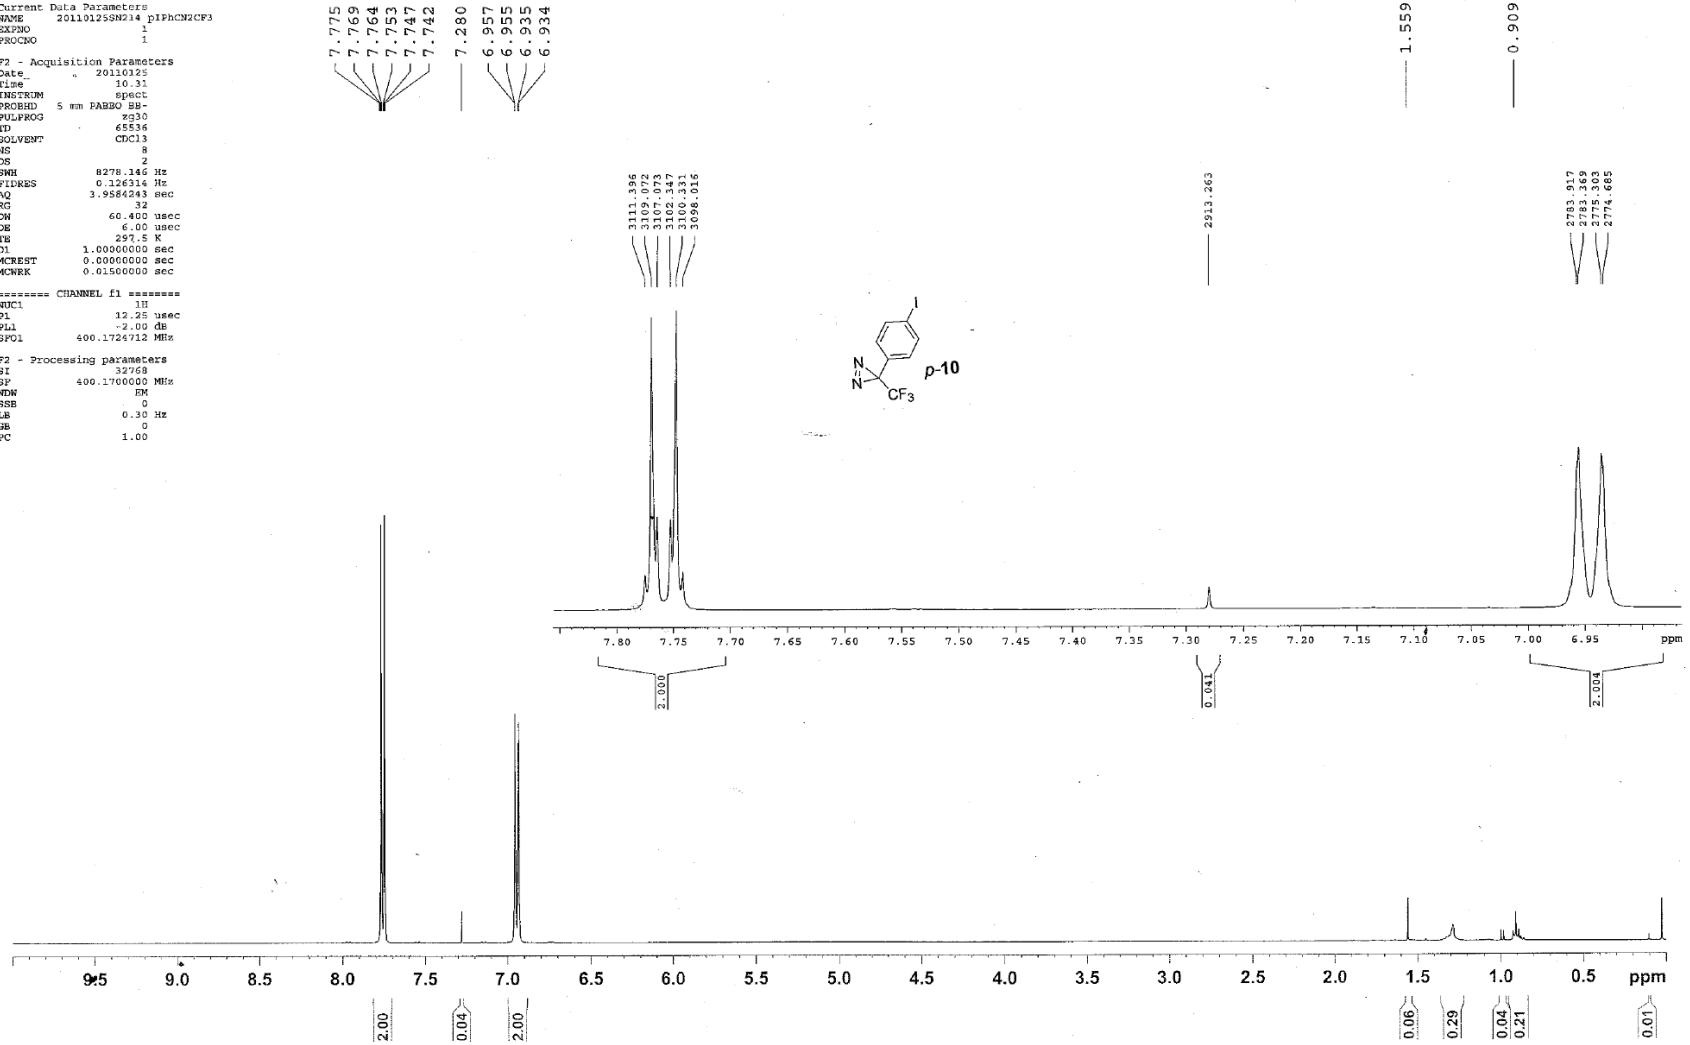

Current Data Parameters  
 NAME 20110125SN214\_p1PhCN2CF3  
 EXPNO 2  
 FREQC0 1

F2 - Acquisition Parameters  
 Date 20110125  
 Time 12.28  
 INSTRUM spect  
 PULPROG 5 mm PABBO H1-  
 PULPROG zpg30  
 TD 65536  
 SOLVENT CCl3  
 NS 1934

DS 4  
 SWH 23960.814 Hz  
 FIDRES 0.365918 Hz  
 AQ 1.3660786 sec  
 RG 1290.2  
 EW 20.850 usec  
 DS 6.00 usec  
 TE 297.9 K  
 DL 2.0000000 sec  
 d11 0.0300000 sec  
 DELTA 1.89999998 sec  
 MCREST 0.0000000 sec  
 MCMRK 0.0250000 sec

----- CHANNEL f1 -----  
 NUC1 13C  
 P1 9.50 usec  
 PL1 -2.00 dB  
 SF01 100.6228888 MHz

----- CHANNEL f2 -----  
 CPDPRG2 waltz16  
 NUC2 1H  
 PCPD2 80.00 usec  
 PL2 -2.00 dB  
 PL12 14.30 dB  
 PL13 14.00 dB  
 SFO2 400.1716007 MHz

F2 - Processing parameters  
 SI 32768  
 SF 100.6228270 MHz  
 WDW EM  
 SSB 0  
 LB 1.00 Hz  
 GB 0  
 PC 1.40

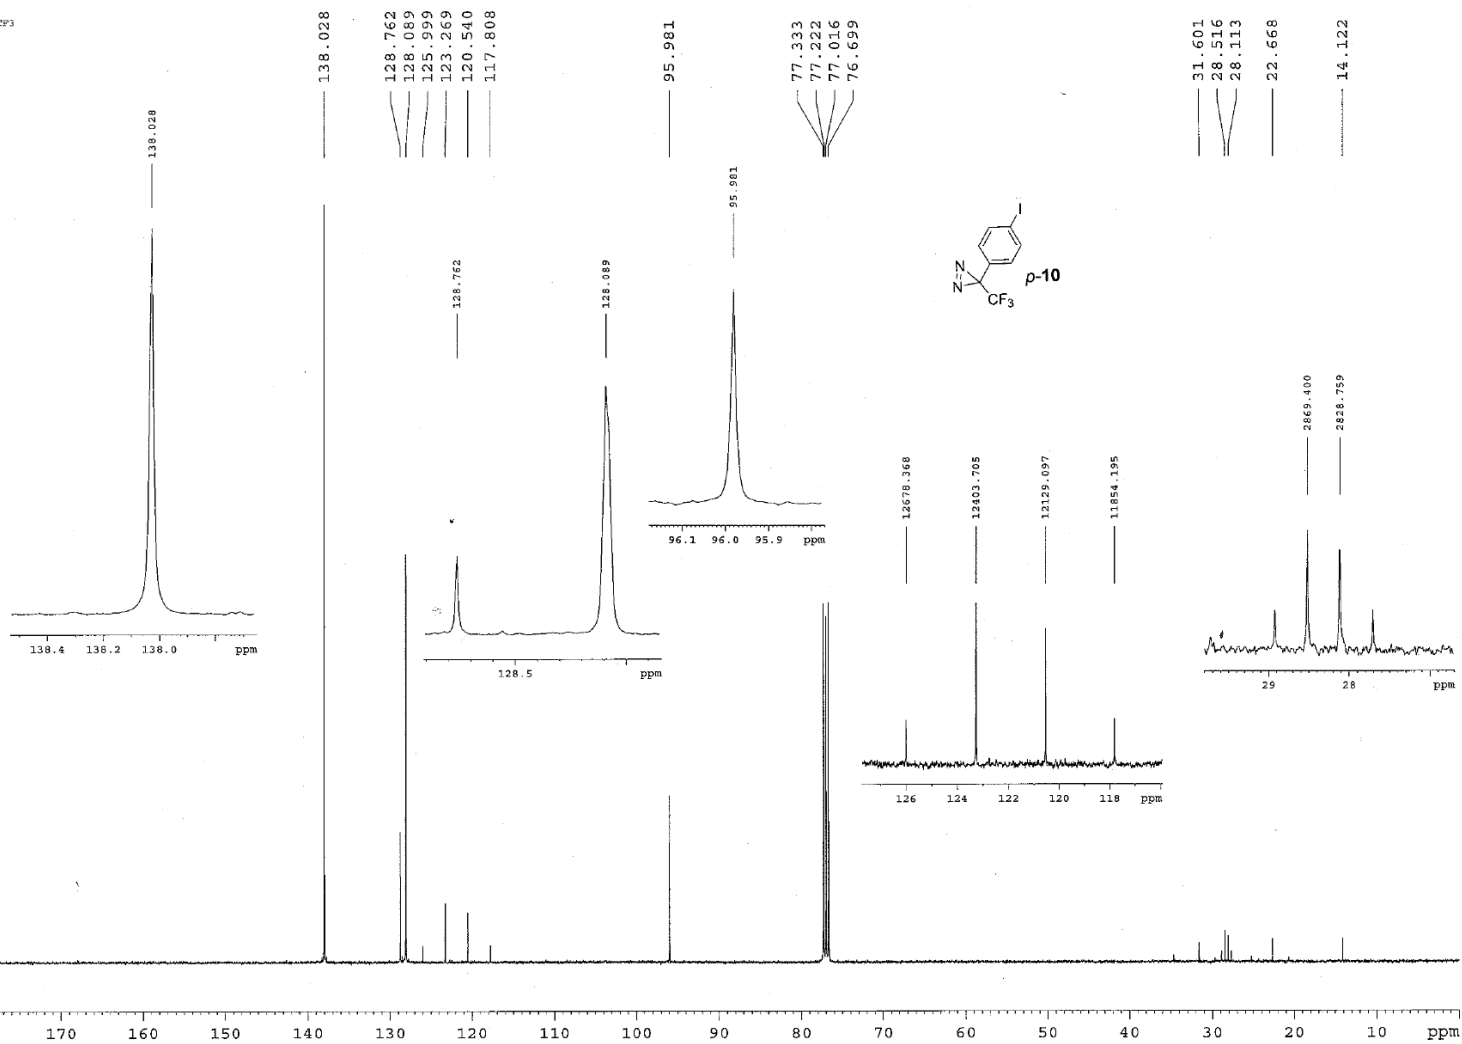

```

Current Data Parameters
NAME      2011012402196169 p1PNCN2CF3
EXPNO    2
PROCNO   1

F2 - Acquisition Parameters
Date_    20110124
Time     18.00
INSTRUM  spect
PROBHD   5 mm QNP 1H/1
PULPROG  zgpg30
TD       311522
SOLVENT  CDCl3
NS       16
DS       4
SWH      75187.369 Hz
FIDRES   0.241357 Hz
AQ       2.0714713 sec
RG       512
DM       6.850 usec
DE       6.00 usec
TE       298.2 K
D1       1.00000000 sec

===== CHANNEL f1 =====
NUC1     19F
P1       12.50 usec
PL1     -6.00 dB
FREQ    376.4607044 MHz

F2 - Processing parameters
SI       62536
SF       376.4983540 MHz
WDW      EM
SSB      0
LB       0.30 Hz
GB       0
CB       1.00

```

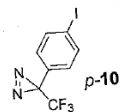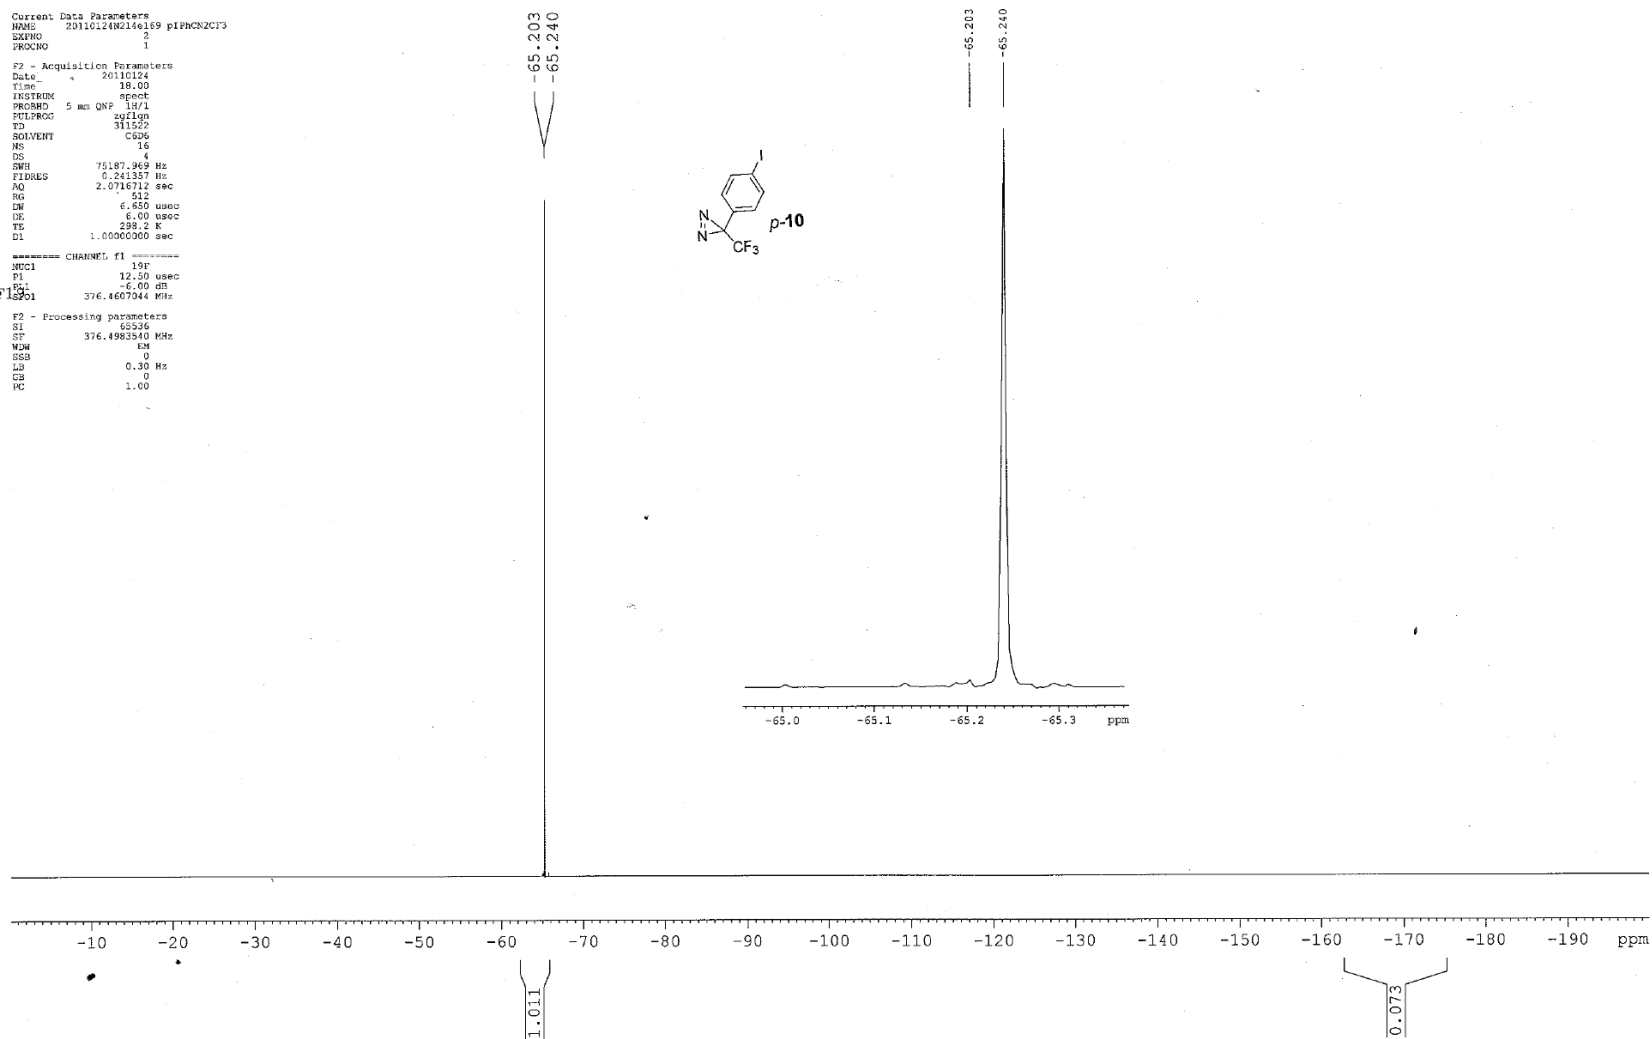



Current Data Parameters  
 NAME 20110617SN2829 mDiazI+pMeO  
 EXPNO 1  
 PROCNO 1

## F2 - Acquisition Parameters

Date\_ 20110617  
 Time 12.58  
 INSTRUM spect  
 PROBRD 5 mm FAPRO sb-  
 PULPROG zg30  
 TD 65536  
 SOLVENT CDCl3  
 NS 16  
 DS 2  
 SSB 8278.146 Hz  
 FIDRES 0.126314 Hz  
 AQ 3.9584243 sec  
 RG 90.5  
 DW 60.400 usec  
 DE 6.00 usec  
 TE 297.3 K  
 D1 1.00000000 sec  
 MCREST 0.00000000 sec  
 MCWAK 0.01500000 sec

----- CHANNEL f1 -----  
 NUC1 1H  
 P1 12.25 usec  
 PL1 -2.00 dB  
 SFO1 400.1724712 MHz

F2 - Processing parameters  
 SI 32768  
 SF 400.1700000 MHz  
 WDW EM  
 SSB 0  
 LB 0.30 Hz  
 GB 0  
 C 1.00

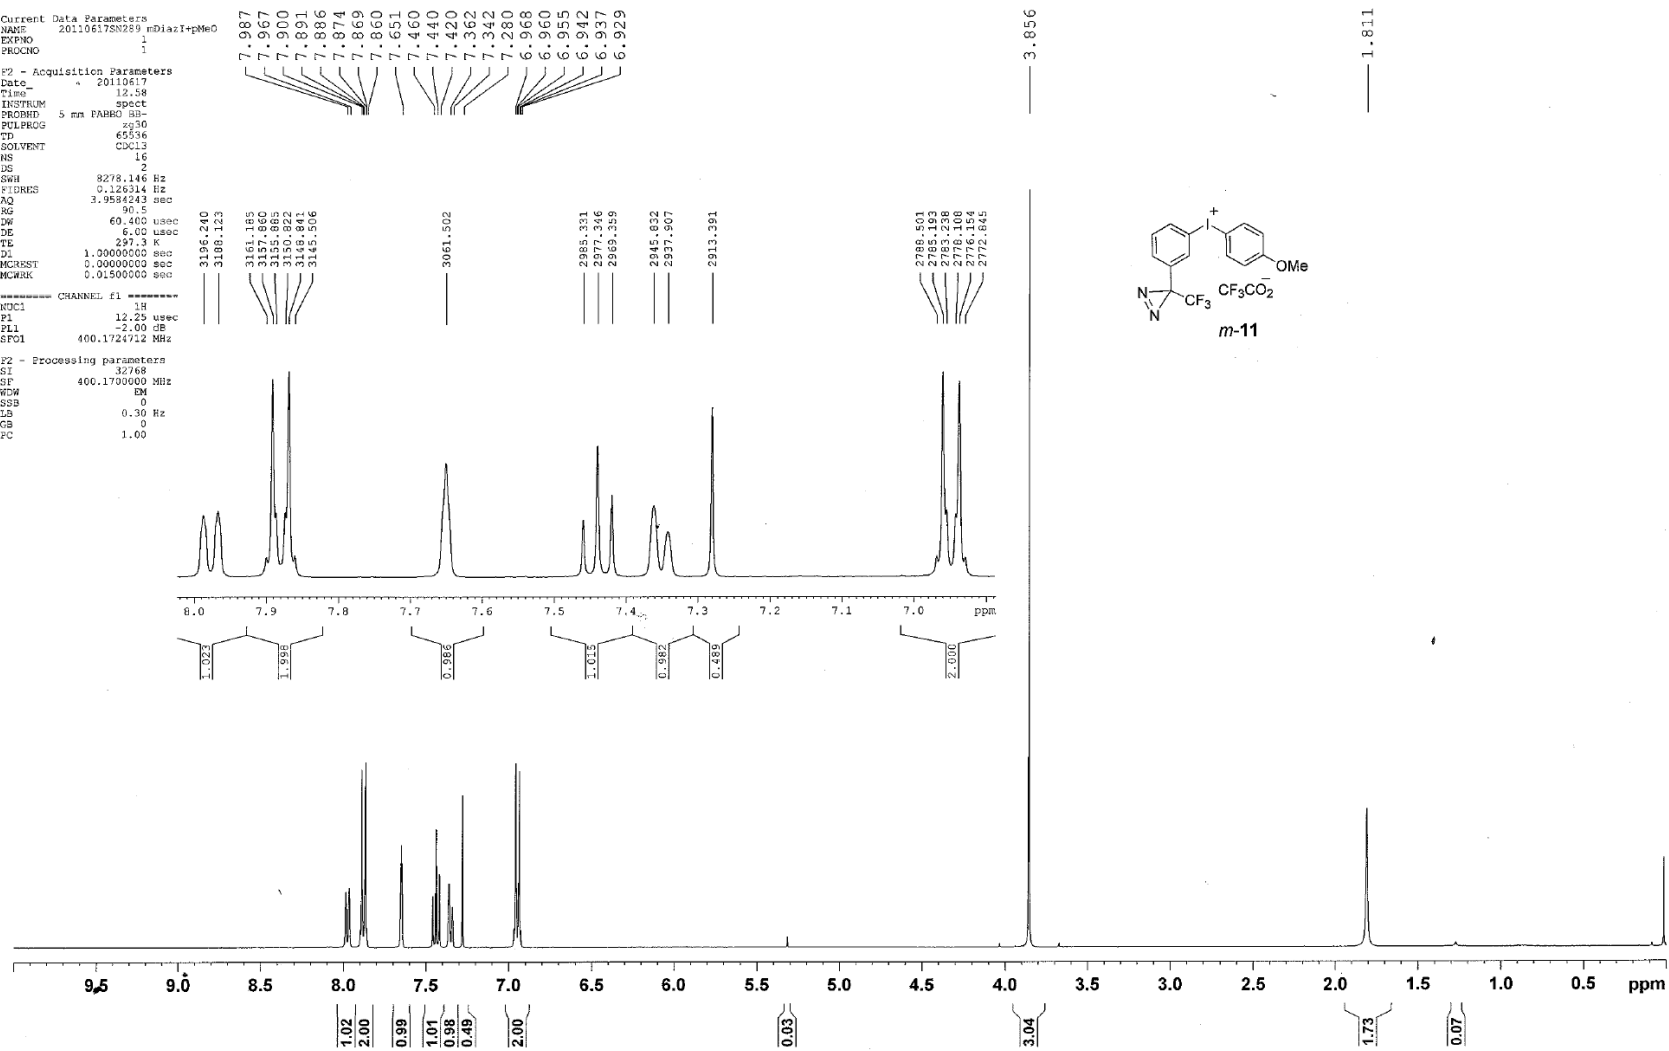

Current Data Parameters  
 NAME 201103170242e194mbiaz1+pMeO maj  
 EXPNO 3  
 PROCNO 1

## F2 - Acquisition Parameters

Date 20110317  
 Time 12.54  
 INSTRUM spect  
 PROBHD 5 mm QNP 1H/1  
 PULPROG zgpg30  
 ID 65536  
 SOLVENT CDCl3  
 NS 362  
 DS 4  
 SWH 23980.814 Hz  
 FIDRES 0.365918 Hz  
 AQ 1.3664756 sec  
 RG 2048  
 DW 20.850 usec  
 DE 6.00 usec  
 TE 298.2 K  
 D1 2.00000000 sec  
 d11 0.03000000 sec  
 DELTA 1.89999998 sec  
 MCREST 0.00000000 sec  
 MCWRK 0.01500000 sec

## CHANNEL f1

NUC1 13C  
 P1 10.00 usec  
 PL1 -3.00 dB  
 SFO1 100.6228298 MHz

## CHANNEL f2

CPDPRG2 waltz16  
 NUC2 1H  
 PCPD2 80.00 usec  
 PL2 0.00 dB  
 PL12 17.00 dB  
 PL13 17.00 dB  
 SFO2 400.1316005 MHz

## F2 - Processing parameters

SI 32768  
 SF 100.6127690 MHz  
 WMW 0  
 SSB 0  
 LB 1.00 Hz  
 GB 0  
 PC 1.40

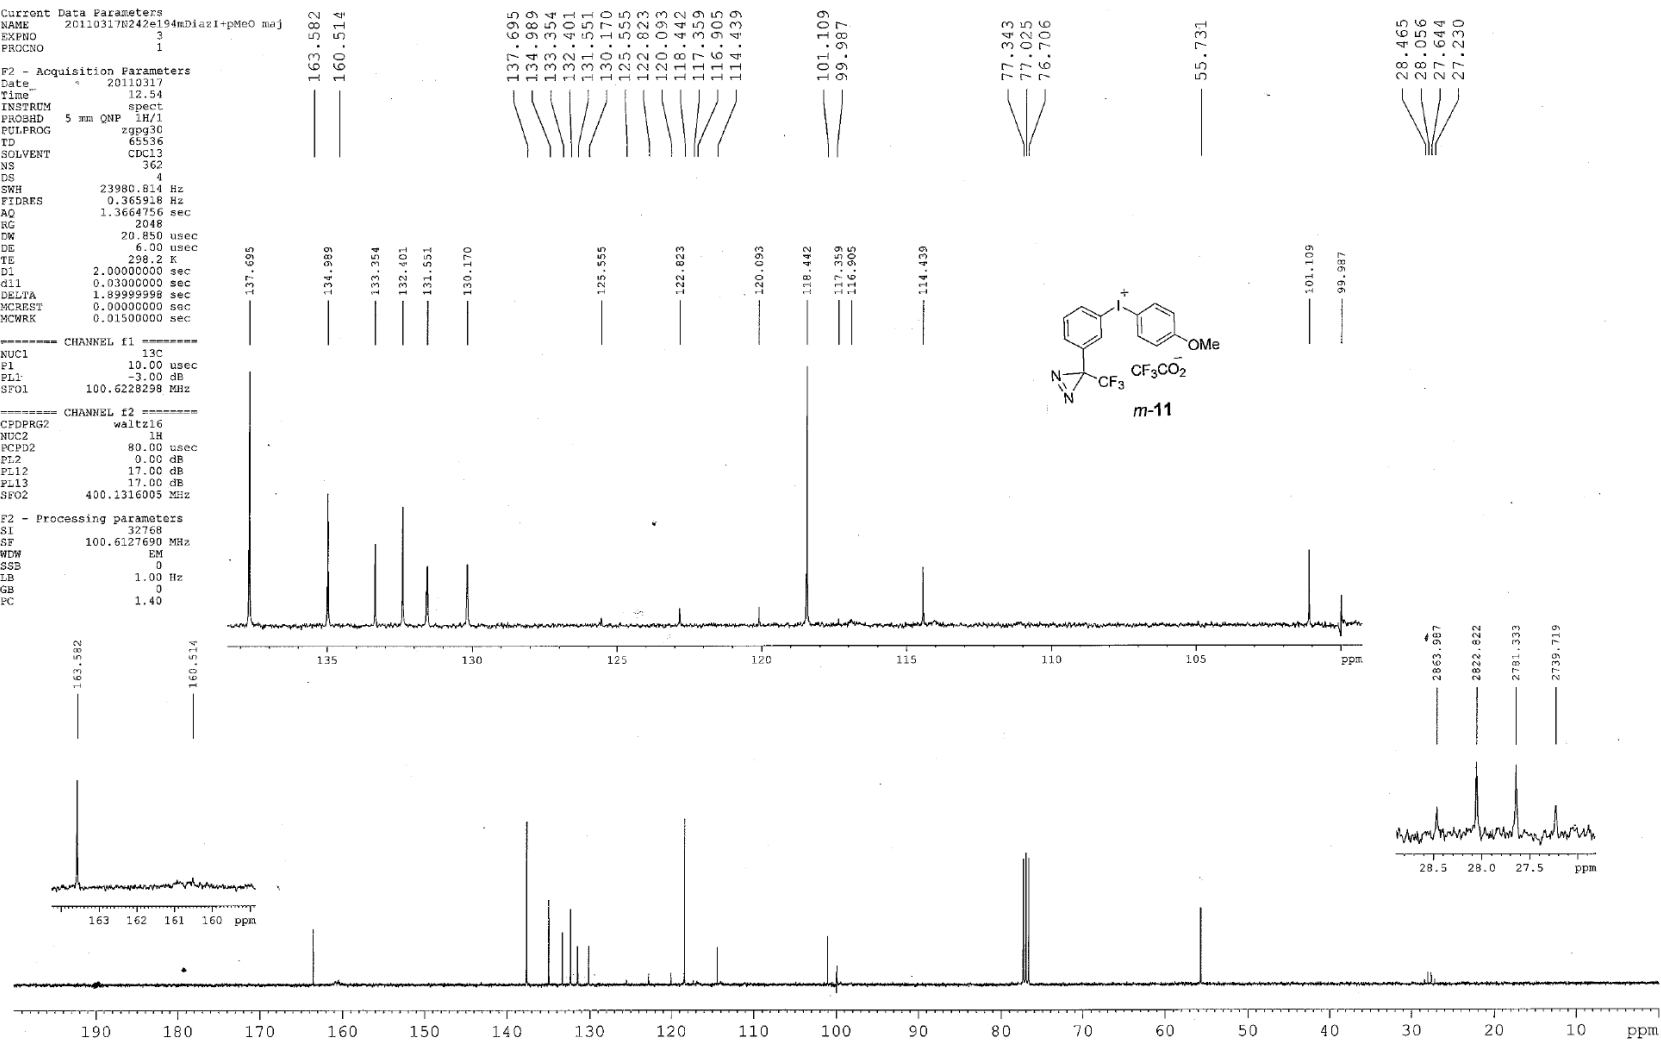

F19

Current Data Parameters  
 NAME 20110317N242e19mDiazI+pMeO maj  
 EXPNO 2  
 PROCNO 1

F2 - Acquisition Parameters  
 Date\_ 20110317  
 Time 12.29  
 INSTRUM spect  
 PROBRD 5 mm QNP 1H/1  
 PULPROG zgpg30  
 TD 451120  
 SOLVENT CDCl3  
 NS 16  
 DS 4  
 SWH 75187.969 Hz  
 FIDRES 0.166570 Hz  
 AQ 2.9999981 sec  
 RG 362  
 DW 6.650 usec  
 DE 6.00 usec  
 TE 298.2 K  
 D1 1.0000000 sec

----- CHANNEL f1 -----  
 NUC1 19F  
 P1 12.50 usec  
 PL1 -6.00 dB  
 SFO1 376.4607044 MHz

F2 - Processing parameters  
 SI 65536  
 SF 376.4983540 MHz  
 RDW EM  
 SSB 0  
 LB 0.30 Hz  
 GB 0  
 PC 1.00

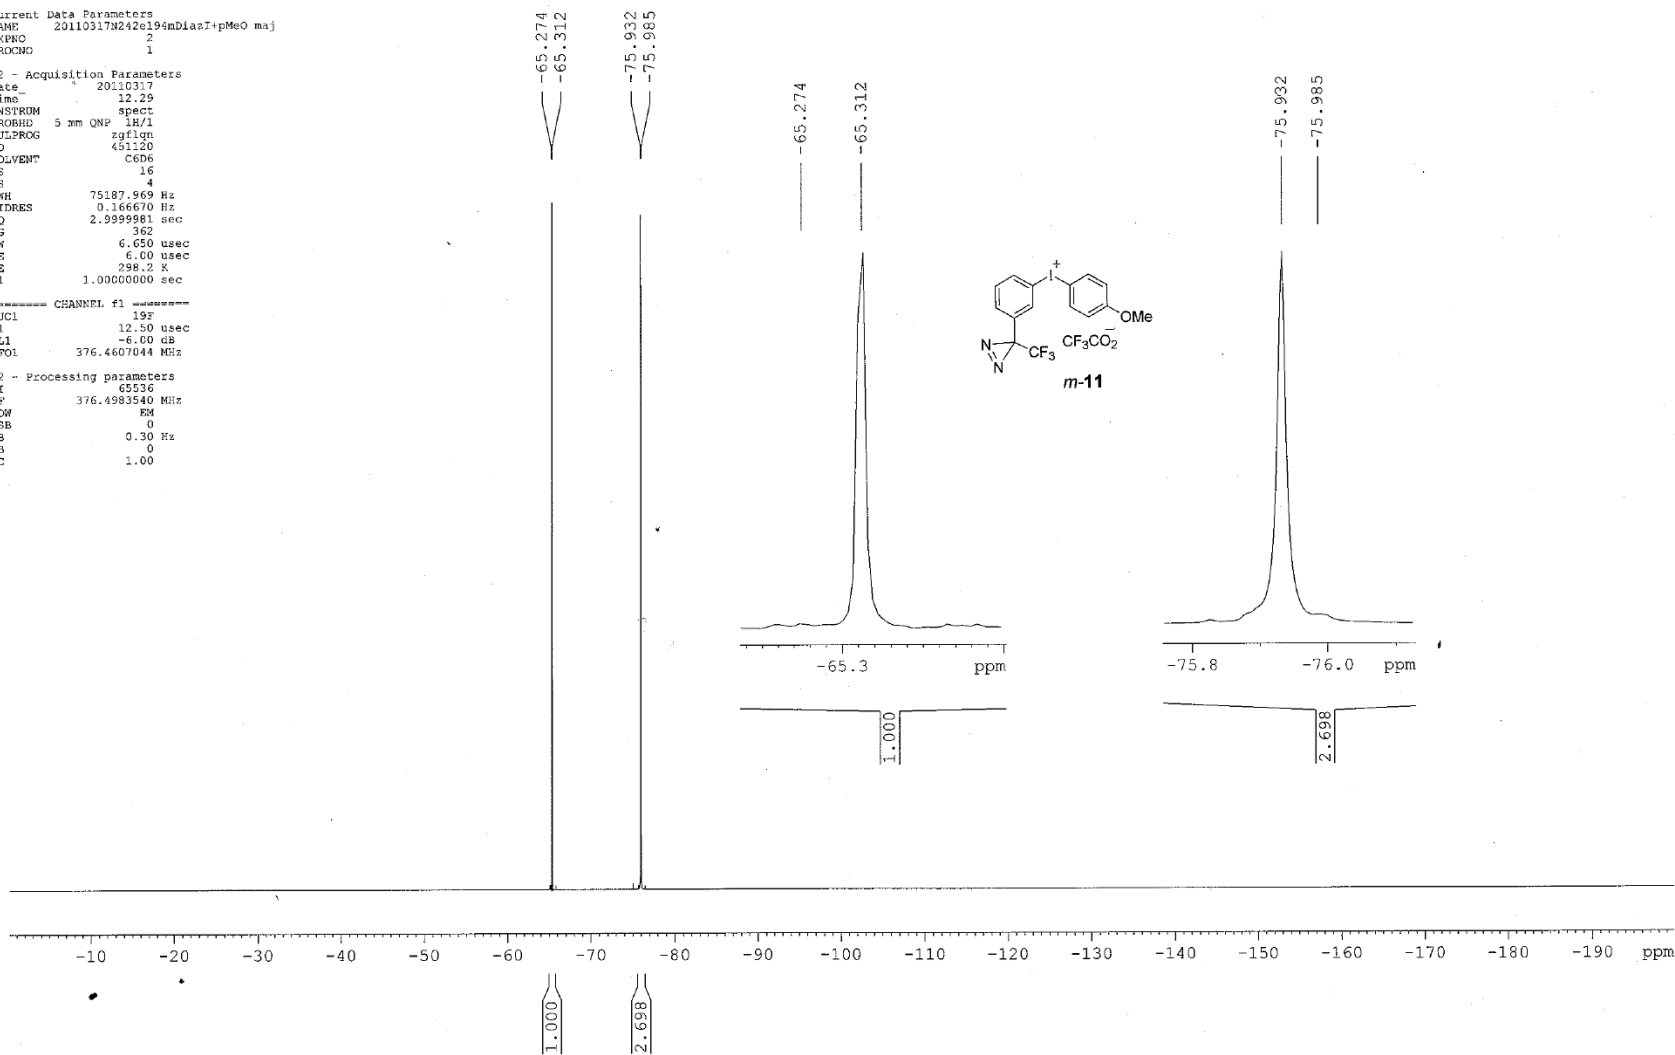

Current Data Parameters  
 NAME 20100506N276e213 p01a21-pMeC  
 EXPNO 1  
 PROCNO 1

F2 - Acquisition Parameters  
 Date\_ 20110505  
 Time 15:27  
 INSTRUM spect  
 FREQHD 5 cm QNP 1H/1  
 PULPROG zgpg30  
 TD 65536  
 SOLVENT CDCl3  
 NS 16  
 DS 2  
 SWH 8278.146 Hz  
 FIDRES 0.126314 Hz  
 AQ 3.9584243 sec  
 RG 352  
 LW 60.400 usec  
 DE 6.00 usec  
 VE 299.2 K  
 DI 1.00000000 sec  
 MCREST 0.00000000 sec  
 MCHRG 0.01500000 sec

===== CHANNEL f1 =====  
 NUC1 13C  
 P1 12.00 usec  
 PL1 0.00 dB  
 SFO1 400.1324710 MHz  
 F2 - Processing parameters  
 SI 32768  
 SF 400.1300000 MHz  
 WDW EM  
 SSB 0  
 LB 0.30 Hz  
 GB 6  
 RC 1.00

7.962  
7.956  
7.952  
7.939  
7.934  
7.928  
7.882  
7.877  
7.864  
7.859  
7.851  
7.284  
7.181  
7.160  
6.924  
6.919  
6.906  
6.901

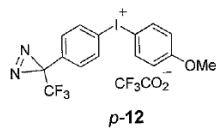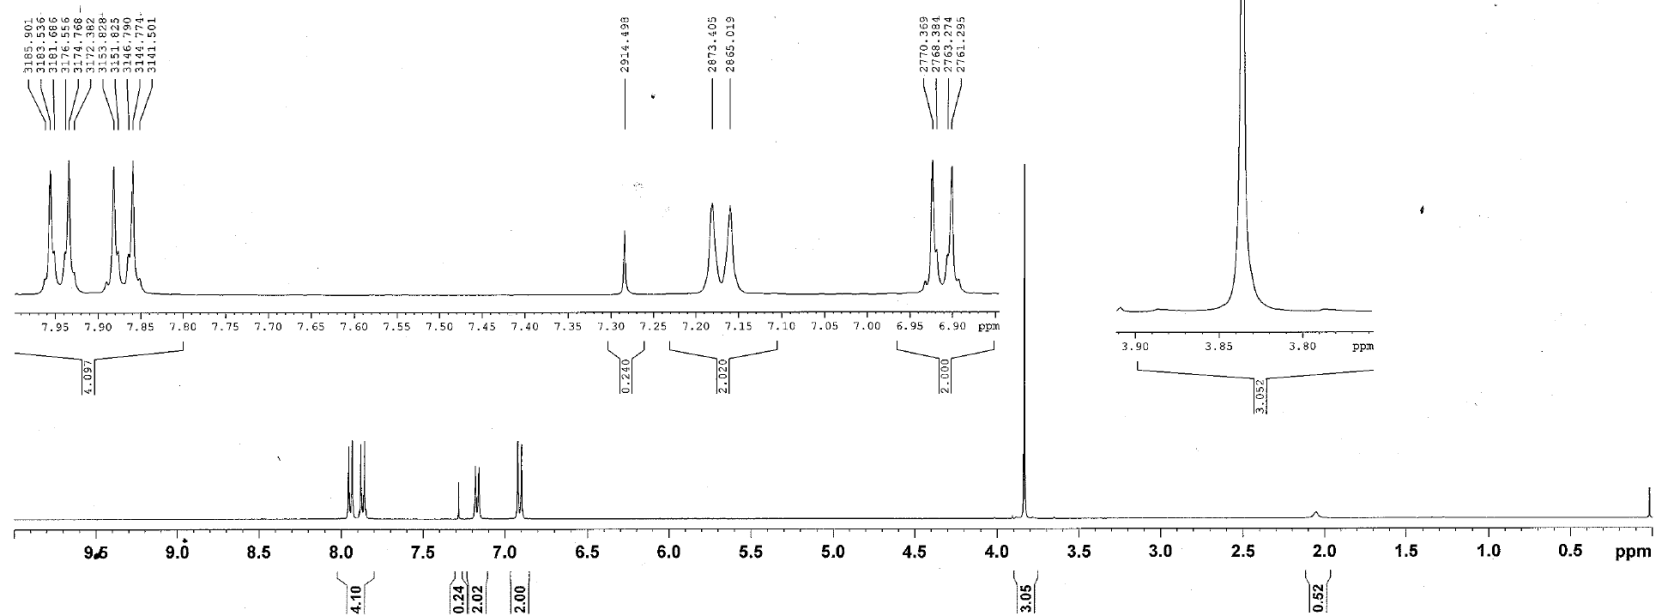

Current Data Parameters  
 NAME 20110506N276213 p01asi-pms0  
 EXPRD 1  
 PROCNO 1

F2 - Acquisition Parameters  
 Date\_ 20110517  
 Time\_ 19:21  
 INSTRUM spect  
 PULPROG zgpg30  
 TD 65536  
 SOLVENT CDCl3  
 NS 16233  
 DS 4  
 SWH 23986.814 Hz  
 FIDRSS 0.365918 Hz  
 RG 1.5664756 sec  
 SG 1149.4  
 DW 20.850 usec  
 DE 6.40 usec  
 TE 295.2 K  
 D1 2.30000000 sec  
 d11 0.03000000 sec  
 DELTA 1.87999998 sec  
 MEAS1 0.00000000 sec  
 MEAS2 0.01500000 sec

===== CHANNEL f1 =====  
 NUC1 13C  
 P1 10.00 usec  
 PL1 -3.00 dB  
 SFO1 100.6228298 MHz

===== CHANNEL f2 =====  
 CPDPRG2 waltz16  
 NUC2 1H  
 P2 80.00 usec  
 PL2 0.00 dB  
 PL12 17.00 dB  
 PL13 0.00 dB  
 SFO2 400.1316102 MHz

F2 - Processing parameters  
 SI 32768  
 SF 100.6127690 MHz  
 WU 24  
 SSB 0  
 LB 1.00 Hz  
 GB 0  
 PC 1.40

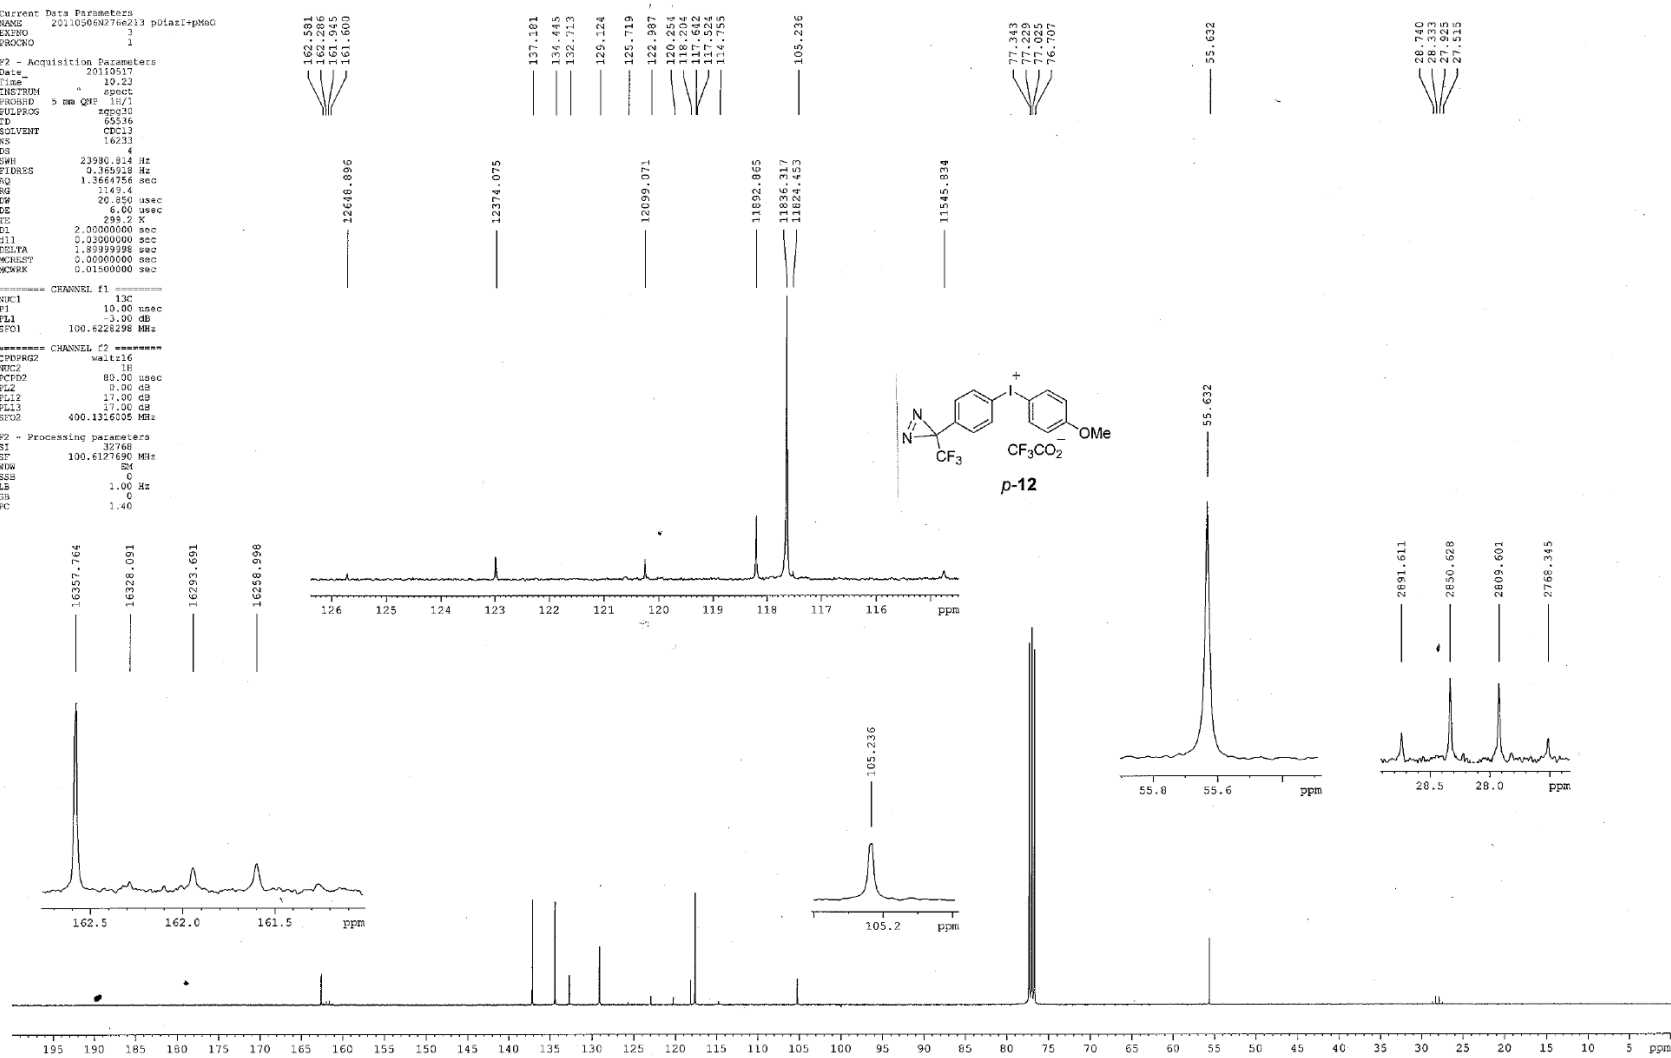

Current Data Parameters  
 NAME 20110506276e213 pDiazI-pMeO  
 EXPNO 4  
 PROCNO 1

F2 - Acquisition Parameters  
 Date\_ 20110517  
 Time 10.40  
 INSTRUM spect  
 PROBRD 5 mm QNP 1H/1  
 PULPROG zgpg30  
 TD 300744  
 SOLVENT C6D6  
 NS 64  
 DS 4  
 SWH 75187.869 Hz  
 FIDRES 0.250007 Hz  
 AQ 1.9999976 sec  
 RG 812.7  
 DW 6.650 usec  
 DE 6.00 usec  
 TE 299.2 K  
 D1 1.0000000 sec

===== CHANNEL f1 =====  
 NUC1 19F  
 P1 12.50 usec  
 PL1 -6.00 dB  
 SFO1 376.4607044 MHz  
 F2 - Processing parameters  
 SI 65536  
 SF 376.4903540 MHz  
 WDW EM  
 SSB 0  
 LB 0.30 Hz  
 GB 0  
 PC 1.00

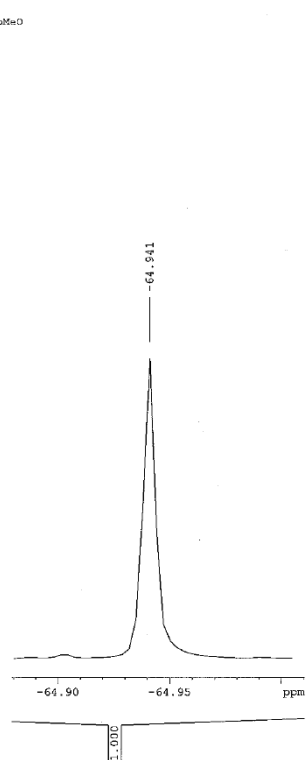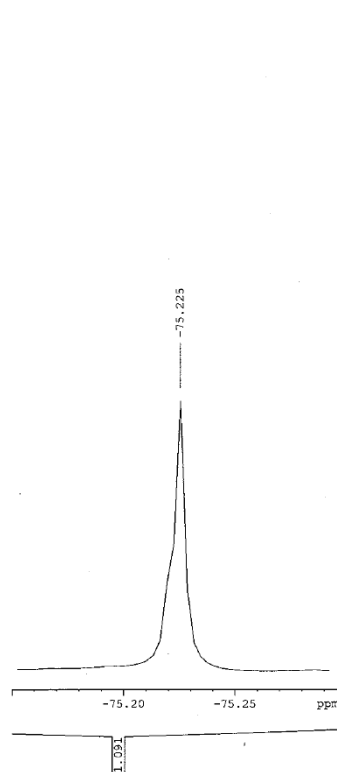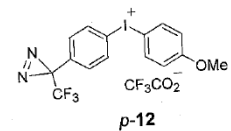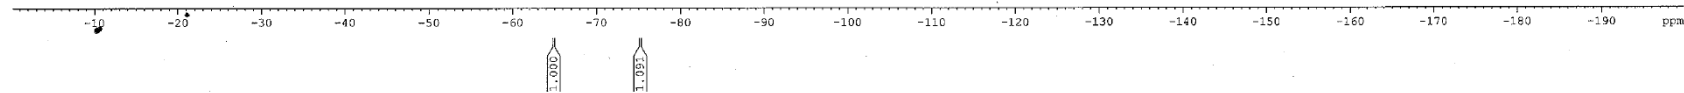

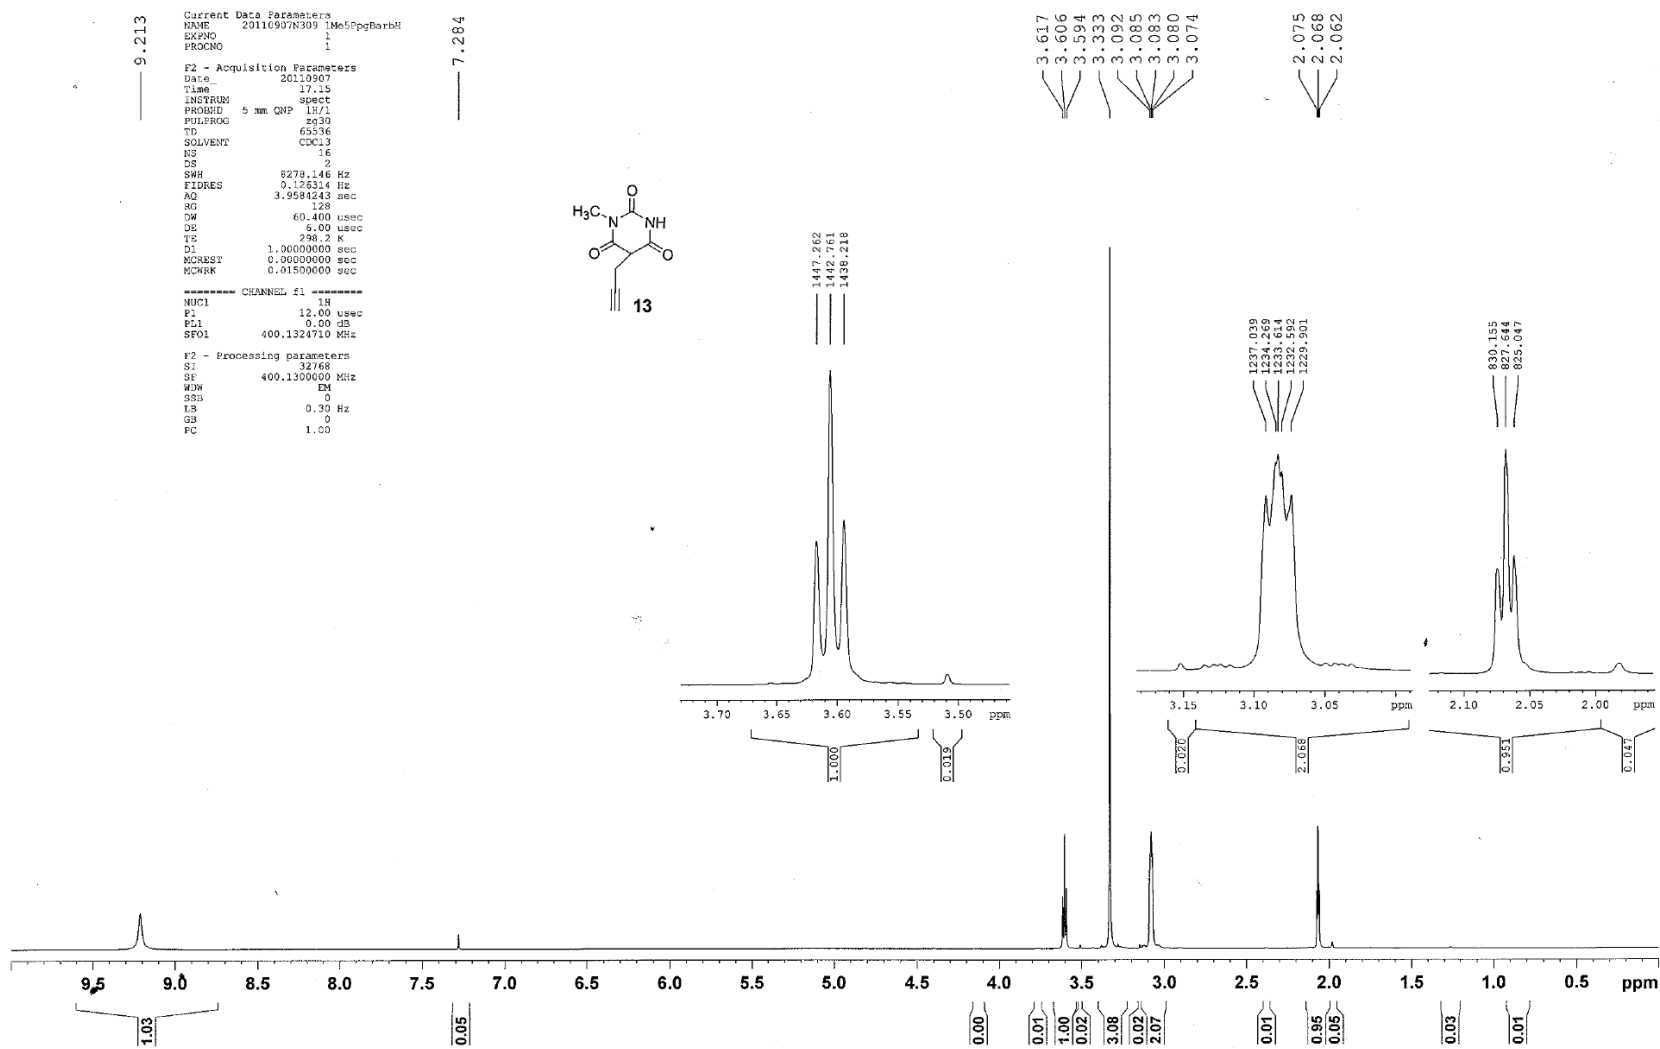

Current Data Parameters  
 NAME 20110907N309 1Me5PpgbarbH  
 EXPNO 2  
 PROCNO 1

F2 - Acquisition Parameters  
 Date\_ 20110907  
 Time\_ 17.31  
 INSTRUM spect  
 PROBHD 5 mm QNP 1H/1  
 PULPROG zgpg30  
 TD 65536  
 SOLVENT CDCl3  
 NS 513  
 DS 4  
 SWH 23980.614 Hz  
 FIDRES 0.355916 Hz  
 AQ 1.3664756 sec  
 RG 724.1  
 DW 20.850 usec  
 DE 6.00 usec  
 TE 299.2 K  
 D1 2.0000000 sec  
 d11 0.0300000 sec  
 DELTA 1.8999998 sec  
 MCHYST 0.0000000 sec  
 MCHRK 0.0150000 sec

----- CHANNEL f1 -----  
 NUC1 13C  
 P1 10.00 usec  
 PL1 -3.00 dB  
 SFO1 100.6228298 MHz

----- CHANNEL f2 -----  
 CDDEG2 waltz16  
 NUC2 1H  
 DCEG2 80.00 usec  
 PL2 0.00 dB  
 PL12 17.00 dB  
 PL13 17.00 dB  
 SFO2 400.1316000 MHz

F2 - Processing parameters  
 SI 32768  
 SP 100.6127690 MHz  
 WDW DM  
 SSB 0  
 LB 1.00 Hz  
 GB 0  
 PC 1.40

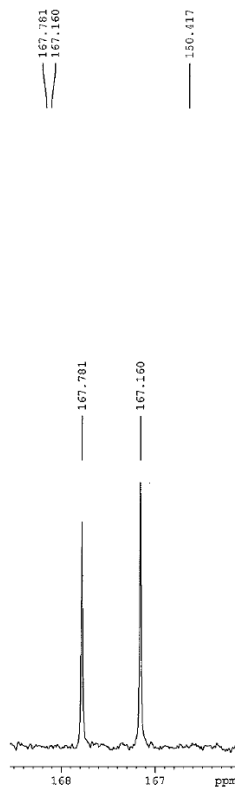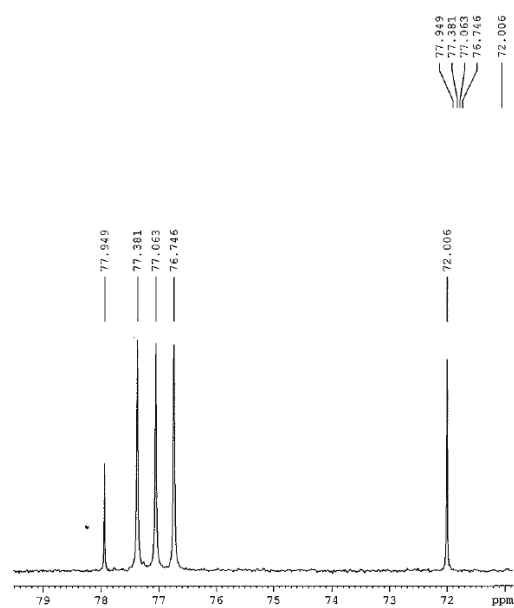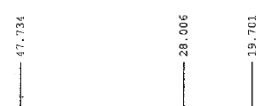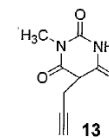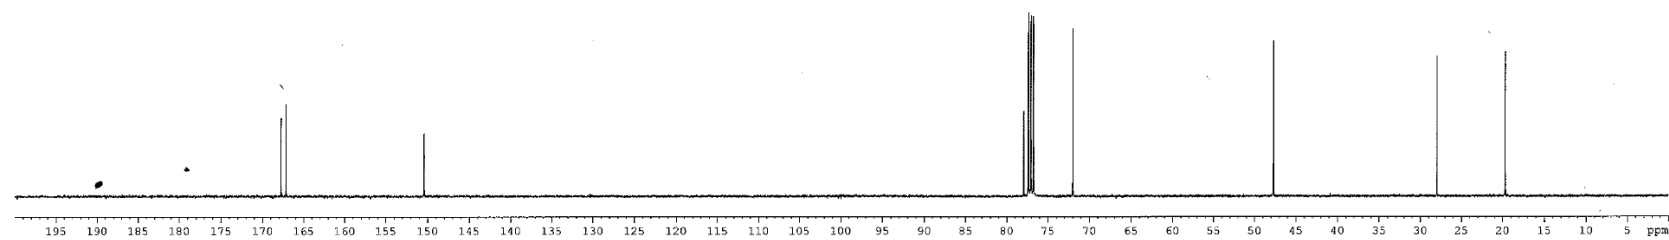



Current Data Parameters  
 NAME: 211200700007.HMBarball rec per  
 EXPNO: 1  
 PROCNO: 1

F2 - Acquisition Parameters  
 Date\_: 20120207  
 Time: 14.12  
 INSTRUM: spect  
 PULPROG: zgpg30  
 FIDRES: 5 mm QNP  
 ID: 65534  
 SOLVENT: CDCl3  
 NS: 16  
 DS: 4  
 SFO: 8278.146 Hz  
 FIDRES: 0.126314 Hz  
 AQ: 3.534915 sec  
 RG: 315  
 EN: 60.420 usec  
 DE: 6.20 usec  
 TE: 299.2 K  
 DL: 1.0000000 sec  
 MEKREF: 0.0000000 sec  
 MARRS: 0.0150000 sec

CHANNEL F1  
 NU1: 1H  
 P1: 12.00 usec  
 PL1: 0.00 dB  
 SFO1: 400.124710 MHz

F2 - Processing parameters  
 SI: 32768  
 SF: 400.1300000 MHz  
 NQ: 1H  
 SSB: 0  
 LB: 0.30 Hz  
 GB: 0  
 PC: 1.00

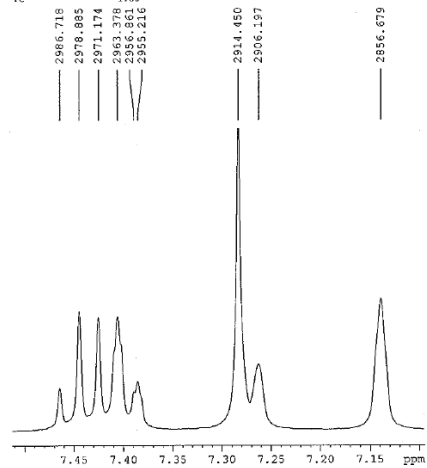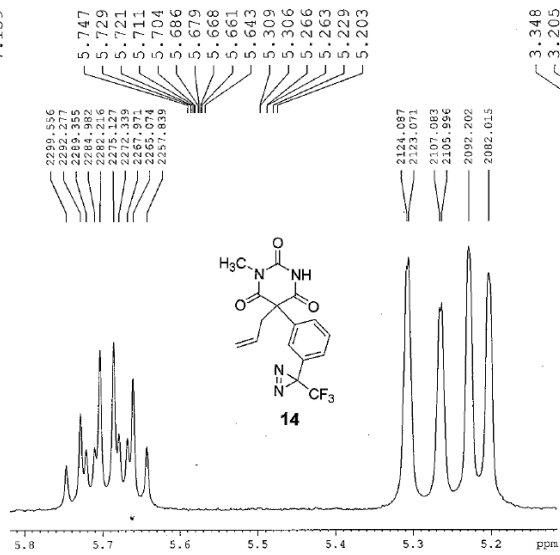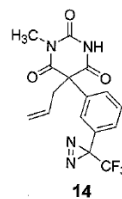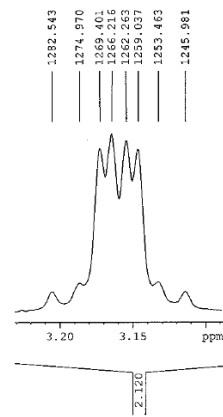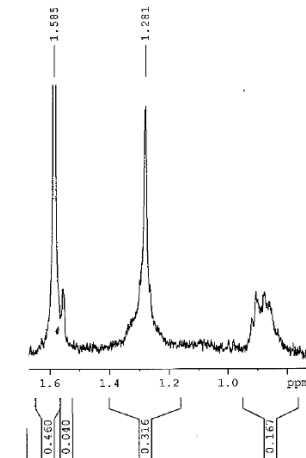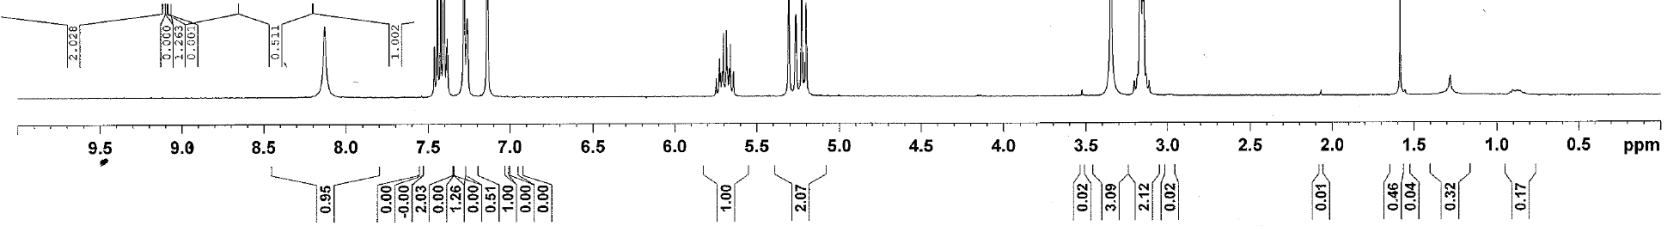

Current Data Parameters  
 NAME F0110329M1508aruDiaz repur  
 EXPNO 1  
 PROCNO 1

F2 - Acquisition Parameters  
 Date\_ 20110330  
 Time\_ 7.33  
 INSTRUM spect  
 PROBM 5 MHz QNP 1H/1  
 PULPROG zgpg30  
 TD 239804  
 SOLVENR CDCl3  
 NS 6144  
 DS 4  
 SWH 23980.814 Hz  
 FIDRES 0.100002 Hz  
 AQ 4.9989633 sec  
 RG 812.7  
 BW 20.850 usec  
 DE 6.00 usec  
 TE 298.2 K  
 D1 2.0000000 sec  
 d11 0.0300000 sec  
 DELTA 1.8989998 sec  
 MCREST 0.5000000 sec  
 KWARK 0.0150000 sec

----- CHANNEL f1 -----  
 NUC1 13C  
 P1 10.00 usec  
 PL1 -3.00 dB  
 SFO1 100.6228298 MHz  
 ----- CHANNEL f2 -----  
 CDPRG2 waltz16  
 NUC2 1H  
 PCPD2 80.00 usec  
 PL2 0.00 dB  
 PL12 17.00 dB  
 PL13 17.00 dB  
 SFO2 400.1316005 MHz

F2 - Processing parameters  
 SI 32768  
 SF 100.6127690 MHz  
 WDW no  
 SSB 0  
 LB 0.00 Hz  
 GB 0  
 PC 1.40

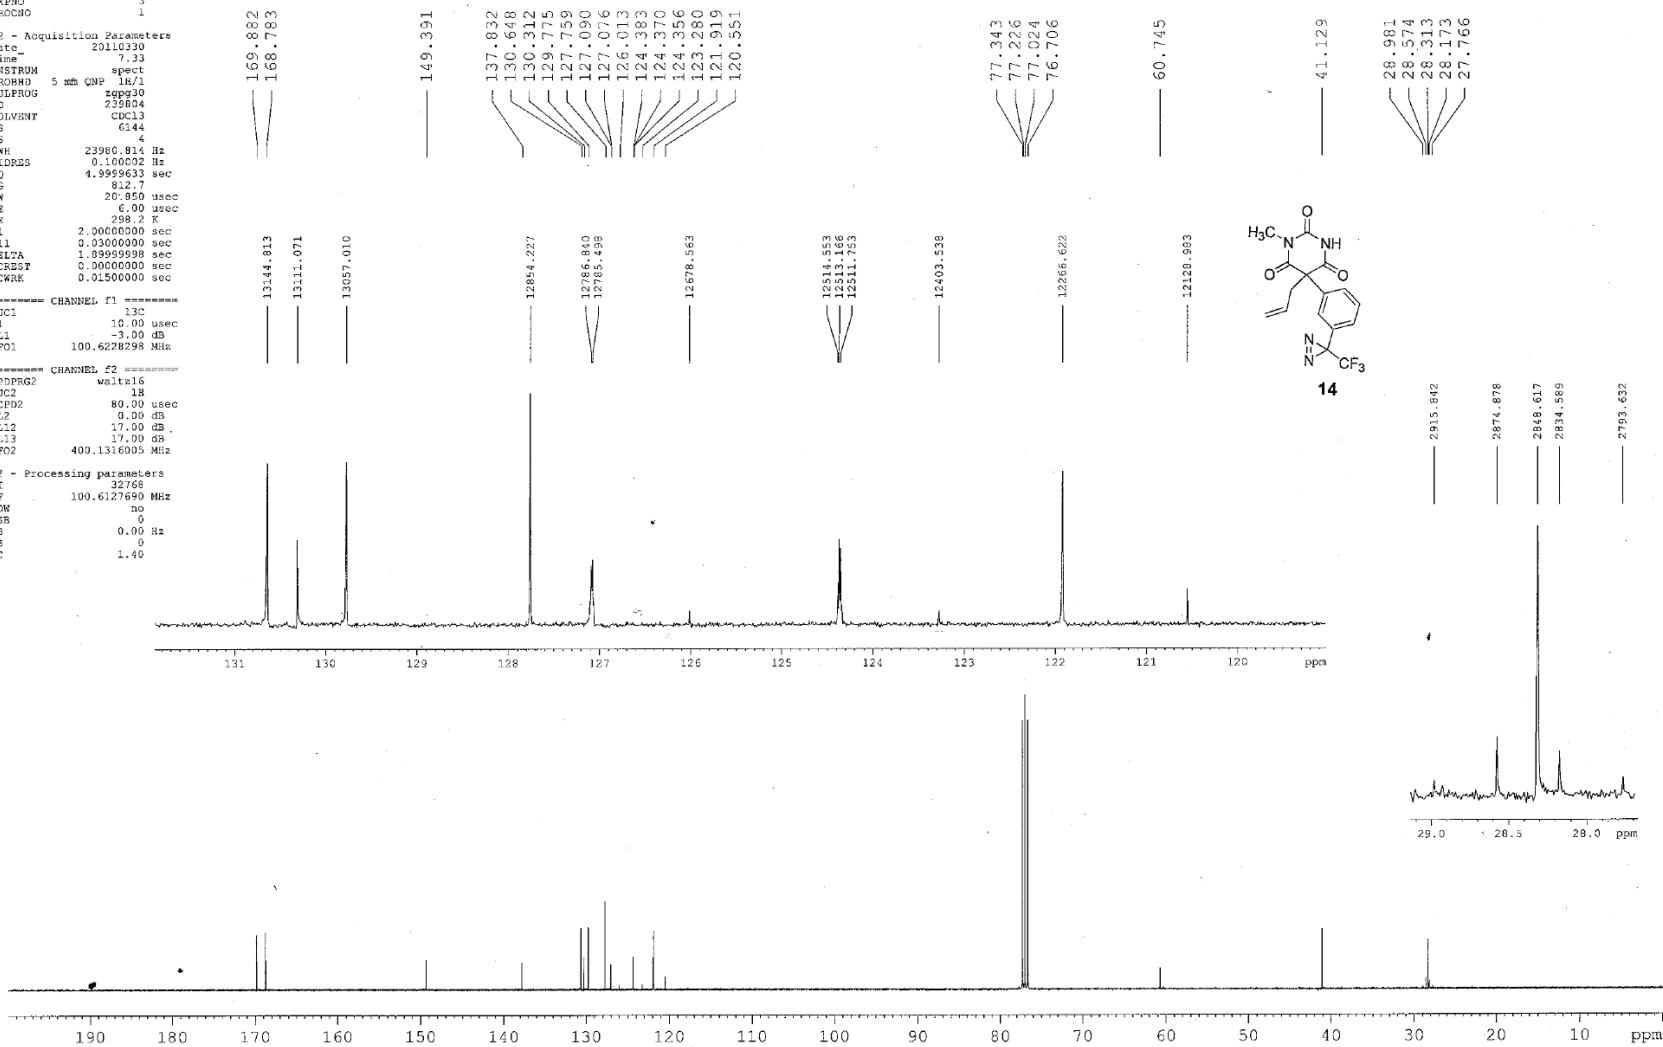

Current Data Parameters  
 NAME 20110329N250HarDiaz repur  
 EXFNO 2  
 PROCNO 1

F2 - Acquisition Parameters  
 Date 20110329  
 Time 19.26  
 INSTRUM spect  
 PROBHD 5 mm QNP 1H/1  
 PULPROG zgpg30  
 TD 451120  
 SOLVENT C6D6  
 NS 16  
 DS 4  
 SWH 75187.969 Hz  
 FIDRES 0.166670 Hz  
 AQ 2.9999981 sec  
 RG 912.3  
 DW 6.650 usec  
 DE 6.00 usec  
 TE 298.2 K  
 D1 1.00000000 sec

----- CHANNEL f1 -----  
 NUC1 19F  
 P1 12.50 usec  
 PL1 -6.00 dB  
 SF01 376.4607044 MHz

F2 - Processing parameters  
 SI 65336  
 SF 376.4983540 MHz  
 WDW EM  
 SSB 0  
 LB 0.30 Hz  
 GB 0  
 PC 1.00

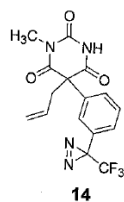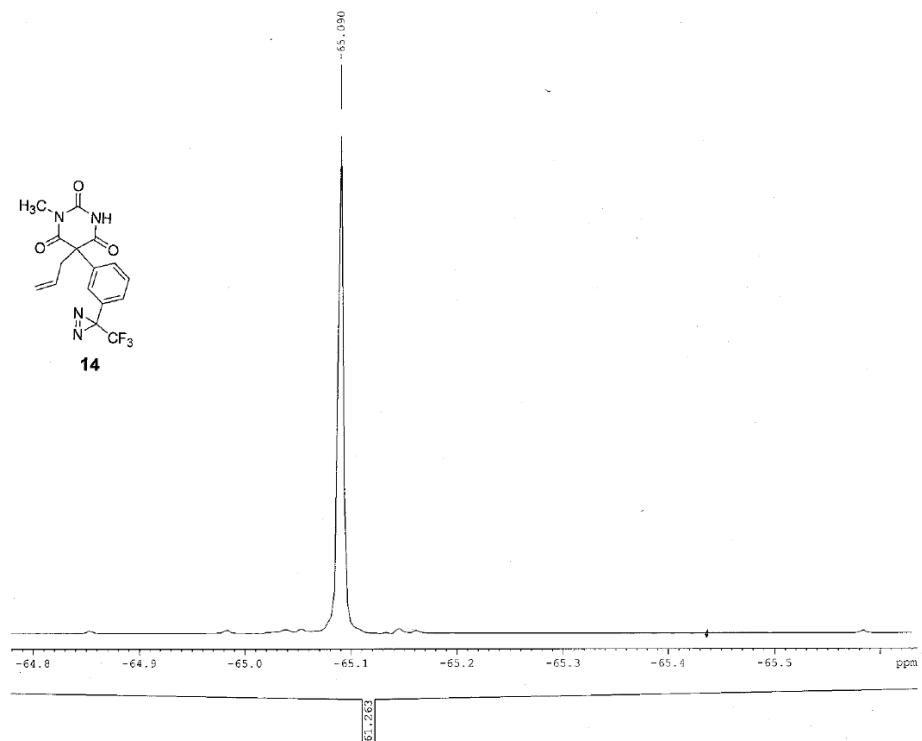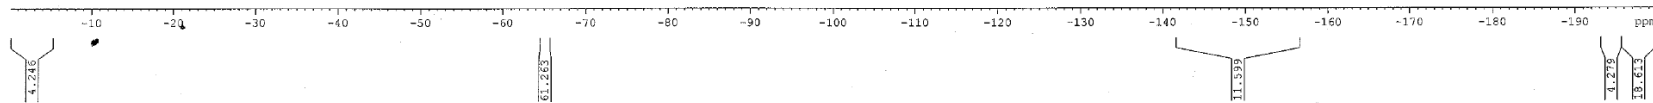

Current Data Parameters  
 NAME 20110503N271e209 FpgBarb-mDias  
 EXPNO 1  
 PROCNO 1

F2 - Acquisition Parameters  
 Date\_ 20110503  
 Time 12.40  
 INSTRUM spect  
 PROBRD 5 mm PABBO WB-  
 PULPROG zgpg30  
 TO 65536  
 SOLVENT ccdcl3  
 NS 16  
 DS 2  
 SWH 8278.146 Hz  
 FIDRES 0.176314 Hz  
 AQ 3.9594243 sec  
 RG 25.4  
 DW 60.460 usec  
 DE 6.00 usec  
 TE 297.5 K  
 D1 1.0000000 sec  
 MCREST 0.0000000 sec  
 MCWRR 0.01500000 sec

CHANNEL f1  
 NUC1 13C  
 P1 12.25 usec  
 PL1 -2.00 dB  
 SFO1 400.172417 MHz  
 F2 - Processing parameters  
 SI 32768  
 SF 400.1700000 MHz  
 WHW 8M  
 SSB 0  
 LB 0.30 Hz  
 GB 0  
 PC 1.00

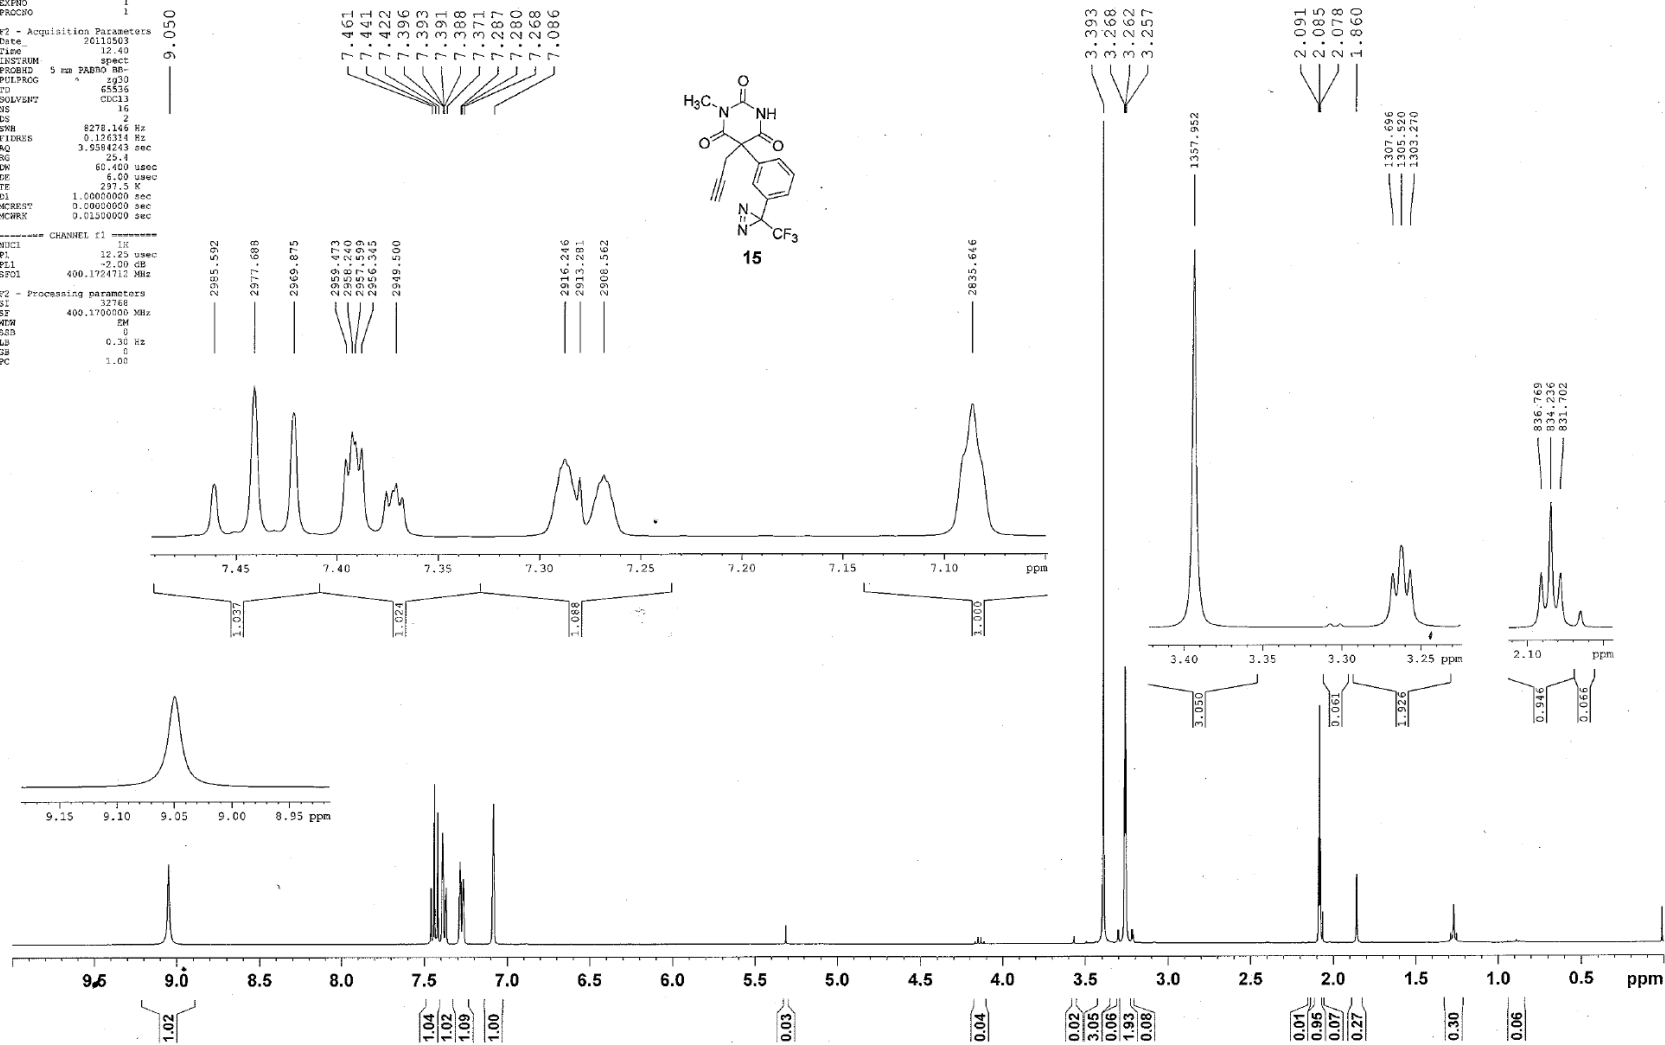

Current Data Parameters  
 NAME 201205180271a209 MeBarbDpp-mDias  
 EXPR0 2  
 PROC00 3

F2 - Acquisition Parameters  
 Date 20110518  
 Time 16.04  
 INSTRUM spect  
 PROC00 5 mm QNP 1H/1  
 PULPROG zgpg30  
 TD 65536  
 SOLVENT CDCl3  
 NS 1024  
 DS 4  
 SWE 22980.814 Hz  
 FIDRES 0.395938 Hz  
 AQ 1.3664756 sec  
 WC 724.1  
 EM 20.850 usec  
 DE 8.00 usec  
 TE 303.2 K  
 D1 2.00000000 sec  
 d11 0.33000000 sec  
 DELTA 1.89999998 sec  
 MCH001 0.00000000 sec  
 MCH002 0.31000000 sec

CHANNEL f1  
 NUC1 13C  
 P1 10.00 usec  
 PL1 3.00 dB  
 SFO1 100.628298 MHz

CHANNEL f2  
 CDP002 waltz16  
 NUC2 1H  
 PCPD2 80.00 usec  
 PL2 0.00 dB  
 PL12 17.00 dB  
 PL13 17.00 dB  
 SFO2 400.1316005 MHz

F2 - Processing parameters  
 SI 32768  
 SP 100.6127689 MHz  
 RMW 0  
 SSB 0  
 LB 1.00 Hz  
 GB 0  
 PC 1.40

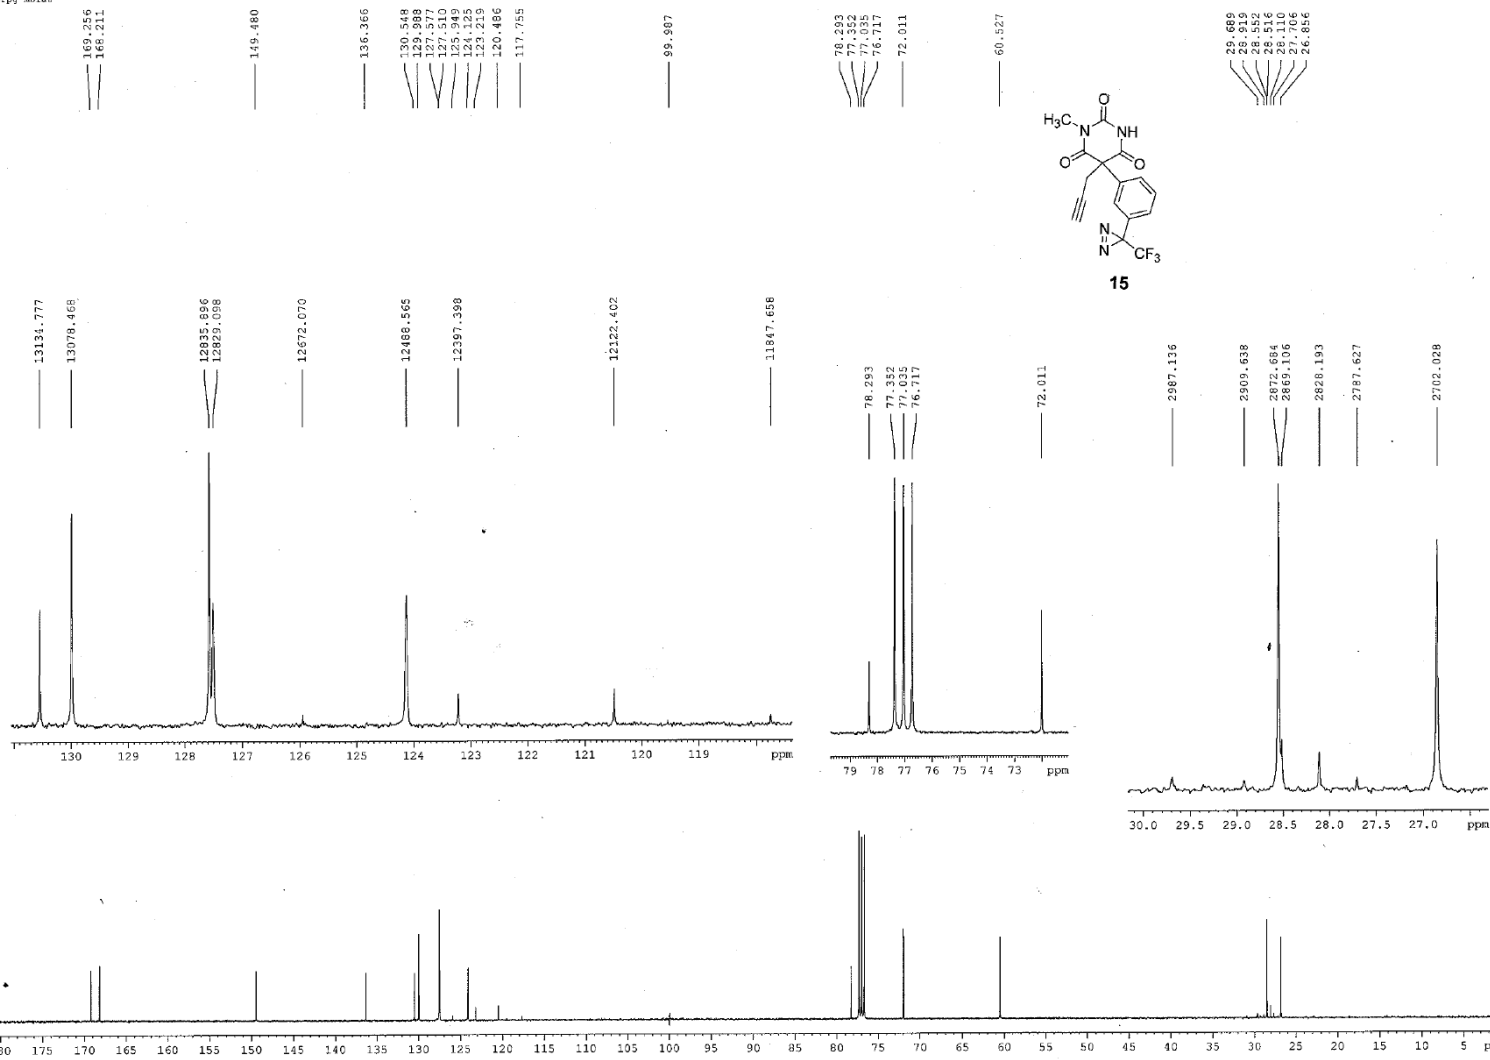

Current Data Parameters  
 NAME 20110518N271e209 MeBarbPp-sDiaz  
 EXPNO 2  
 PROCNO 1

F2 - Acquisition Parameters  
 Date 20110519  
 Time 12.03  
 INSTRUM spect  
 PROBRD 5 mm QNP 1H/1  
 PULPROG zgpg30  
 TD 390784  
 SOLVENT C6D6  
 NS 16  
 DS 4  
 SWH 75107.969 Hz  
 FREQSS 0.250007 Hz  
 AQ 1.9999976 sec  
 RG 645.1  
 DW 6.650 usec  
 DE 6.00 usec  
 TE 299.2 K  
 D1 1.0000000 sec

----- CHANNEL f1 -----  
 NUC1 19F  
 P1 12.00 usec  
 PL1 -6.00 dB  
 SFO1 376.4607044 MHz

F2 - Processing parameters  
 SI 65536  
 SF 376.4983540 MHz  
 WCW 6K  
 SSB 0  
 LB 0.30 Hz  
 GB 0  
 PC 1.00

62.926  
 62.922  
 62.918

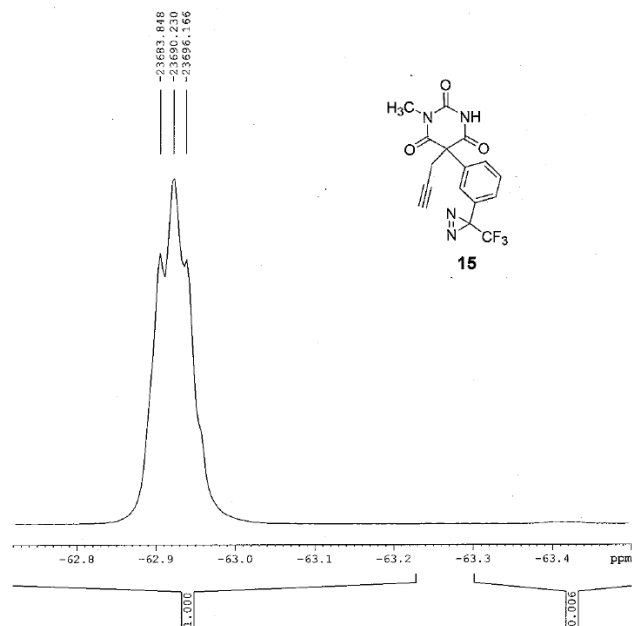

-10 -20 -30 -40 -50 -60 -70 -80 -90 -100 -110 -120 -130 -140 -150 -160 -170 -180 -190 ppm

62.926  
 62.922  
 62.918

Current Data Parameters  
 NAME 2011118349246 sHBarbPro  
 EXPNO 1  
 PROCNO 1  
 F2 - Acquisition Parameters  
 Date\_ 20111118  
 Time 14.59  
 INSTRUM spect  
 PROBHD 5 mm QNP 1H/1  
 PULPROG zgpg30  
 TD 65536  
 CQX13  
 SOLVENT  
 NS 16  
 DS 2  
 SWH 8278.146 Hz  
 FIDRES 0.126314 Hz  
 AQ 3.9584243 sec  
 RG 161  
 DW 60.400 usec  
 DB 6.00 usec  
 TS 299.2 K  
 D1 1.00000000 sec  
 NUC1 1H  
 NUC2 13C  
 NUC3 19F  
 NUC4  
 NUC5  
 NUC6  
 NUC7  
 NUC8  
 NUC9  
 NUC10  
 NUC11  
 NUC12  
 NUC13  
 NUC14  
 NUC15  
 NUC16  
 CHANDEL f1  
 MUC1 1H  
 P1 12.00 usec  
 PL1 0.00 dB  
 SFO1 400.1324510 MHz  
 F2 - Processing parameters  
 SI 32768  
 SF 400.1300000 MHz  
 REW 64  
 SSI 0  
 LB 0.30 Hz  
 GB 0  
 PC 1.00

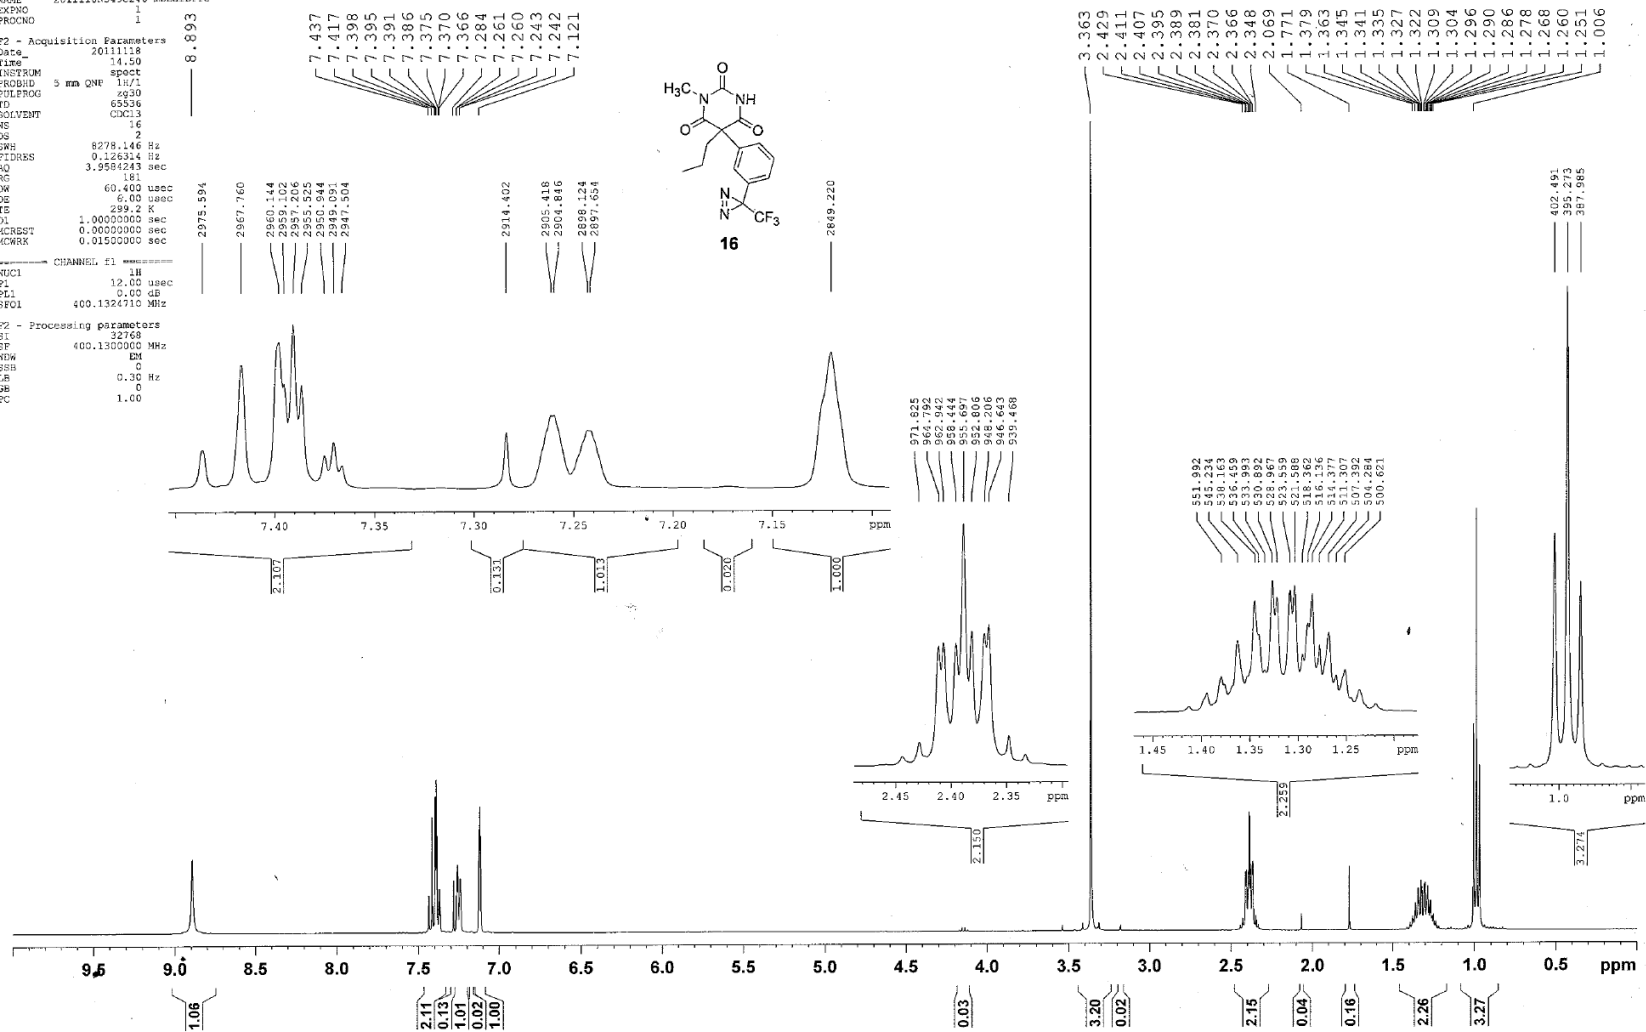

Current Data Parameters  
 NAME 201118N349246 mDBarbPro  
 EXNO 4  
 PROCNO 1

F2 - Acquisition Parameters  
 Date 20111118  
 Time 15.14  
 INSTRUM spect  
 PROBHD 5 mm QNP 1H/1  
 PULPROG zgpg30  
 TD 65536  
 SOLVENT CDCl3  
 NS 1024  
 DS 4  
 SWH 23980.814 Hz  
 FIDRES 0.365918 Hz  
 AQ 1.3664756 sec  
 RG 724.1  
 DW 20.850 usec  
 DE 6.00 usec  
 TE 299.2 K  
 D1 2.00000000 sec  
 d11 0.03000000 sec  
 DELTA 1.39999999 sec  
 MCREST 0.00000000 sec  
 MCWRR 0.01500000 sec

CHANNEL F1  
 NDC1 13C  
 P1 10.00 usec  
 PL1 -9.00 dB  
 SFO1 100.6228298 MHz

CHANNEL F2  
 CPDPRG2 waltz16  
 NUC2 1H  
 PCPD2 80.00 usec  
 PL2 0.00 dB  
 PL12 17.00 dB  
 PL13 17.00 dB  
 SFO2 400.1315005 MHz

F2 - Processing parameters  
 SI 32768  
 SF 100.6127690 MHz  
 WDW EM  
 SSB 0  
 LB 1.00 Hz  
 GB 0  
 PC 1.40

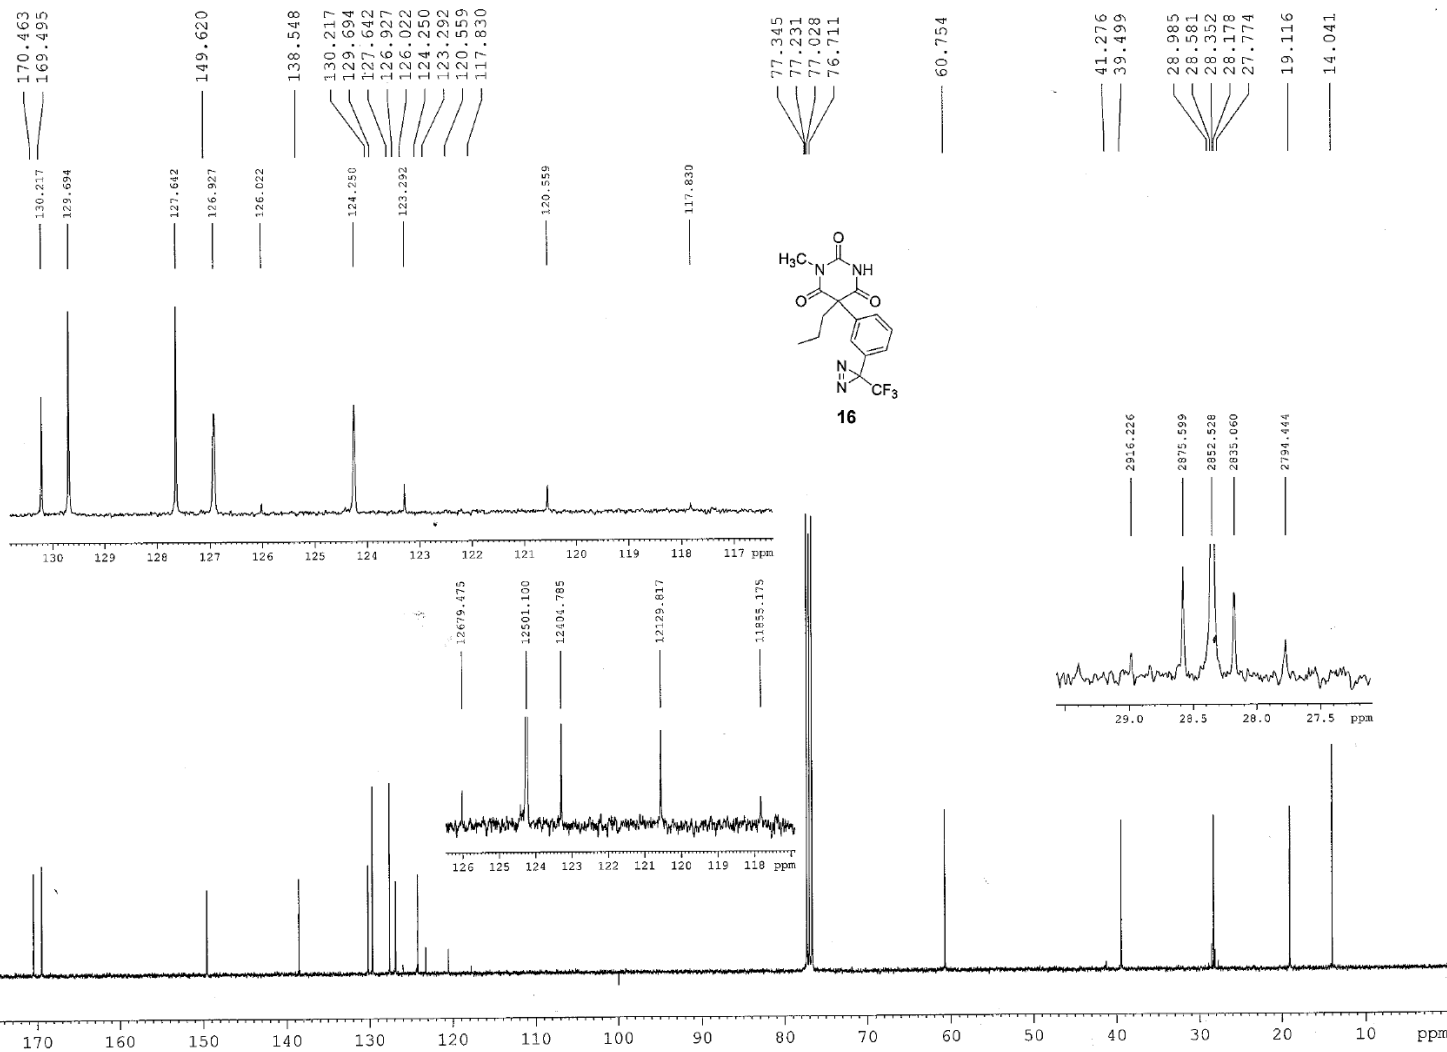



Current Data Parameters  
 NAME 201118R349e246 mDBarbPro  
 EXPRNO 2  
 PRGNO 1

F2 - Acquisition Parameters  
 Date\_ 20111118  
 Time 14.57  
 INSTRUM spect  
 PROBHD 5 mm QNP 1H/1  
 PULPROG zgpg30  
 TD 451120  
 SOLVENT CDCl3  
 NS 16  
 DS 4  
 SWH 75187.969 Hz  
 FIDRES 0.166670 Hz  
 AQ 2.990981 sec  
 RG 645.1  
 DW 6.650 usec  
 DE 6.00 usec  
 TE 299.2 K  
 D1 1.0000000 sec

----- CHANNEL f1 -----  
 NDC1 19F  
 P1 12.50 usec  
 PL1 -6.00 dB  
 SFO1 376.4607044 MHz

F2 - Processing parameters  
 SI 65536  
 SF 376.4983400 MHz  
 WDW EM  
 SSB 0  
 LB 0.30 Hz  
 GB 0  
 PC 1.00

-65.065  
 -65.119  
 -65.170

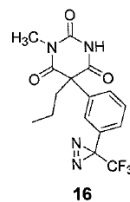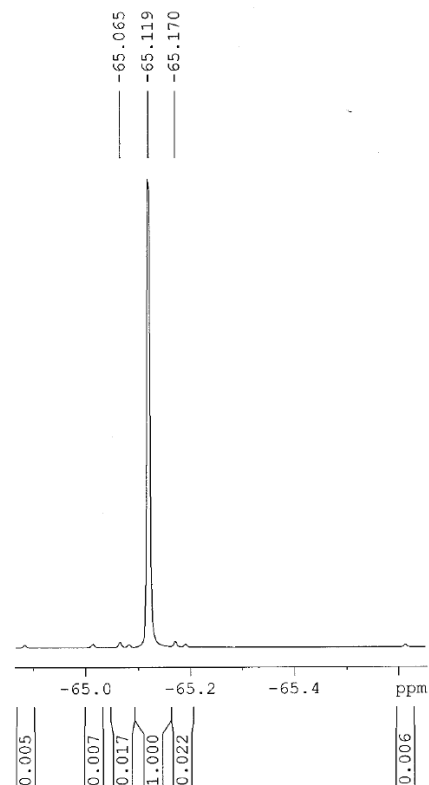

-10 -20 -30 -40 -50 -60 -70 -80 -90 -100 -110 -120 -130 -140 -150 -160 -170 -180 -190 ppm

0.005  
 0.007  
 0.017  
 1.000  
 0.022  
 0.006

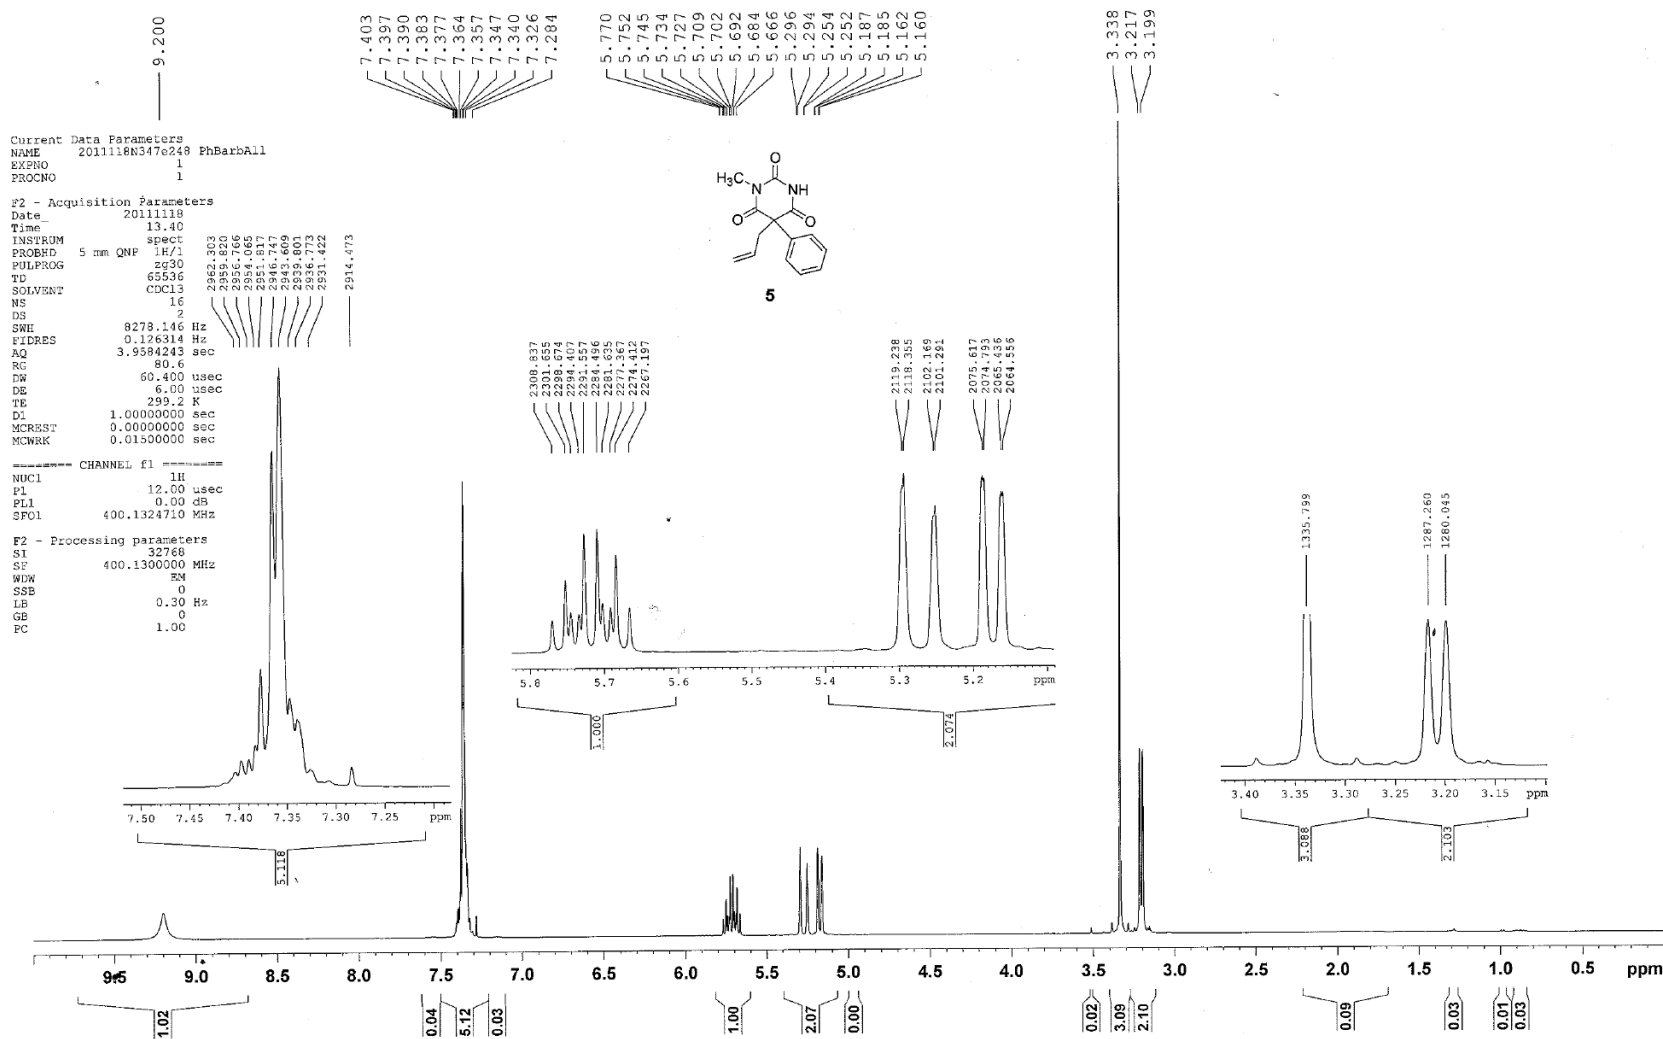

Supplement: NIHMS495355-supplement-Supplementary_Information.pdf [file NIHMS495355-supplement-Supplementary_Information.pdf]
